# Supplementary material for: Mapping patient pathways and estimating resource use for point of care versus standard testing and treatment of chlamydia and gonorrhoea in genitourinary medicine clinics in the UK
Source: PubMed Central journal article supplement — BMJ Open. 2014 Jul 22;4(7):e005322. doi: 10.1136/bmjopen-2014-005322 (PMC4120370; doi:10.1136/bmjopen-2014-005322), 2014-07-22
Supplement: bmjopen-2014-005322.draft_revisions.pdf [file bmjopen-2014-005322.draft_revisions.pdf]

# BMJ Open

## Mapping patient pathways and estimating resource use for point of care versus standard testing and treatment of chlamydia and gonorrhoea in genitourinary medicine clinics in the UK

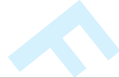

|                                 |                                                                                                                                                                                                                                                                                                                                                                                                                                                                                                                                                                                                                                      |
|---------------------------------|--------------------------------------------------------------------------------------------------------------------------------------------------------------------------------------------------------------------------------------------------------------------------------------------------------------------------------------------------------------------------------------------------------------------------------------------------------------------------------------------------------------------------------------------------------------------------------------------------------------------------------------|
| Journal:                        | <i>BMJ Open</i>                                                                                                                                                                                                                                                                                                                                                                                                                                                                                                                                                                                                                      |
| Manuscript ID:                  | bmjopen-2014-005322                                                                                                                                                                                                                                                                                                                                                                                                                                                                                                                                                                                                                  |
| Article Type:                   | Research                                                                                                                                                                                                                                                                                                                                                                                                                                                                                                                                                                                                                             |
| Date Submitted by the Author:   | 22-Mar-2014                                                                                                                                                                                                                                                                                                                                                                                                                                                                                                                                                                                                                          |
| Complete List of Authors:       | Adams, Elisabeth; Aquarius Population Health, ; University of Bristol, School of Social and Community Medicine<br>Ehrlich, Alice; Aquarius Population Health,<br>Turner, Katy; Bristol University<br>Shah, Kunj; Aquarius Population Health,<br>Macleod, John; University of Bristol<br>Goldenberg, Simon; Guy's & St. Thomas' NHS Foundation Trust and King's College,<br>Meray Patel, Robin; Aquarius Population Health,<br>Pearce, Vikki; V. Pearce Consulting,<br>Horner, Paddy; University of Bristol, School of Social and Community Medicine; University Hospitals Bristol NHS Foundation Trust, Bristol Sexual Health Centre |
| <b>Primary Subject Heading</b>: | Sexual health                                                                                                                                                                                                                                                                                                                                                                                                                                                                                                                                                                                                                        |
| Secondary Subject Heading:      | Diagnostics, Health economics, Health services research, Infectious diseases                                                                                                                                                                                                                                                                                                                                                                                                                                                                                                                                                         |
| Keywords:                       | GENITOURINARY MEDICINE, HEALTH ECONOMICS, HEALTH SERVICES ADMINISTRATION & MANAGEMENT, Organisation of health services < HEALTH SERVICES ADMINISTRATION & MANAGEMENT, SEXUAL MEDICINE, Health economics < HEALTH SERVICES ADMINISTRATION & MANAGEMENT                                                                                                                                                                                                                                                                                                                                                                                |
|                                 |                                                                                                                                                                                                                                                                                                                                                                                                                                                                                                                                                                                                                                      |

SCHOLARONE™  
Manuscripts

**TITLE**

Research: Patient care pathways using chlamydia and gonorrhoea tests are evolving: point of care nucleic acid amplification tests may reduce genitourinary medicine service delivery costs.

**CORRESPONDING AUTHOR**

Elisabeth Adams, Aquarius Population Health Limited, Engine Shed, Station Approach, Temple Meads, Bristol BS1 6QH; tel +44 (0) 7976309695; elisabeth.adams@aquariusph.com

**AUTHORS**

Elisabeth J Adams<sup>1,2</sup>, Alice Ehrlich<sup>1</sup>, Katherine ME Turner<sup>2</sup>, Kunj Shah<sup>1</sup>, John Macleod<sup>2</sup>,

Simon Goldenberg<sup>3</sup>, Robin K Meray<sup>1</sup>, Vikki Pearce<sup>4</sup>, Patrick Horner<sup>2,5</sup>

**AFFILIATIONS**

1 – Aquarius Population Health Limited, Bristol, UK

2 – School of Social and Community Medicine, University of Bristol, Bristol, UK

3 – Centre for Clinical Infection & Diagnostics Research, Guy's & St. Thomas' NHS Foundation Trust and King's College, London, UK

4 – V. Pearce Consulting Ltd, Hove, UK

5 – Department of Genitourinary Medicine, NHS Bristol, Bristol UK

**KEYWORDS**

Point of care technology, diagnostic test, gonorrhoea, chlamydia, costs and cost analysis

**WORD COUNT**

2827

## ABSTRACT

### Objectives

We aimed to explore patient pathways using a chlamydia/gonorrhoea point of care (POC) nucleic acid amplification test (NAAT), and estimate and compare the costs of the proposed POC pathways with the current pathways using standard laboratory-based NAAT testing.

### Design/Participants

Workshops were conducted with health care professionals at four sexual health clinics representing diverse models of care in the UK. They mapped out current pathways that used chlamydia/gonorrhoea tests, and constructed new pathways using a POC NAAT. Healthcare professionals' time was assessed in each pathway.

### Outcome measure

The proposed POC pathways were then priced using a model built in Microsoft Excel, and compared to previously published costs for pathways using standard NAAT-based testing in an off-site laboratory.

### Results

Pathways using a POC NAAT for asymptomatic and symptomatic patients and chlamydia/gonorrhoea-only tests were shorter and less expensive than most of the current pathways. Notably, we estimate that POC testing as part of a sexual health screen for symptomatic patients, or as stand-alone chlamydia/gonorrhoea testing, could reduce costs per patient by as much as £16 or £6, respectively. In both cases, health care professionals' time would be reduced by approximately 10 minutes per patient.

### Conclusions

POC testing for chlamydia/gonorrhoea in a clinical setting may reduce costs and clinician time, and may lead to more appropriate and quicker care for patients. Further study is warranted on how to best implement POC testing in clinics, and on the broader clinical and cost implications of this technology.

## STRENGTHS AND LIMITATIONS OF THIS STUDY

- The main strength of this study is that it presents the first estimates of the costs of implementing chlamydia and gonorrhoea point of care testing compared to standard care (off-site laboratory processing of samples) in genitourinary medicine clinics, presenting a consensus from four clinics across England representing a range of service delivery models.
- The main limitation is that this is based on expert clinical opinion, rather than prospectively collected data, as point of care testing for chlamydia and gonorrhoea had not yet been implemented in England when this study was conducted.

## INTRODUCTION

*Chlamydia trachomatis* and *Neisseria gonorrhoea* are common sexually transmitted infections, and if untreated may cause pelvic inflammatory disease, which can result in serious reproductive sequelae such as tubal factor infertility and ectopic pregnancy.[1-3]

Typically the nucleic acid amplification test result for chlamydia and gonorrhoea is available within a week from an off-site laboratory, but it can sometimes be over two weeks until the patient receives treatment, and some patients may not return for treatment.[4,5] If the results of these tests could be available at a single visit, outcomes could be improved by achieving earlier treatment and partner notification, minimising the risk of onward transmission and developing complications.[6-8] Such a service would also likely be more convenient for patients.[7-9]

This could be achieved with sensitive and specific NAAT point of care tests (POCTs), which have recently become available. One such test, Cepheid Xpert® CT/NG (Cepheid, Sunnyvale, CA, USA), has at least equivalent performance to traditional laboratory based NAATs, providing results within 90 minutes of specimen collection.[10]

We have developed a model that enables us to evaluate the components of care pathways and associated costs. In this report we review current patient pathways in sexual health clinics that include chlamydia and gonorrhoea testing and treatment, explore and map new pathways to incorporate chlamydia and gonorrhoea POC testing

1  
2  
3 efficiently in GUM (genitourinary medicine) clinics in the UK, estimate the costs of the new pathways and  
4 compare the costs with the current pathways using standard laboratory-based NAATs.  
5  
6

## 7 **METHODS**

8  
9  
10 Patient pathways using chlamydia/gonorrhoea POCTs were developed during workshops at four sexual health  
11 clinics, attended by three to fifteen staff members across all clinic staff grades. To increase applicability of the  
12 pathways across different service types, we chose a range of clinics with diverse services and service delivery.  
13  
14 Urban and rural clinics (two in the South West of England and two in London), those providing either GUM or  
15 integrated sexual health services, and those serving higher-risk populations were represented. Based on staff  
16 input, patient pathways were constructed to model the consecutive clinical steps involved in testing and  
17 treatment, both for POC pathways and also current service delivery (standard care).  
18  
19  
20  
21  
22

23  
24 A model was built in Microsoft Excel to replicate pathway steps and estimate costs. We assumed the perspective  
25 of the National Health Service (NHS) and only clinical costs were included (£UK2012); patient time and  
26 associated costs were excluded. The staff cost per minute included indirect and overhead costs. Standard off-site  
27 laboratory-based chlamydia/gonorrhoea testing costs and all other cost inputs were taken from previously  
28 published sources using an identical modelling approach,[11] to allow for direct comparison between current  
29 standard pathways and proposed POC pathways (Table A in the Supplementary material online). POCT costs  
30 were based on use of the only currently commercially available chlamydia/gonorrhoea POCT, the Cepheid  
31 Xpert CT/NG system, with a baseline assumed cost of £18, which includes the cartridge, machine rental,  
32 service, and maintenance, assuming 15,000 tests are done annually (i.e., 60 tests/day, Monday-Friday), plus an  
33 additional £1.71 for the Cepheid sample collection materials (data from Cepheid). We varied the POCT cost  
34 from £13/test (assuming 20,000 tests or more annually) to £25 (assuming one test/day). These costs exclude  
35 staff training (likely to be 30 minutes per person). This compares to an assumed baseline cost of £12 for the  
36 standard test plus £1.35 for the sample collection materials.  
37  
38  
39  
40  
41  
42  
43  
44  
45  
46  
47

48  
49 The outputs of the model were the costs of each testing pathway as a primary pathway (delivered on its own)  
50 and as an additional pathway (delivered in conjunction with other clinical services). To estimate the cost of  
51 additional pathways, staff time was weighted by the proportion of additional time, but all non-staff inputs are  
52 included at full value.  
53  
54  
55

56  
57 The total pathway cost = (Cost Step 1) + (Cost Step 2) + ... + (Cost Step N).  
58  
59  
60

1  
2  
3 Detailed descriptions of patient pathway development and cost modelling are available as Supplementary  
4 methods online.  
5  
6

## 7 **RESULTS**

8  
9  
10 Patient testing pathways consist of a set of standard steps: patient registration, consultation, clinical  
11 examination, sample collection (blood, urine, and/or vaginal swab), health promotion counselling, off-site  
12 laboratory-based sample processing, on-site POC testing, microscopic analysis of specimens in the clinic, results  
13 counselling, results management (data entry and notifying patients of results), and contacting patients who test  
14 positive to ensure follow-up treatment. Detailed descriptions of each step are available in Table B in the  
15 Supplementary material online. The standard and POC pathways differ in which steps are used, time for each,  
16 and order of steps. Chlamydia and gonorrhoea testing may be carried out as either stand-alone testing or as part  
17 of a full sexual health screen including additional testing for syphilis and HIV. The sexual health screen for  
18 asymptomatic versus symptomatic patients differs in that the latter includes a clinical examination, culture for  
19 gonorrhoea, and microscopy. The steps of these pathways are shown, along with costs and clinician time, in  
20 Figure 1A. There are two proposed sexual health screen pathways using POC testing, given as POC1 and POC2.  
21  
22  
23  
24  
25  
26  
27  
28  
29

30  
31 [Insert Figure 1]  
32  
33

34 The lengthiest and most costly pathway for chlamydia/gonorrhoea testing is the sexual health screen for  
35 symptomatic patients. A proposed POC pathway could reduce this cost from £99 to £92 per patient (averaging  
36 POC1 and POC2), and reduce health care professional time from 47 to 44 minutes per patient as a primary  
37 pathway. There was a difference in the two proposed POC pathways for symptomatic patients; namely, POC1  
38 includes a slightly longer consultation for patients (15 minutes versus 10 minutes) and an additional step for  
39 health promotion with a Health Adviser for 6 minutes. A portion of the cost savings arises from eliminating the  
40 need for gonorrhoea culture in symptomatic patients, except for those testing positive by POCT. Reductions in  
41 cost and time with POC testing are also expected for stand-alone chlamydia/gonorrhoea testing and for  
42 asymptomatic sexual health screen pathways, when delivered as primary pathways.  
43  
44  
45  
46  
47  
48  
49

50  
51 In some clinics, asymptomatic patients may be offered a rapid sexual health screen, which utilises laboratory-  
52 based chlamydia/gonorrhoea testing but reduces costs and clinician time by combining certain steps. The rapid  
53 sexual health screen is the most cost- and time-efficient sexual health screen pathway (Table C in the  
54 Supplementary material online) but may not be appropriate for all patients. In addition, stand-alone  
55  
56  
57  
58  
59  
60

1  
2  
3 chlamydia/gonorrhoea self-service testing is offered in some clinics, but only to asymptomatic patients;  
4  
5 however, incorporating a POCT into this pathway would increase costs compared to standard care (Table C in  
6  
7 the Supplementary material online).

8  
9 Figure 1B outlines the clinical steps and costs of treating patients for chlamydia or gonorrhoea. Pathway steps  
10  
11 specific to treatment include: gonorrhoea culture for confirmation and antimicrobial sensitivity testing, treatment  
12  
13 with antibiotics, counselling and, if requested, support/assistance with partner notification. A benefit of POC  
14  
15 testing is that patients can initiate treatment during the same visit at which they receive positive diagnosis,  
16  
17 eliminating the need for a follow-up treatment visit, resulting in lower overall cost. For example, under current  
18  
19 practice, it would cost £114.66 to screen and treat a chlamydia positive patient having an asymptomatic screen  
20  
21 (primary screen, £79.77; primary treatment at second attendance, £34.89). This could be reduced to £100.49  
22  
23 with a POCT, as the patient would be treated as part of the same attendance (primary screen, £75.50 [average of  
24  
25 POC1 and POC2]; additional treatment, £24.99).

26  
27 Furthermore, under current practice, some symptomatic patients and partners of positive patients are treated  
28  
29 empirically at their testing visit before laboratory-confirmed results are available. Symptomatic patients treated  
30  
31 presumptively for chlamydia or gonorrhoea infection incur costs of £124.37 and £201.24 per patient,  
32  
33 respectively (primary symptomatic sexual health screen, £99.38; plus additional chlamydia treatment, £24.99; or  
34  
35 gonorrhoea treatment including a four-week follow up test of cure, £101.86). If a POCT were used on these  
36  
37 symptomatic patients, the cost of the testing and treatment pathways (averaging POC1 and POC2) would be less  
38  
39 than standard care (chlamydia, £117.42; gonorrhoea, £200.18), and the number of patients treated  
40  
41 inappropriately would be reduced. This could enable more appropriate treatment if a non-specific genital tract  
42  
43 infection is suspected, or potentially no treatment at all which would reduce costs by £24.99 for chlamydia and  
44  
45 £101.86 for gonorrhoea.

## 46 **DISCUSSION**

47  
48 Our results indicate that the total cost of most chlamydia/gonorrhoea testing pathways in GUM clinics would be  
49  
50 similar or reduced by using POC testing in place of off-site laboratory-based testing, and staff time would be  
51  
52 reduced. In addition to these benefits, POC technologies have the potential to significantly improve sexual  
53  
54 health care, enabling for the first time accurate chlamydia and gonorrhoea specific diagnoses to be made and  
55  
56 appropriately treated in a single visit. This may reduce the number of onward transmissions, inappropriate  
57  
58 treatments in patients who are chlamydia or gonorrhoea negative but treated presumptively, and prevent pelvic  
59  
60

1  
2  
3 inflammatory disease in women.[6] By reducing loss to follow-up, chlamydia/gonorrhoea POC testing could be  
4 particularly useful with groups who are less likely to return for treatment,[2,5,7] including high-risk groups,  
5 such as men who have sex with men, and commercial sex workers. Patients who do not return, or are lost to  
6 follow-up, may comprise up to 10% of all chlamydia diagnoses,[5] although this may be less in GUM clinics.  
7  
8 Chlamydia/gonorrhoea POC pathways could also be implemented in non-GUM settings, such as termination of  
9 pregnancy or contraception clinics. Women infected with chlamydia or gonorrhoea are at increased risk of  
10 developing pelvic inflammatory disease following insertion of an intra-uterine device or termination of  
11 pregnancy,[12,13] and would benefit from a rapid diagnosis.[6] With POCTs, novel ways of testing are  
12 imaginable, e.g. POCTs could be used in outreach, with the platform situated in a mobile sexual health testing  
13 unit that travels to particular groups such as commercial sex workers.  
14  
15  
16  
17  
18  
19  
20  
21

22 However, as with any new technology, potential benefits must be weighed with concerns, such as how to best  
23 manage the 90 minute delay before results are available, although this may be more of an issue for clinicians  
24 than patients.[8,9] Due to variation in the way that GUM services are configured and delivered across England,  
25 the best way to implement a POC pathway may depend on the specific clinic, based on factors including size of  
26 the clinic, location (e.g. rural vs. urban), patient mix, staff mix, etc. For example, in urban clinics, patients could  
27 attend in the morning to register, provide a self-collected sample, and book a slot for later in the day to see a  
28 clinician for a consultation, blood tests, results and treatment if needed. This system of having patients drop off  
29 a sample at the beginning of the day and book in to be seen later may be attractive to patients in an urban  
30 setting, where they could either go back to work/school before their appointment, or spend time in the city  
31 centre. Clinics that currently offer a slot system such as this would easily transition to this type of system using  
32 a point of care test, and patients' treatment could be started on the same day of testing. This system may not  
33 work in practice, however, as patients might give a sample but would not return later. In many rural areas it is  
34 not feasible to make two visits on the same day to the clinic since patients may have a long journey to the GUM  
35 clinic. As many clinics experience long waits to be examined and tested, it is possible that patients would be  
36 willing to wait in clinic until the results are back, so as to be treated at the same visit. Alternatively, patients  
37 could register, have a brief consultation with a clinician, have blood samples taken, and lastly provide a self-  
38 collected urine or vaginal swab sample before leaving the clinic. The clinic would later notify patients of their  
39 results with positive patients returning later in the day or the next day. While it would not offer an instantaneous  
40 result, there could still be significant benefits to patients if they were treated the next day rather than waiting 1-2  
41  
42  
43  
44  
45  
46  
47  
48  
49  
50  
51  
52  
53  
54  
55  
56  
57  
58  
59  
60



1  
2  
3 weeks as under standard care. Additional benefits and concerns of POC pathways are presented in Table D in  
4  
5 the Supplementary material online.  
6

7 We anticipate that POC testing may also reduce costs associated with testing and treating partners of  
8  
9 chlamydia/gonorrhoea positive patients and improve antimicrobial stewardship, an international priority.[14,15]  
10  
11 Standard practice is to offer chlamydia and gonorrhoea treatment presumptively to partners of positive patients  
12  
13 (epidemiological treatment) when they attend for screening [16,17] As the routine NAAT result is not available  
14  
15 at the time of testing it cannot be used to inform the decision of whether treatment is actually indicated and  
16  
17 contacts will be treated unnecessarily. Currently the results of testing, at the time of epidemiological treatment  
18  
19 of partners, are used for surveillance purposes and if positive, additional partner notification when indicated. If  
20  
21 87.9% and 85.7% of partners of chlamydia and gonorrhoea-positive patients are tested for chlamydia/  
22  
23 gonorrhoea at the same time they receive treatment [1] and 36.8% and 33.2% of the partners are positive,  
24  
25 respectively, we estimate that using a POC NAAT on partners before treatment would save £19 and £62 for  
26  
27 partners of chlamydia and gonorrhoea-positive individuals, compared to standard care. For gonorrhoea, we  
28  
29 estimate there would be a cost savings if the positivity is less than 93% in partners and 50% undergo  
30  
31 chlamydia/gonorrhoea testing, as the gonorrhoea management pathway is expensive compared to testing. Hence,  
32  
33 efficiency savings may be gained if the prevalence in partners is low, but it would be more costly to use a POC  
34  
35 NAAT on partners first before treatment if a high proportion of partners are positive. However, both scenarios  
36  
37 would reduce overtreatment and therefore improve antimicrobial stewardship in genitourinary  
38  
39 medicine.[14,15,18]

40 Our study proposes several novel chlamydia/gonorrhoea testing pathways using POC technologies which may  
41  
42 reduce costs and health care professionals' time in GUM clinics. Although our study is based on use of the only  
43  
44 currently commercially available chlamydia/gonorrhoea POCT, the Cepheid Xpert CT/NG system, we  
45  
46 anticipate that results would be applicable to other tests with similar performance characteristics. If other tests  
47  
48 become available, their pathway costs could be estimated and compared using the same model. This is a  
49  
50 modelling study based on theoretical pathways and we did not aim to test that the pathways would work in  
51  
52 practice or validate the steps. Once these tests are in clinics, rigorous evaluation is required in order to ensure  
53  
54 that they are delivering the promised benefits at no additional overall cost.  
55  
56  
57  
58  
59  
60

**FIGURE 1 TITLE**

**Comparison of current and proposed POC clinical pathways for chlamydia and gonorrhoea testing and treatment.**

**FIGURE 1 LEGEND**

The clinical pathway steps for chlamydia and gonorrhoea (A) testing and (B) treatment are shown along with cost per patient and minutes of health care professionals' time for each pathway when delivered as either a primary or an additional pathway. The first step, patient registration, is common to all pathways and is not shown. Alternative POC pathways proposed by different clinics are reported as POC1 and POC2. The cost of POC pathways may vary by -£5/+£7 based on volume of tests performed. NG, *Neisseria gonorrhoeae*. TOC, test of cure performed four weeks after initial treatment for gonorrhoea. \*Urine/vulvo-vaginal swab collected for chlamydia and gonorrhoea testing. †Blood sample collected for HIV and syphilis testing. ‡Patients would drop off sample and book an appointment later in the day for their consultation and results.

**ACKNOWLEDGEMENTS**

Thank you to the clinic leads for organising workshops and all of the staff for their participation: Bristol Sexual Health Clinic, Andrew de Burgh-Thomas and Indrajith Karunaratne – Hope House (Gloucester GUM clinic), Simon Barton and Nneka Nwokolo – 56 Dean Street (Chelsea & Westminster NHS Trust, London), Michael Brady – Camberwell Sexual Health Clinic (Kings College Hospital). Thanks to Pathway Analytics for providing the input data from their model, and finally thanks to Alisha Davies, Jeff Round and Arminster Deol for useful comments on the study and the manuscript.

**CONTRIBUTOR STATEMENT**

PH and EA conceived the study idea, EA conducted the workshops, supervised the project, planned the pathway model, analysed and interpreted the model results and drafted the manuscript. PH provided clinical input on the pathways, interpreted model results, and helped draft the manuscript. KS built the pathway model in Excel. AE helped draft the manuscript and provided study support. PH and JM provided expert opinion on the parameter choices and guidance on the structure of the model. SG provided expert knowledge regarding the use of point of care tests from a microbiological context. RM helped draft the manuscript. VP provided expert advice about the

1  
2  
3 sexual health pathways and commissioning/funding. EA, PH, JM and SG contributed to the study design. All  
4 authors critically reviewed the paper for content and approved the final submitted version.  
5  
6

### 7 **COMPETING INTERESTS**

8  
9  
10 EA has received funding from Atlas Genetics, Astra Zeneca, Bristol University, Cepheid, Gilead, Hologic the  
11 Office for Sexual Health, Pathway Analytics and St Georges University and for sexual health consultancy and  
12 lectures; PH has received funding from HEFC, BASHH, the Bristol University, Imperial College London, the  
13 CPS and Hologic for consultancy, lectures, patents, and providing evidence; KT has received funding from for  
14 NIHR for a personal fellowship, and from NHS Bristol Hospitals Health Trust, the Office for Sexual Health and  
15 NICE for consultancy. SG has received funding from Cepheid for travel and accommodation for work not  
16 related to this submission. EA, SG, RM, VP, Bristol University (PH & JM), AE and KS received funding from  
17 Aquarius Population Health for this work. No other conflicts of interest.  
18  
19

20  
21 Authors are independent for the purposes of publication and Cepheid did not have any role in the writing of this  
22 paper or veto over any results published. Cepheid provided funding to Aquarius Population Health to conduct  
23 the study and estimates of the cost of their proprietary Point of Care Test. Other similar tests are, or are soon to  
24 be commercially available. The results presented could be applicable to any other point of care test with similar  
25 performance, cost and usability. We do not make any recommendation as to which test, if any, a clinic should  
26 use.  
27  
28

### 29 **FUNDING**

30  
31  
32  
33  
34  
35  
36  
37  
38  
39  
40 Cepheid funded Aquarius Population Health to conduct the study.  
41  
42  
43  
44  
45  
46  
47  
48  
49  
50  
51  
52  
53  
54  
55  
56  
57  
58  
59  
60

## REFERENCES

1. Public Health England. STI Data Tables. 2012.  
[http://www.hpa.org.uk/webc/HPAwebFile/HPAweb\\_C/1247816547927](http://www.hpa.org.uk/webc/HPAwebFile/HPAweb_C/1247816547927).
2. Jain A, Ison CA. Chlamydia point-of-care testing: where are we now? *Sex Transm Infect* 2013 Mar;**89**(2):88-9.
3. CDC. Sexually transmitted diseases treatment guidelines 2010. 17/12/2010. Report No.: 59  
<http://www.cdc.gov/std/treatment/2010/STD-Treatment-2010-RR5912.pdf>.
4. Medical Foundation for AIDS & Sexual Health & British Association for Sexual Health and HIV. Standards for the Management of Sexually Transmitted Infections (STI) 2010. 1/1/2010.  
<http://www.bashh.org/documents/MF%20BASSH%20standards%2018Jan%20for%20the%20website.pdf>.
5. National Chlamydia Screening Programme. National Chlamydia Screening Programme Scorecard - NCSP data based on data as of 25.05.12 for the period 1st April 2011 - 31st March 2012. GUM data are for the period of Jan - December 2011. 2012. [http://www.chlamydia-screening.nhs.uk/ps/resources/data-tables/NCSP\\_Scorecard\\_Q1-4\\_2011\\_12.pdf](http://www.chlamydia-screening.nhs.uk/ps/resources/data-tables/NCSP_Scorecard_Q1-4_2011_12.pdf).
6. Turner KM, Round J, Horner P, et al. An early evaluation of clinical and economic costs and benefits of implementing point of care NAAT tests for Chlamydia trachomatis and Neisseria gonorrhoea in genitourinary medicine clinics in England. *Sex Transm Infect* 2013 Nov 22.
7. Watchirs Smith LA, Hillman R, Ward J, et al. Point-of-care tests for the diagnosis of *Neisseria gonorrhoeae* infection: a systematic review of operational and performance characteristics. *Sex Transm Infect* 2012 Oct 23;**89**(4):320-6.
8. Hsieh YH, Hogan MT, Barnes M, et al. Perceptions of an ideal point-of-care test for sexually transmitted infections--a qualitative study of focus group discussions with medical providers. *PLoS One* 2010;**5**(11):e14144.
9. Mahilum-Tapay L, Laitila V, Wawrzyniak JJ, et al. New point of care Chlamydia Rapid Test--bridging the gap between diagnosis and treatment: performance evaluation study. *BMJ* 2007 Dec 8;**335**(7631):1190-4.
10. Gaydos CA, van der Pol B, Jett-Goheen M, et al. Performance of the Cepheid CT/NG Xpert Rapid PCR Test for the Detection of *Chlamydia trachomatis* and *Neisseria gonorrhoeae*. *J Clin Microbiol* 2013 Mar 6.
11. Pathway Analytics. Sexual Health Tariff. <http://www.pathwayanalytics.com/cms/sh-tariff> Last accessed: 21/1/2013
12. Blackwell A, Thomas P, Wareham K, et al. Health gains from screening for infection of the lower genital tract in women attending for termination of pregnancy. *Lancet* 1993;**342**:206-10.

13. Grimes DA. Intrauterine device and upper-genital-tract infection. *Lancet* 2000 Sep 16;**356**(9234):1013-9.
14. Centers for Disease Control and Prevention (CDC). Antibiotic stewardship — the ultimate return on investment. 5/11/2013. <http://www.cdc.gov/getsmart/healthcare/learn-from-others/factsheets/antibiotic-use.html>.
15. Department of Health. Antimicrobial stewardship: "Smart Smart - then focus". 18/11/2011. [https://www.gov.uk/government/uploads/system/uploads/attachment\\_data/file/215308/dh\\_131181.pdf](https://www.gov.uk/government/uploads/system/uploads/attachment_data/file/215308/dh_131181.pdf).
16. Bignell CJ, FitzGerald M. UK national guideline for the management of gonorrhoea in adults, 2011. *Int J STI AIDS* 2011;**22**:551-47.
17. Horner PJ, Boag FC. 2006 UK National Guideline for the Management of Genital Tract Infection with *Chlamydia trachomatis*. British Association of Sexual Health & HIV; 2006.
18. Ison CA. Antimicrobial resistance in sexually transmitted infections in the developed world: implications for rational treatment. *Current Opinion in Infectious Diseases* 2012 Feb;**25**(1):73-8.

| Figure 1: Comparison of current and proposed POC clinical pathways for chlamydia and gonorrhoea testing and treatment |                                                                                                                                                                                                                                          |                    |            |                       |            |
|-----------------------------------------------------------------------------------------------------------------------|------------------------------------------------------------------------------------------------------------------------------------------------------------------------------------------------------------------------------------------|--------------------|------------|-----------------------|------------|
| Pathway                                                                                                               | Clinical Steps                                                                                                                                                                                                                           | As Primary Pathway |            | As Additional Pathway |            |
|                                                                                                                       |                                                                                                                                                                                                                                          | Cost per patient   | Time (min) | Cost per patient      | Time (min) |
| <b>A) Testing Pathways</b>                                                                                            |                                                                                                                                                                                                                                          |                    |            |                       |            |
| <b>Chlamydia and gonorrhoea only</b>                                                                                  |                                                                                                                                                                                                                                          |                    |            |                       |            |
| Current                                                                                                               | Consultation → Sample collection* → Health promotion → Off-site sample processing (1-2 weeks) → Results management → Contact positives                                                                                                   | £45.34             | 32.8       | £28.65                | 15.7       |
| POC                                                                                                                   | Consultation → Sample collection* → POCT (90 minutes) → Results management → Contact positives                                                                                                                                           | £38.76             | 21.8       | £32.59                | 13.4       |
| <b>Sexual health screen for asymptomatic patients</b>                                                                 |                                                                                                                                                                                                                                          |                    |            |                       |            |
| Current                                                                                                               | Consultation → Sample collection* <sup>†</sup> → Health promotion → Off-site sample processing (1-2 weeks) → Results management → Contact positives                                                                                      | £79.77             | 37.2       | £54.86                | 12.3       |
| POC1                                                                                                                  | Consultation → Sample collection* <sup>†</sup> → POCT (90 minutes) → Results management (POCT) → Off-site sample processing (1-2 weeks) → Results management (HIV, syphilis) → Contact positives                                         | £77.42             | 31.2       | £69.43                | 21.1       |
| POC2                                                                                                                  | Sample collection* <sup>‡</sup> → POCT (90 minutes) → Consultation/Results (POCT) → Sample collection <sup>†</sup> → Off-site sample processing (1-2 weeks) → Results management (HIV, syphilis) → Contact positives                     | £73.57             | 26.2       | £65.57                | 16.1       |
| <b>Sexual health screen for symptomatic patients</b>                                                                  |                                                                                                                                                                                                                                          |                    |            |                       |            |
| Current                                                                                                               | Consultation → Exam/Sample collection* <sup>†</sup> → Microscopy → Health promotion → Off-site sample processing (1-2 weeks) → Results management → Contact positives                                                                    | £99.38             | 47.2       | £73.82                | 22.3       |
| POC1                                                                                                                  | Consultation → Exam/Sample collection* <sup>†</sup> → POCT (90 minutes) → Microscopy → Health promotion → Results management (POCT) → Off-site sample processing (1-2 weeks) → Results management (HIV, syphilis) → Contact positives    | £100.39            | 52.2       | £74.98                | 27.3       |
| POC2                                                                                                                  | Sample collection* <sup>‡</sup> → POCT (90 minutes) → Consultation/Results (POCT) → Exam / Sample collection <sup>†</sup> → Microscopy → Off-site sample processing (1-2 weeks) → Results management (HIV, syphilis) → Contact positives | £84.46             | 36.2       | £70.72                | 21.1       |
| <b>B) Treatment Pathways</b>                                                                                          |                                                                                                                                                                                                                                          |                    |            |                       |            |
| Chlamydia                                                                                                             | Results → Treatment → Partner notification → Supported partner notification                                                                                                                                                              | £34.89             | 23.5       | £24.99                | 13.5       |
| Gonorrhoea 1 <sup>st</sup> visit                                                                                      | Exam / Sample collection* (for NG culture) → Treatment → Health promotion / Partner notification → Off-site sample processing → Supported partner notification                                                                           | £72.07             | 51.0       | £61.88                | 38.0       |
| Gonorrhoea 2 <sup>nd</sup> visit TOC Current                                                                          | Sample collection* (for NG culture and NAAT) → Off-site sample processing (1-2 weeks) → Results management                                                                                                                               | £39.98             | 20         | £32.89                | 10         |
| Gonorrhoea 2 <sup>nd</sup> visit TOC POC                                                                              | Sample collection* (for NG culture and POCT) → POCT (90 min) → Off-site sample processing (for NG culture, 2-4 days) → Results management                                                                                                | £45.87             | 20         | £38.77                | 10         |

**Figure 1. Comparison of current and proposed POC clinical pathways for chlamydia and gonorrhoea testing and treatment.** The clinical pathway steps for chlamydia and gonorrhoea (A) testing and (B) treatment are shown along with cost per patient and minutes of health care professionals' time for each pathway when delivered as either a primary or an additional pathway. The first step, patient registration, is common to all pathways and is not shown. Alternative POC pathways proposed by different clinics are reported as POC1 and POC2. The cost of POC pathways may vary by -£5/+£7 based on volume of tests performed. NG, *Neisseria gonorrhoeae*. TOC, test of cure performed four weeks after initial treatment for gonorrhoea. \*Urine/vulvo-vaginal swab collected for chlamydia and gonorrhoea testing. <sup>†</sup>Blood sample collected for HIV and syphilis testing. <sup>‡</sup>Patients would drop off sample and book an appointment later in the day for their consultation and results.

## ONLINE SUPPLEMENTARY MATERIALS

**Clinical care pathways using chlamydia and gonorrhoea tests are evolving: point of care nucleic acid amplification tests may reduce genitourinary medicine service delivery costs**

### **I. Supplementary Methods**

A. Clinical pathways and steps

B. Building chlamydia and gonorrhoea clinical pathways

C. Cost model

### **II. Table A: Cost inputs used in the model**

### **III. Table B: Pathway step descriptions**

### **IV. Table C: Additional chlamydia and gonorrhoea testing and treatment pathways**

### **V. Table D: Potential benefits/concerns of POCT**

### **VI. References**

## Supplementary Methods

### A) Clinical pathways and steps

Each of the pathways comprises a number of steps; each step has a number of elements which have costs associated with them or are used to scale the costs (e.g. the proportion of patients who go through that step).

These elements are:

Step components:

- Proportion of patients who go through the step (activity)
- Length of time (minutes) to complete the step
- Grade of staff/staff blend
- Non-staff resources required: consumables, drugs and pathology
- Proportion of the time, if the step is delivered in conjunction with another pathway

For most steps in the pathway a blend of staff is likely to be involved, for example, any grade of nurse. These were explicitly modelled and such combinations were taken from the Integrated London Sexual Health Tariff [1,2].

If two pathways are delivered at the same time, one would be considered as the primary pathway and the other as an additional pathway, in terms of costing. Efficiencies with staff time are generated when more than one pathway is delivered during a consultation, but the full amount of non-staff inputs are still needed as these are specific to the pathway being delivered. For example, the initial registration or health promotion steps would not occur twice, but any non-staff consumables would be required at 100%.

### B) GUM Clinic Workshops

We chose a variety of clinics for the workshops to obtain as wide a range of opinions as possible given a small sample size. These included a traditional GUM clinic, a fully integrated sexual health clinic with STI and contraception offered, and one with a large proportion of individuals from high-risk groups. A lead clinician at each clinic was asked to invite his or her coworkers, and to encourage a wide range of participation. These workshops were organized during allocated staff training sessions so as not to interfere with normal working hours. Staff were all made aware of the purpose of the workshop, that detailed notes would be taken on what was said during the workshops, and that the information would be used to build consensus pathways and cost them out. All staff were made aware that the goal was to present our findings as a peer reviewed publication; consent



was implicitly given by attendance. Workshops were attended by a range of clinical and administrative staff including, at a minimum, one consultant, one nurse (Band 7/8), one health advisor, and one administrator. Each workshop lasted between 60-90 minutes.

### C) Building chlamydia and gonorrhoea clinical pathways

The pathways were created using an iterative methodology. First, the research team reviewed the current pathways from the published Integrated London Sexual Health Tariff [1] and proposed new patient pathways using a chlamydia/gonorrhoea POCT to prompt discussions at the first workshop. During each workshop we asked open-ended questions about the clinic's current care pathways and possible modifications if a chlamydia/gonorrhoea POC NAAT were available. Questions considered patient flow, time from test to treatment, and the total number of clinical steps or time which would be reduced by using POC NAAT. We also captured the benefits and limitations of using and implementing a chlamydia/gonorrhoea POC NAAT in clinical practice. Subsequent workshops built on the pathways generated at previous workshops, refining them or creating new ones if their care delivery varied significantly. Costs were not considered during the workshops. We returned all of the pathways to the study team and workshop participants at the end of the study, asking for any final comments and to obtain consensus around the pathway detail.

### C) Cost model

The total pathway cost = (Cost Step 1) + (Cost Step 2) + ... + (Cost Step N).

$$\text{Cost Step } N_{\text{Primary}} = A \times \left( M \times ((C_{s1} \times Q_{s1}) + (C_{s2} \times Q_{s2}) + \dots + (C_{sN} \times Q_{sN})) + \sum C_{\text{Cons}} \times Q + \sum \right)$$

If the proportion additional is 0, then Cost Step  $N_{\text{Additional}} = 0$ , else

$$\text{Cost Step } N_{\text{Additional}} = A \times \left( \text{Add} \times M \times ((C_{s1} \times Q_{s1}) + (C_{s2} \times Q_{s2}) + \dots + (C_{sN} \times Q_{sN})) + \sum C_{\text{Cons}} \times Q \right)$$

Where A is the activity, M is the number of minutes, C is the cost, Q is the quantity/proportion,  $s_1, s_2 \dots s_N$  are the different staff grades/blends, Cons is consumables, Path is pathology and Add is the proportion additional.

1  
2 We made some general assumptions about the pathways when information was not available from the focus  
3 groups. This was done to ensure some consistency in the pathways. There were:  
4

- 5 • Patient registration step – 5 minutes, 100% admin clerical, 0% as an additional pathway. The cost of  
6 patient registration is included in the total pathway cost, but is not shown in Figure 1 for simplicity.
- 7 • Both standard care and POCT testing pathways require sample collection instructions, gloves, urine pot  
8 and vulvo-vaginal swab.
- 9 • For asymptomatic patients, 70% would be a urine sample and 30% would be a vulvo-vaginal swab. This  
10 is based on 100% of men providing urine, and 60% of women providing a urine sample.
- 11 • The health promotion step always includes the consumables: KY lubricant (x2), STI literature (x3), male  
12 condoms (x10). Where no health promotion step is included, we added the same consumables to the  
13 consultation.
- 14 • For standard care pathways, the results management step is done by a 5/6 Nurse (6 minutes), 95% SMS  
15 text message, 2% letter notification, 3% telephone notification.
- 16 • For POCT pathways, the results management step is done by a 5/6 Nurse (6 minutes), with all patients  
17 receiving results by SMS text message, and of those 2% and 3% also receive results by letter or telephone  
18 notification, respectively.
- 19 • For standard care and POCT pathways, the step for contacting those with a positive or equivocal test  
20 results requires 90% SMS text message, 5% letter notification, 5% telephone notification.
- 21 • Microscopy is done for all symptomatic patients and is 10 minutes of a 5/6 Nurse, using blotting paper,  
22 gloves, gram stain, immersion oil, loops and a slide.
- 23 • Blood tests all include bandages/plaster, blood tube, cotton wool, gloves, needle, sterets/antiseptic wipe,  
24 syringe, transport tube and vacutainer.
- 25 • The proportion additional time was taken from pathways in the Integrated London Sexual Health Tariff  
26 [1] as this was not specifically discussed in the focus groups.  
27  
28  
29  
30  
31  
32  
33  
34  
35  
36  
37  
38  
39  
40  
41  
42  
43  
44  
45  
46  
47  
48  
49  
50  
51  
52  
53  
54  
55  
56  
57  
58  
59  
60

**Table A: Cost inputs used in the model; taken from the Integrated Sexual Health Tariff [1,2]**

| Type        | Item                                             | Cost  | Unit        |
|-------------|--------------------------------------------------|-------|-------------|
| Staff       | Blend Doctor - N7/8                              | 1.45  | Minute      |
| Staff       | Blend Nurse 7/8                                  | 1.10  | Minute      |
| Staff       | Blend all com SRH N2 - Dr                        | 1.06  | Minute      |
| Staff       | Blend Health Adviser                             | 1.03  | Minute      |
| Staff       | Blend Nurse 5/6/7/8                              | 0.89  | Minute      |
| Staff       | Blend Nurse 5/6                                  | 0.75  | Minute      |
| Staff       | Admin/clerical                                   | 0.53  | Minute      |
| Pathology   | Cepheid PoC CT/GC Test                           | 18.00 | Sample      |
| Pathology   | Chlamydia & Gonorrhoea NAAT                      | 12.51 | Sample      |
| Pathology   | GC Culture/typing - lab processing               | 7.55  | Sample      |
| Pathology   | GC NAAT                                          | 12.00 | Sample      |
| Pathology   | Gonorrhoea Culture                               | 4.54  | Sample      |
| Pathology   | HIV Serology                                     | 52.80 | Sample      |
| Pathology   | HIV Serum test (4th Generation)                  | 12.78 | Sample      |
| Pathology   | Syphilis Immunoassy - Total antibody (IgG & IgM) | 16.50 | Sample      |
| Consumables | Bandages/ plasters                               | 0.07  | Item        |
| Consumables | Blood tube                                       | 0.12  | Item        |
| Consumables | Blotting paper                                   | 0.05  | Item        |
| Consumables | Chlamydia - Local Leaflet                        | 0.06  | Item        |
| Consumables | Chlamydia - National Leaflet                     | 0.06  | Item        |
| Consumables | Cotton Wool                                      | 0.01  | Item        |
| Consumables | Cover Slip                                       | 0.65  | Item        |
| Consumables | CT/GC Swab (cervical/endocervical)               | 1.56  | Item        |
| Consumables | Culture plate                                    | 1.04  | Item        |
| Consumables | Culture swab- GC                                 | 1.04  | Item        |
| Consumables | Dark ground microscopy kit                       | 0.21  | Use         |
| Consumables | Gloves                                           | 0.05  | Pair        |
| Consumables | Gonorrhoea Leaflet                               | 0.06  | Item        |
| Consumables | Gram Stain                                       | 0.20  | Procedure   |
| Consumables | Immersion oil                                    | 0.02  | Sample      |
| Consumables | Kit assembly costs - Chlamydia                   | 3.22  | Item        |
| Consumables | KY Lubricant                                     | 0.30  | Application |
| Consumables | Lab Request form with bag                        | 0.10  | Item        |
| Consumables | Laboratory/pathology request form                | 0.26  | Item        |
| Consumables | Letter notification                              | 0.58  | Item        |
| Consumables | Literature (STI)                                 | 0.06  | Item        |
| Consumables | Loops                                            | 0.60  | Item        |
| Consumables | Male Condom                                      | 0.06  | Item        |
| Consumables | Microscope slide (qty 1)                         | 0.07  | Item        |
| Consumables | Needle                                           | 0.03  | Item        |

| Type        | Item                                            | Cost | Unit             |
|-------------|-------------------------------------------------|------|------------------|
| Consumables | Paper                                           | 0.02 | Item             |
| Consumables | pH paper                                        | 0.10 | Item             |
| Consumables | Phone call                                      | 0.07 | Minute           |
| Consumables | PN slip                                         | 0.05 | Item             |
| Consumables | Saline                                          | 0.20 | Item             |
| Consumables | Sample Collection Instructions                  | 0.05 | Item             |
| Consumables | Slide                                           | 0.05 | Item             |
| Consumables | SMS Text message                                | 0.10 | Item             |
| Consumables | Speculum                                        | 0.82 | Item             |
| Consumables | Stains for microscopy                           | 0.65 | Item             |
| Consumables | Sterets/antiseptic wipe                         | 0.02 | Item             |
| Consumables | Swab                                            | 0.02 | Item             |
| Consumables | Syringe 10ml Luer Slip Syringe                  | 0.11 | Item             |
| Consumables | Transport tube                                  | 0.26 | Item             |
| Consumables | Urine Pot, sterile collection                   | 0.23 | Item             |
| Consumables | Urine Specimen Container (PCR Tube and Pipette) | 1.04 | Item             |
| Consumables | Vacutainer                                      | 0.02 | Item             |
| Consumables | Vulvo-vaginal swab                              | 0.16 | Sample           |
| Drugs       | Azithromycin (1000 mg)                          | 4.50 | Treatment Course |
| Drugs       | Ceftriaxone (500 mg)                            | 5.09 | Treatment Course |

**Table B: Descriptions of clinical steps involved in chlamydia / gonorrhoea testing and treatment pathways.**

| Step name                      | Activity                                                                                                                                                                                                                                                                                           |
|--------------------------------|----------------------------------------------------------------------------------------------------------------------------------------------------------------------------------------------------------------------------------------------------------------------------------------------------|
| Consultation                   | Meet with clinician, discuss reason for attendance and any other issues, e.g. risk behaviour.                                                                                                                                                                                                      |
| Contact positives              | For patients with a positive or equivocal test result, extra time is allocated to ensure that they receive their result and attend for treatment, e.g. extra phone calls and follow-up.                                                                                                            |
| Exam                           | Clinical examination including physical genital exam, with swabs or samples taken as appropriate.                                                                                                                                                                                                  |
| Health Promotion               | Discussion around safer sex and reducing risk behaviours.                                                                                                                                                                                                                                          |
| Microscopy                     | Samples (genital swabs) prepared and read in the clinic laboratory.                                                                                                                                                                                                                                |
| Off-site sample processing     | External step – sample is sent off-site for laboratory processing.                                                                                                                                                                                                                                 |
| Partner notification           | Discussion around importance of having partners notified and treated, and whether patients need assistance in reaching partners.                                                                                                                                                                   |
| Patient registration           | The patient registers, either face to face with a receptionist/administrator, or using an electronic kiosk or computer, and asked about reason for attendance, symptoms, risk factors, etc. A pro forma is often used. This step includes time to retrieve patient notes.                          |
| POCT                           | Chlamydia/gonorrhoea point of care test: staff process urine sample or swab, prepare cartridge for POC NAAT machine, and retrieve and review results.                                                                                                                                              |
| Prepare test kits              | Make the test kits for the self-service machines in clinics.                                                                                                                                                                                                                                       |
| Receive samples                | Process and prepare self-collected samples to be sent for off-site sample processing or processed in POC test.                                                                                                                                                                                     |
| Results                        | Consultation with patients about their positive results (negative result generally does not require a consultation).                                                                                                                                                                               |
| Results management             | Managing the results when they come in from the laboratory (e.g. inputting on IT system) or the POCT if patients have already left the clinic, notifying patients of their results by text message (~95%), letter or by telephone call, and requesting that positive patients return for treatment |
| Sample collection              | Urine or vaginal swab samples taken for chlamydia and gonorrhoea NAAT testing, and/or blood samples obtained for HIV and syphilis testing, and/or swabs taken for gonorrhoea culture. Staff process samples and prepare for testing (either sent to an off-site laboratory or POCT in the clinic). |
| Supported partner notification | Clinic staff will notify partners for patients requesting assistance.                                                                                                                                                                                                                              |
| Treatment                      | Drugs given in clinic, along with advice on safer sex.                                                                                                                                                                                                                                             |

**Table C: Additional chlamydia and gonorrhoea testing and treatment pathways.**

| Pathway                                                                                            | Clinical steps                                                                                                                   | As Primary Pathway |            | As Additional Pathway |            |
|----------------------------------------------------------------------------------------------------|----------------------------------------------------------------------------------------------------------------------------------|--------------------|------------|-----------------------|------------|
|                                                                                                    |                                                                                                                                  | Cost per patient   | Time (min) | Cost per patient      | Time (min) |
| <b>A) Rapid sexual health screening for asymptomatic patients.</b>                                 |                                                                                                                                  |                    |            |                       |            |
| Asymptomatic Rapid SHS (current)                                                                   | Consultation / Sample collection* <sup>†</sup> → Off-site sample processing (1-2 weeks) → Results management → Contact positives | £62.16             | 21.2       | £54.17                | 11.1       |
| <b>B) Current and proposed self-service pathways for asymptomatic patients.</b>                    |                                                                                                                                  |                    |            |                       |            |
| Asymptomatic Self-service (current)                                                                | Prepare kits → Receive sample → Off-site sample processing (1-2 weeks) → Results management → Contact positives                  | £24.37             | 14.9       | £23.70                | 14.2       |
| Asymptomatic Self-service POC (proposed)                                                           | Prepare kits → Receive sample → POCT (90 min) → Results management → Contact positives                                           | £32.60             | 14.9       | £31.94                | 14.2       |
| <b>C) Gonorrhoea follow up visit for second line treatment after failure of initial treatment.</b> |                                                                                                                                  |                    |            |                       |            |
| 2 <sup>nd</sup> Gonorrhoea treatment (current)                                                     | Exam → Treatment → Health promotion / Partner notification                                                                       | £41.07             | 35.0       | £33.97                | 25.0       |

**Table C: Additional chlamydia and gonorrhoea testing and treatment pathways.** Pathway steps, cost per patient, and health care professionals' time is shown. The first step, patient registration, is common to all pathways and is not shown. Detailed descriptions of all clinical steps are provided in Table B. **(A) Rapid sexual health screening for asymptomatic patients.** After registration, patients have a combined short consultation and blood test for syphilis and HIV, provide a self-collected sample for chlamydia and gonorrhoea (urine for men and self-taken vaginal swab for women), and then leave the clinic. In some cases, a rapid HIV test would be given instead of the standard HIV laboratory test if deemed appropriate and available, such as in high-risk groups like men who have sex with men or those with multiple partners. \*Urine/vulvo-vaginal swab collected for chlamydia and gonorrhoea testing. <sup>†</sup>Blood sample collected for HIV and syphilis testing. **(B) Current and proposed self-service pathways for asymptomatic patients.** In self-service testing, patients register at a machine, and if no symptoms are reported, they are offered a chlamydia/gonorrhoea test and/or pregnancy test. Patients then drop off a self-provided sample in the clinic and leave, with no direct clinical contact. Results management follows, in which most patients would receive a text message (SMS) of their results, with extra time allowed to ensure positives are contacted and attend for treatment. **(C) Gonorrhoea follow up visit for second line treatment after failure of initial treatment.** In the case of primary treatment failure, a follow-up visit is necessary for second-line gonorrhoea treatment with cefixime and azithromycin.

**Table D: Potential benefits and limitations of a POC NAAT for chlamydia and gonorrhoea in a GUM clinic.**

| <b>Benefits</b>                                                                                                                                          | <b>Concerns/considerations</b>                                                                                                                                                     |
|----------------------------------------------------------------------------------------------------------------------------------------------------------|------------------------------------------------------------------------------------------------------------------------------------------------------------------------------------|
| Same day diagnosis and treatment for positive patients, improving treatment rates and preventing onward transmission, reducing the risk of complications | Staff time would be diverted from patient contact to running the test                                                                                                              |
| Quicker results for patients, alleviating anxiety                                                                                                        | Staff would need to be trained in running the test and reporting results                                                                                                           |
| One clinic visit for positive patients rather than two visits (one for the test and one for treatment)                                                   | Changes in how services are managed and workflow                                                                                                                                   |
| Reducing overtreatment from presumptive treatment, to minimise development of antimicrobial resistance                                                   | Some patients may get results in two hours, others may have to wait longer if capacity has not been planned properly, although capacity is very flexible and can be changed easily |
| Potential to reduce the number of clinic visits, which means more time available to other patients                                                       | Implications of reducing the number of samples sent to laboratories, e.g. clinics may have contracts in place, and loss of business to central laboratories                        |
| Greater confidence for clinicians in providing quick and appropriate treatment                                                                           | Clinics may need to assume responsibility for quality assurance of testing and reporting                                                                                           |
| Attracting new clients who would not normally come in for a test                                                                                         | Other tests may become available in the near future, yet clinics would be tied into a contract if they are early adopters                                                          |
| Reduces the number of people lost to follow up i.e. test positive but do not return for treatment                                                        | Could result in loss of income to clinic in standard first / follow up tariff payment system                                                                                       |
| Fast track testing service for partners reducing the need for presumptive treatment                                                                      | Patients may need to wait in the clinic for their results for 2 hours                                                                                                              |
| Efficiencies realised in clinic enable capacity to be released and utilised elsewhere                                                                    |                                                                                                                                                                                    |

## References

1. Pathway Analytics. Sexual Health Tariff. <http://www.pathwayanalytics.com/cms/sh-tariff> Last accessed: 21/1/2013
2. London Sexual Health Programme. The Sexual Health Tariff. <http://www.londonsexualhealth.org/projects/tariffs.html> Last accessed: 18/1/2013

# BMJ Open

**Patient care pathways using chlamydia and gonorrhoea tests are evolving: point of care nucleic acid amplification tests may reduce genitourinary medicine service delivery costs.**

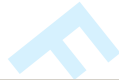

|                                 |                                                                                                                                                                                                                                                                                                                                                                                                                                                                                                                                                                                                                                      |
|---------------------------------|--------------------------------------------------------------------------------------------------------------------------------------------------------------------------------------------------------------------------------------------------------------------------------------------------------------------------------------------------------------------------------------------------------------------------------------------------------------------------------------------------------------------------------------------------------------------------------------------------------------------------------------|
| Journal:                        | <i>BMJ Open</i>                                                                                                                                                                                                                                                                                                                                                                                                                                                                                                                                                                                                                      |
| Manuscript ID:                  | bmjopen-2014-005322.R1                                                                                                                                                                                                                                                                                                                                                                                                                                                                                                                                                                                                               |
| Article Type:                   | Research                                                                                                                                                                                                                                                                                                                                                                                                                                                                                                                                                                                                                             |
| Date Submitted by the Author:   | 02-Jul-2014                                                                                                                                                                                                                                                                                                                                                                                                                                                                                                                                                                                                                          |
| Complete List of Authors:       | Adams, Elisabeth; Aquarius Population Health, ; University of Bristol, School of Social and Community Medicine<br>Ehrlich, Alice; Aquarius Population Health,<br>Turner, Katy; Bristol University<br>Shah, Kunj; Aquarius Population Health,<br>Macleod, John; University of Bristol<br>Goldenberg, Simon; Guy's & St. Thomas' NHS Foundation Trust and King's College,<br>Meray Patel, Robin; Aquarius Population Health,<br>Pearce, Vikki; V. Pearce Consulting,<br>Horner, Paddy; University of Bristol, School of Social and Community Medicine; University Hospitals Bristol NHS Foundation Trust, Bristol Sexual Health Centre |
| <b>Primary Subject Heading</b>: | Sexual health                                                                                                                                                                                                                                                                                                                                                                                                                                                                                                                                                                                                                        |
| Secondary Subject Heading:      | Diagnostics, Health economics, Health services research, Infectious diseases                                                                                                                                                                                                                                                                                                                                                                                                                                                                                                                                                         |
| Keywords:                       | GENITOURINARY MEDICINE, HEALTH ECONOMICS, HEALTH SERVICES ADMINISTRATION & MANAGEMENT, Organisation of health services < HEALTH SERVICES ADMINISTRATION & MANAGEMENT, SEXUAL MEDICINE, Health economics < HEALTH SERVICES ADMINISTRATION & MANAGEMENT                                                                                                                                                                                                                                                                                                                                                                                |
|                                 |                                                                                                                                                                                                                                                                                                                                                                                                                                                                                                                                                                                                                                      |

SCHOLARONE™  
Manuscripts



**TITLE**

Research: Patient care pathways using chlamydia and gonorrhoea tests are evolving: point of care nucleic acid amplification tests may reduce genitourinary medicine service delivery costs.

**CORRESPONDING AUTHOR**

Elisabeth Adams, Aquarius Population Health Limited, Engine Shed, Station Approach, Temple Meads, Bristol BS1 6QH; tel +44 (0) 207 993 2930; elisabeth.adams@aquariusph.com

**AUTHORS**

Elisabeth J Adams<sup>1,2</sup>, Alice Ehrlich<sup>1</sup>, Katherine ME Turner<sup>2</sup>, Kunj Shah<sup>1</sup>, John Macleod<sup>2</sup>,

Simon Goldenberg<sup>3</sup>, Robin K Meray<sup>1</sup>, Vikki Pearce<sup>4</sup>, Patrick Horner<sup>2,5</sup>

**AFFILIATIONS**

1 – Aquarius Population Health Limited, Bristol, UK

2 – School of Social and Community Medicine, University of Bristol, Bristol, UK

3 – Centre for Clinical Infection & Diagnostics Research, Guy's & St. Thomas' NHS Foundation Trust and King's College, London, UK

4 – V. Pearce Consulting Ltd, Hove, UK

5 – Department of Genitourinary Medicine, NHS Bristol, Bristol UK

**KEYWORDS**

Point of care technology, diagnostic test, gonorrhoea, chlamydia, costs and cost analysis

**WORD COUNT**

2914

## ABSTRACT

### Objectives

We aimed to explore patient pathways using a chlamydia/gonorrhoea point of care (POC) nucleic acid amplification test (NAAT), and estimate and compare the costs of the proposed POC pathways with the current pathways using standard laboratory-based NAAT testing.

### Design/Participants

Workshops were conducted with health care professionals at four sexual health clinics representing diverse models of care in the UK. They mapped out current pathways that used chlamydia/gonorrhoea tests, and constructed new pathways using a POC NAAT. Healthcare professionals' time was assessed in each pathway.

### Outcome measure

The proposed POC pathways were then priced using a model built in Microsoft Excel, and compared to previously published costs for pathways using standard NAAT-based testing in an off-site laboratory.

### Results

Pathways using a POC NAAT for asymptomatic and symptomatic patients and chlamydia/gonorrhoea-only tests were shorter and less expensive than most of the current pathways. Notably, we estimate that POC testing as part of a sexual health screen for symptomatic patients, or as stand-alone chlamydia/gonorrhoea testing, could reduce costs per patient by as much as £16 or £6, respectively. In both cases, health care professionals' time would be reduced by approximately 10 minutes per patient.

### Conclusions

POC testing for chlamydia/gonorrhoea in a clinical setting may reduce costs and clinician time, and may lead to more appropriate and quicker care for patients. Further study is warranted on how to best implement POC testing in clinics, and on the broader clinical and cost implications of this technology.

**STRENGTHS AND LIMITATIONS OF THIS STUDY**

- The main strength of this study is that it presents the first estimates of the costs of implementing chlamydia and gonorrhoea point of care testing compared to standard care (off-site laboratory processing of samples) in genitourinary medicine clinics, presenting a consensus from four clinics across England representing a range of service delivery models.
- The main limitation is that this is based on expert clinical opinion, rather than prospectively collected data, as point of care testing for chlamydia and gonorrhoea had not yet been implemented in England when this study was conducted.

## INTRODUCTION

*Chlamydia trachomatis* and *Neisseria gonorrhoea* are common sexually transmitted infections, and if untreated may cause pelvic inflammatory disease, which can result in serious reproductive sequelae such as tubal factor infertility and ectopic pregnancy.[1-3]

Typically, the nucleic acid amplification test result for chlamydia and gonorrhoea is available within a week from an off-site laboratory, but it can sometimes be over two weeks until the patient receives treatment, and some patients may not return for treatment.[4,5] If the results of these tests could be available at a single visit, outcomes could be improved by achieving earlier treatment and partner notification, minimising the risk of onward transmission and developing complications.[6-8] Such a service would also likely be more convenient for patients.[7-9]

This could be achieved with sensitive and specific NAAT point of care tests (POCTs), which have recently become available. One such test, Cepheid Xpert® CT/NG (Cepheid, Sunnyvale, CA, USA), has at least equivalent performance to traditional laboratory based NAATs, providing results within 90 minutes of specimen collection.[10]

We have developed a model that enables us to evaluate the components of care pathways and associated costs. In this report we review current patient pathways in sexual health clinics that include chlamydia and gonorrhoea testing and treatment, explore and map new pathways to incorporate chlamydia and gonorrhoea POC testing efficiently in GUM (genitourinary medicine) clinics in the UK, estimate the costs of the new pathways, and compare the costs with the current pathways using standard laboratory-based NAATs.

## METHODS

Patient pathways using chlamydia/gonorrhoea POCTs were developed during workshops at four sexual health clinics, attended by three to fifteen staff members across all clinic staff grades. Pathways were based on expert opinion given to us during the workshops, rather than any actual patient flow data. To increase applicability of the pathways across different service types, we chose a range of clinics with diverse services and service delivery. Urban and rural clinics (two in the South West of England and two in London), those providing either GUM or integrated sexual health services, and those serving higher-risk populations were represented. Based on staff input, patient pathways were constructed to model the consecutive clinical steps involved in testing and treatment, both for POC pathways and also current service delivery (standard care).

1  
2  
3 A model was built in Microsoft Excel to replicate pathway steps and estimate costs. We assumed the perspective  
4 of the National Health Service (NHS), and only clinical costs were included (£UK2012); patient time and  
5 associated costs were excluded. The staff cost per minute included indirect and overhead costs. Standard off-site  
6 laboratory-based chlamydia/gonorrhoea testing costs and all other cost inputs were taken from previously  
7 published sources using an identical modelling approach,[11] to allow for direct comparison between current  
8 standard pathways and proposed POC pathways (Table A in the Supplementary material online: File 1). POCT  
9 costs were based on use of the only currently commercially available chlamydia/gonorrhoea POCT, the Cepheid  
10 Xpert® CT/NG system, with a baseline assumed cost of £18, which includes the cartridge, machine rental,  
11 service, and maintenance, assuming 15,000 tests are done annually (i.e., 60 tests/day, Monday-Friday, an  
12 estimated number of tests for an average genitourinary medicine clinic in England), plus an additional £1.71 for  
13 the Cepheid sample collection materials (data from Cepheid). We varied the POCT cost from £13/test (assuming  
14 20,000 tests or more annually, i.e. large clinic) to £25 (assuming one test/day, very small clinic). These costs  
15 exclude staff training (likely to be 30 minutes per person). This compares to an assumed baseline cost of £12 for  
16 the standard test plus £1.35 for the sample collection materials. We assumed that the standard test cost included  
17 all aspects of test processing including any transportation costs.  
18  
19  
20  
21  
22  
23  
24  
25  
26  
27  
28  
29

30  
31 The outputs of the model were the costs of each testing pathway as a primary pathway (delivered on its own)  
32 and as an additional pathway (delivered in conjunction with other clinical services). To estimate the cost of  
33 additional pathways, staff time was weighted by the proportion of additional time, but all non-staff inputs are  
34 included at full value.  
35  
36  
37  
38

39 The total pathway cost = (Cost Step 1) + (Cost Step 2) + ... + (Cost Step N).  
40  
41

42 Detailed descriptions of patient pathway development and cost modelling are available as Supplementary  
43 materials online: File 1.  
44  
45

## 46 **RESULTS**

47  
48 Patient testing pathways consist of a set of standard steps: patient registration, consultation, clinical  
49 examination, sample collection (blood, urine, and/or vaginal swab), health promotion counselling, off-site  
50 laboratory-based sample processing, on-site POC testing, microscopic analysis of specimens in the clinic, results  
51 counselling, results management (data entry and notifying patients of results), and contacting patients who test  
52 positive to ensure follow-up treatment. Detailed descriptions of each step are available in Table B in the  
53  
54  
55  
56  
57  
58  
59  
60

1  
2  
3 Supplementary material online. The standard and POC pathways differ in which steps are used, time for each,  
4 and order of steps. Chlamydia and gonorrhoea testing may be carried out as either stand-alone testing or as part  
5 of a full sexual health screen including additional testing for syphilis and HIV. The sexual health screen for  
6 asymptomatic versus symptomatic patients differs in that the latter includes a clinical examination, culture for  
7 gonorrhoea, and microscopy. The steps of these pathways are shown, along with costs and clinician time, in  
8 Table 1A. There are two proposed sexual health screen pathways using POC testing, given as POC1 and POC2.  
9  
10  
11  
12  
13  
14 Details of all resources used are given in the online Supplementary materials online: File 2.  
15  
16  
17  
18  
19  
20  
21  
22  
23  
24  
25  
26  
27  
28  
29  
30  
31  
32  
33  
34  
35  
36  
37  
38  
39  
40  
41  
42  
43  
44  
45  
46  
47  
48  
49  
50  
51  
52  
53  
54  
55  
56  
57  
58  
59  
60

**Table 1: Comparison of current and proposed point of care clinical pathways for chlamydia and gonorrhoea testing and treatment**

| Pathway                                               | Clinical Steps                                                                                                                                                                                                                           | As Primary Pathway |            | As Additional Pathway |            |
|-------------------------------------------------------|------------------------------------------------------------------------------------------------------------------------------------------------------------------------------------------------------------------------------------------|--------------------|------------|-----------------------|------------|
|                                                       |                                                                                                                                                                                                                                          | Cost per patient   | Time (min) | Cost per patient      | Time (min) |
| <b>A) Testing Pathways</b>                            |                                                                                                                                                                                                                                          |                    |            |                       |            |
| <b>Chlamydia and gonorrhoea only</b>                  |                                                                                                                                                                                                                                          |                    |            |                       |            |
| Current                                               | Consultation → Sample collection* → Health promotion → Off-site sample processing (1-2 weeks) → Results management → Contact positives                                                                                                   | £45.34             | 32.8       | £28.65                | 15.7       |
| POC                                                   | Consultation → Sample collection* → POCT (90 minutes) → Results management → Contact positives                                                                                                                                           | £38.76             | 21.8       | £32.59                | 13.4       |
| <b>Sexual health screen for asymptomatic patients</b> |                                                                                                                                                                                                                                          |                    |            |                       |            |
| Current                                               | Consultation → Sample collection* <sup>†</sup> → Health promotion → Off-site sample processing (1-2 weeks) → Results management → Contact positives                                                                                      | £79.77             | 37.2       | £54.86                | 12.3       |
| POC1                                                  | Consultation → Sample collection* <sup>†</sup> → POCT (90 minutes) → Results management (POCT) → Off-site sample processing (1-2 weeks) → Results management (HIV, syphilis) → Contact positives                                         | £77.42             | 31.2       | £69.43                | 21.1       |
| POC2                                                  | Sample collection* <sup>†</sup> → POCT (90 minutes) → Consultation/Results (POCT) → Sample collection <sup>†</sup> → Off-site sample processing (1-2 weeks) → Results management (HIV, syphilis) → Contact positives                     | £73.57             | 26.2       | £65.57                | 16.1       |
| <b>Sexual health screen for symptomatic patients</b>  |                                                                                                                                                                                                                                          |                    |            |                       |            |
| Current                                               | Consultation → Exam/Sample collection* <sup>†</sup> → Microscopy → Health promotion → Off-site sample processing (1-2 weeks) → Results management → Contact positives                                                                    | £99.38             | 47.2       | £73.82                | 22.3       |
| POC1                                                  | Consultation → Exam/Sample collection* <sup>†</sup> → POCT (90 minutes) → Microscopy → Health promotion → Results management (POCT) → Off-site sample processing (1-2 weeks) → Results management (HIV, syphilis) → Contact positives    | £100.39            | 52.2       | £74.98                | 27.3       |
| POC2                                                  | Sample collection* <sup>†</sup> → POCT (90 minutes) → Consultation/Results (POCT) → Exam / Sample collection <sup>†</sup> → Microscopy → Off-site sample processing (1-2 weeks) → Results management (HIV, syphilis) → Contact positives | £84.46             | 36.2       | £70.72                | 21.1       |
| <b>B) Treatment Pathways</b>                          |                                                                                                                                                                                                                                          |                    |            |                       |            |
| Chlamydia                                             | Results → Treatment → Partner notification → Supported partner notification                                                                                                                                                              | £34.89             | 23.5       | £24.99                | 13.5       |
| Gonorrhoea 1 <sup>st</sup> visit                      | Exam / Sample collection* (for NG culture) → Treatment → Health promotion / Partner notification → Off-site sample processing → Supported partner notification                                                                           | £72.07             | 51.0       | £61.88                | 38.0       |
| Gonorrhoea 2 <sup>nd</sup> visit TOC Current          | Sample collection* (for NG culture and NAAT) → Off-site sample processing (1-2 weeks) → Results management                                                                                                                               | £39.98             | 20         | £32.89                | 10         |
| Gonorrhoea 2 <sup>nd</sup> visit TOC POC              | Sample collection* (for NG culture and POCT) → POCT (90 min) → Off-site sample processing (for NG culture, 2-4 days) → Results management                                                                                                | £45.87             | 20         | £38.77                | 10         |

**Table 1. Comparison of current and proposed POC clinical pathways for chlamydia and gonorrhoea testing and treatment.** The clinical pathway steps for chlamydia and gonorrhoea (A) testing and (B) treatment are shown along with cost per patient and minutes of health care professionals' time for each pathway when delivered as either a primary or an additional pathway. The first step, patient registration, is common to all pathways and is not shown. Alternative POC pathways proposed by different clinics are reported as POC1 and POC2. The cost of POC pathways may vary by -£5/+£7 based on volume of tests performed. NG, *Neisseria gonorrhoea*. TOC, test of cure performed four weeks after initial treatment for gonorrhoea. \*Urine/vulvo-vaginal swab collected for chlamydia and gonorrhoea testing. <sup>†</sup>Blood sample collected for HIV and syphilis testing. <sup>‡</sup>Patients would drop off sample and book an appointment later in the day for their consultation and results.

1  
2  
3 The lengthiest and most costly pathway for chlamydia/gonorrhoea testing is the sexual health screen for  
4 symptomatic patients. A proposed POC pathway could reduce this cost from £99 to £92 per patient (averaging  
5 POC1 and POC2), and reduce health care professional time from 47 to 44 minutes per patient as a primary  
6 pathway. There was a difference in the two proposed POC pathways for symptomatic patients; namely, POC1  
7 includes a slightly longer consultation for patients (15 minutes versus 10 minutes) and an additional step for  
8 health promotion with a Health Adviser for 6 minutes. A portion of the cost savings arises from eliminating the  
9 need for gonorrhoea culture in symptomatic patients, except for those testing positive by POCT. Reductions in  
10 cost and time with POC testing are also expected for stand-alone chlamydia/gonorrhoea testing and for  
11 asymptomatic sexual health screen pathways, when delivered as primary pathways.  
12  
13  
14  
15  
16  
17  
18  
19

20 In some clinics, asymptomatic patients may be offered a rapid sexual health screen, which utilises laboratory-  
21 based chlamydia/gonorrhoea testing but reduces costs and clinician time by combining certain steps. The rapid  
22 sexual health screen is the most cost- and time-efficient sexual health screen pathway (Table C in the  
23 Supplementary material online: File 1) but may not be appropriate for all patients. In addition, stand-alone  
24 chlamydia/gonorrhoea self-service testing is offered in some clinics, but only to asymptomatic patients;  
25 however, incorporating a POCT into this pathway would increase costs compared to standard care (Table C in  
26 the Supplementary material online: File 1).  
27  
28  
29  
30  
31  
32  
33

34 Table 1B outlines the clinical steps and costs of treating patients for chlamydia or gonorrhoea. Pathway steps  
35 specific to treatment include: gonorrhoea culture for confirmation and antimicrobial sensitivity testing, treatment  
36 with antibiotics, counselling and, if requested, support/assistance with partner notification. A benefit of POC  
37 testing is that patients can initiate treatment during the same visit at which they receive positive diagnosis,  
38 eliminating the need for a follow-up treatment visit, resulting in lower overall cost. For example, under current  
39 practice, it would cost £114.66 to screen and treat a chlamydia positive patient having an asymptomatic screen  
40 (primary screen, £79.77; primary treatment at second attendance, £34.89). This could be reduced to £100.49  
41 with a POCT, as the patient would be treated as part of the same attendance (primary screen, £75.50 [average of  
42 POC1 and POC2]; additional treatment, £24.99).  
43  
44  
45  
46  
47  
48  
49  
50

51 Furthermore, under current practice, some symptomatic patients and partners of positive patients are treated  
52 empirically at their testing visit before laboratory-confirmed results are available. Symptomatic patients treated  
53 presumptively for chlamydia or gonorrhoea infection incur costs of £124.37 and £201.24 per patient,  
54 respectively (primary symptomatic sexual health screen, £99.38; plus additional chlamydia treatment, £24.99; or  
55  
56  
57  
58  
59  
60



1  
2  
3 gonorrhoea treatment including a four-week follow up test of cure, £101.86). If a POCT were used on these  
4 symptomatic patients, the cost of the testing and treatment pathways (averaging POC1 and POC2) would be less  
5 than standard care (chlamydia, £117.42; gonorrhoea, £200.18), and the number of patients treated  
6 inappropriately would be reduced. This could enable more appropriate treatment if a non-specific genital tract  
7 infection is suspected, or potentially no treatment at all which would reduce costs by £24.99 for chlamydia and  
8 £101.86 for gonorrhoea.  
9

## 14 DISCUSSION

15  
16  
17 Our results indicate that the total cost of most chlamydia/gonorrhoea testing pathways in GUM clinics would be  
18 similar or reduced by using POC testing in place of off-site laboratory-based testing, and staff time would be  
19 reduced. In addition to these benefits, POC technologies have the potential to significantly improve sexual  
20 health care, enabling for the first time, accurate chlamydia and gonorrhoea specific diagnoses to be made and  
21 appropriately treated in a single visit. This may reduce the number of onward transmissions, inappropriate  
22 treatments in patients who are chlamydia or gonorrhoea negative but treated presumptively, and prevent pelvic  
23 inflammatory disease in women.[6] Interestingly, many of the proposed POC pathways could inform redesign of  
24 standard pathways without swapping to a POCT. This highlighted that many clinics could improve efficiency in  
25 service delivery even before implementing a POCT.  
26  
27

28  
29  
30 By reducing loss to follow-up, chlamydia/gonorrhoea POC testing could be particularly useful with groups who  
31 are less likely to return for treatment,[2,5,7] including high-risk groups, such as men who have sex with men,  
32 and commercial sex workers. Patients who do not return, or are lost to follow-up, may comprise up to 10% of  
33 all chlamydia diagnoses,[5] although this may be less in GUM clinics. Chlamydia/gonorrhoea POC pathways  
34 could also be implemented in non-GUM settings, such as termination of pregnancy or contraception clinics.

35  
36  
37 Women infected with chlamydia or gonorrhoea are at increased risk of developing pelvic inflammatory disease  
38 following insertion of an intra-uterine device or termination of pregnancy,[12,13] and would benefit from a  
39 rapid diagnosis.[6] With POCTs, novel ways of testing are imaginable, e.g. POCTs could be used in outreach,  
40 with the platform situated in a mobile sexual health testing unit that travels to particular groups such as  
41 commercial sex workers.  
42  
43

44  
45  
46 However, as with any new technology, potential benefits must be weighed with concerns, such as how to best  
47 manage the 90 minute delay before results are available, although this may be more of an issue for clinicians  
48 than patients.[8,9] Due to variation in the way that GUM services are configured and delivered across England,  
49  
50  
51  
52  
53

1  
2  
3 the best way to implement a POC pathway may depend on the specific clinic, based on factors including size of  
4 the clinic, location (e.g. rural vs. urban), patient mix, staff mix, etc. For example, patients could attend in the  
5 morning to register, provide a self-collected sample, and book a slot for later in the day to see a clinician for a  
6 consultation, blood tests, results and treatment if needed. This system of having patients drop off a sample at the  
7 beginning of the day and book in to be seen later may be attractive to patients in an urban setting, where they  
8 could either go back to work/school before their appointment, or spend time in the city centre. Clinics that  
9 currently offer a slot system such as this would easily transition to this type of system using a point of care test,  
10 and patients' treatment could be started on the same day of testing. This system may not work in practice,  
11 however, as patients might give a sample but would not return later.

12  
13  
14 In many rural areas it is not feasible to make two visits on the same day to the clinic since patients may have a  
15 long journey to the GUM clinic. As many clinics experience long waits to be examined and tested, it is possible  
16 that patients would be willing to wait in clinic until the results are back, so as to be treated at the same visit.  
17 Alternatively, patients could register, have a brief consultation with a clinician, have blood samples taken, and  
18 lastly provide a self-collected urine or vaginal swab sample before leaving the clinic. The clinic would later  
19 notify patients of their results with positive patients returning later in the day or the next day. While it would not  
20 offer an instantaneous result, there could still be significant benefits to patients if they were treated the next day  
21 rather than waiting 1-2 weeks as under standard care. Additional benefits and concerns of POC pathways are  
22 presented in Table D in the Supplementary material online: File 1.

23  
24  
25 We anticipate that POC testing may also reduce costs associated with testing and treating partners of  
26 chlamydia/gonorrhoea positive patients and improve antimicrobial stewardship, an international priority.[14,15]  
27 Standard practice is to offer chlamydia and gonorrhoea treatment presumptively to partners of positive patients  
28 (epidemiological treatment) when they attend for screening.[16,17] As the routine NAAT result is not available  
29 at the time of testing it cannot be used to inform the decision of whether treatment is actually indicated and  
30 contacts will be treated unnecessarily. Currently the results of testing, at the time of epidemiological treatment  
31 of partners, are used for surveillance purposes and if positive, additional partner notification when indicated. If  
32 87.9% and 85.7% of partners of chlamydia and gonorrhoea-positive patients are tested for chlamydia/  
33 gonorrhoea at the same time they receive treatment [1] and 36.8% and 33.2% of the partners are positive,  
34 respectively, we estimate that using a POC NAAT on partners before treatment would save £19 and £62 for  
35 partners of chlamydia and gonorrhoea-positive individuals, compared to standard care. For gonorrhoea, we  
36  
37  
38  
39  
40  
41  
42  
43  
44  
45  
46  
47  
48  
49  
50  
51  
52  
53  
54  
55  
56  
57  
58  
59  
60

1  
2  
3 estimate there would be a cost savings if the positivity is less than 93% in partners and 50% undergo  
4 chlamydia/gonorrhoea testing, as the gonorrhoea management pathway is expensive compared to testing. Hence,  
5 efficiency savings may be gained if the prevalence in partners is low, but it would be more costly to use a POC  
6 NAAT on partners first before treatment if a high proportion of partners are positive. However, both scenarios  
7 would reduce overtreatment and therefore improve antimicrobial stewardship in genitourinary  
8 medicine.[14,15,18] Caution may be warranted however, to ensure that potential positive partners are not  
9 missed if they fall outside of the window period for detecting infection.

10  
11  
12 The main limitation of the study, is that pathways are based on expert clinical opinion, rather than prospectively  
13 collected data. This is because at the time the workshops were conducted, point of care testing for chlamydia  
14 and gonorrhoea had not yet been implemented in England. Therefore, it was not possible to validate if the  
15 pathways generated in the workshops were indicative of what happens in actual practice. Our study proposes  
16 several novel chlamydia/gonorrhoea testing pathways using POC technologies which may reduce costs and  
17 health care professionals' time in GUM clinics. Although our study is based on use of the only currently  
18 commercially available chlamydia/gonorrhoea POCT, the Cepheid Xpert CT/NG system, we anticipate that  
19 results would be applicable to other tests with similar performance characteristics. If other tests become  
20 available, their pathway costs could be estimated and compared using the same model. However, these  
21 pathways may not be relevant for POCTs that have lower performance such as some of the previous generation  
22 tests. This is a modelling study based on theoretical pathways and we did not aim to test that the pathways  
23 would work in practice or validate the steps. Once these tests are in clinics, rigorous evaluation is required in  
24 order to ensure that they are delivering the promised benefits at no additional overall cost.

## ACKNOWLEDGEMENTS

Thank you to the clinic leads for organising workshops and all of the staff for their participation: Bristol Sexual Health Clinic, Andrew de Burgh-Thomas and Indrajith Karunaratne – Hope House (Gloucester GUM clinic), Simon Barton and Nneka Nwokolo – 56 Dean Street (Chelsea & Westminster NHS Trust, London), Michael Brady – Camberwell Sexual Health Clinic (Kings College Hospital). Thanks to Pathway Analytics for providing the input data from their model, and finally thanks to Alisha Davies, Jeff Round and Arminder Deol for useful comments on the study and the manuscript.

## CONTRIBUTOR STATEMENT

PH and EA conceived the study idea, EA conducted the workshops, supervised the project, planned the pathway model, analysed and interpreted the model results and drafted the manuscript. PH provided clinical input on the pathways, interpreted model results, and helped draft the manuscript. KS built the pathway model in Excel. AE helped draft the manuscript and provided study support. PH and JM provided expert opinion on the parameter choices and guidance on the structure of the model. SG provided expert knowledge regarding the use of point of care tests from a microbiological context. RM helped draft the manuscript. VP provided expert advice about the sexual health pathways and commissioning/funding. EA, PH, JM and SG contributed to the study design. All authors critically reviewed the paper for content and approved the final submitted version.

## COMPETING INTERESTS

EA has received funding from Atlas Genetics, Astra Zeneca, Bristol University, Cepheid, Gilead, Hologic the Office for Sexual Health, Pathway Analytics and St Georges University and for sexual health consultancy and lectures; PH has received funding from HEFC, BASHH, the Bristol University, Imperial College London, the CPS and Hologic for consultancy, lectures, patents, and providing evidence; KT has received funding from for NIHR for a personal fellowship, and from NHS Bristol Hospitals Health Trust, the Office for Sexual Health and NICE for consultancy. SG has received funding from Cepheid for travel and accommodation for work not related to this submission. EA, SG, RM, VP, Bristol University (PH & JM), AE and KS received funding from Aquarius Population Health for this work. No other conflicts of interest.

1  
2  
3 Authors are independent for the purposes of publication and Cepheid did not have any role in the writing of this  
4 paper or veto over any results published. Cepheid provided funding to Aquarius Population Health to conduct  
5 the study and estimates of the cost of their proprietary Point of Care Test. Other similar tests are, or are soon to  
6 be commercially available. The results presented could be applicable to any other point of care test with similar  
7 performance, cost and usability. We do not make any recommendation as to which test, if any, a clinic should  
8 use.  
9

#### 14 **FUNDING**

15  
16  
17 Cepheid funded Aquarius Population Health to conduct the study.  
18

#### 19 **DATA SHARING STATEMENT**

20  
21 No additional data available  
22  
23  
24  
25  
26  
27  
28  
29  
30  
31  
32  
33  
34  
35  
36  
37  
38  
39  
40  
41  
42  
43  
44  
45  
46  
47  
48  
49  
50  
51  
52  
53  
54  
55  
56  
57  
58  
59  
60

## REFERENCES

1. Public Health England. STI Data Tables. 2012.  
[http://www.hpa.org.uk/webc/HPAwebFile/HPAweb\\_C/1247816547927](http://www.hpa.org.uk/webc/HPAwebFile/HPAweb_C/1247816547927).
2. Jain A, Ison CA. Chlamydia point-of-care testing: where are we now? *Sex Transm Infect* 2013 Mar;**89**(2):88-9.
3. CDC. Sexually transmitted diseases treatment guidelines 2010. 17/12/2010. Report No.: 59  
<http://www.cdc.gov/std/treatment/2010/STD-Treatment-2010-RR5912.pdf>.
4. Medical Foundation for AIDS & Sexual Health & British Association for Sexual Health and HIV. Standards for the Management of Sexually Transmitted Infections (STI) 2010. 1/1/2010.  
<http://www.bashh.org/documents/MF%20BASSH%20standards%2018Jan%20for%20the%20website.pdf>.
5. National Chlamydia Screening Programme. National Chlamydia Screening Programme Scorecard - NCSP data based on data as of 25.05.12 for the period 1st April 2011 - 31st March 2012. GUM data are for the period of Jan - December 2011. 2012. [http://www.chlamydia-screening.nhs.uk/ps/resources/data-tables/NCSP\\_Scorecard\\_Q1-4\\_2011\\_12.pdf](http://www.chlamydia-screening.nhs.uk/ps/resources/data-tables/NCSP_Scorecard_Q1-4_2011_12.pdf).
6. Turner KM, Round J, Horner P, et al. An early evaluation of clinical and economic costs and benefits of implementing point of care NAAT tests for Chlamydia trachomatis and Neisseria gonorrhoea in genitourinary medicine clinics in England. *Sex Transm Infect* 2013 Nov 22.
7. Watchirs Smith LA, Hillman R, Ward J, et al. Point-of-care tests for the diagnosis of *Neisseria gonorrhoeae* infection: a systematic review of operational and performance characteristics. *Sex Transm Infect* 2012 Oct 23;**89**(4):320-6.
8. Hsieh YH, Hogan MT, Barnes M, et al. Perceptions of an ideal point-of-care test for sexually transmitted infections--a qualitative study of focus group discussions with medical providers. *PLoS One* 2010;**5**(11):e14144.
9. Mahilum-Tapay L, Laitila V, Wawrzyniak JJ, et al. New point of care Chlamydia Rapid Test--bridging the gap between diagnosis and treatment: performance evaluation study. *BMJ* 2007 Dec 8;**335**(7631):1190-4.
10. Gaydos CA, van der Pol B, Jett-Goheen M, et al. Performance of the Cepheid CT/NG Xpert Rapid PCR Test for the Detection of *Chlamydia trachomatis* and *Neisseria gonorrhoeae*. *J Clin Microbiol* 2013 Mar 6.
11. Pathway Analytics. Sexual Health Tariff. <http://www.pathwayanalytics.com/sexual-health/about-the-tariff>  
Last accessed: 26/06/2014
12. Blackwell A, Thomas P, Wareham K, et al. Health gains from screening for infection of the lower genital tract in women attending for termination of pregnancy. *Lancet* 1993;**342**:206-10.

- 1
- 2
- 3 13. Grimes DA. Intrauterine device and upper-genital-tract infection. *Lancet* 2000 Sep 16;**356**(9234):1013-9.
- 4
- 5 14. Centers for Disease Control and Prevention (CDC). Antibiotic stewardship — the ultimate return on
- 6 investment. 5/11/2013. [http://www.cdc.gov/getsmart/healthcare/learn-from-others/factsheets/antibiotic-](http://www.cdc.gov/getsmart/healthcare/learn-from-others/factsheets/antibiotic-use.html)
- 7 [use.html](http://www.cdc.gov/getsmart/healthcare/learn-from-others/factsheets/antibiotic-use.html).
- 8
- 9
- 10 15. Department of Health. Antimicrobial stewardship: "Smart Smart - then focus". 18/11/2011.
- 11 [https://www.gov.uk/government/uploads/system/uploads/attachment\\_data/file/215308/dh\\_131181.pdf](https://www.gov.uk/government/uploads/system/uploads/attachment_data/file/215308/dh_131181.pdf).
- 12
- 13 16. Bignell CJ, FitzGerald M. UK national guideline for the management of gonorrhoea in adults, 2011. *Int J*
- 14 *STI AIDS* 2011;**22**:551-47.
- 15
- 16 17. Horner PJ, Boag FC. 2006 UK National Guideline for the Management of Genital Tract Infection with
- 17 *Chlamydia trachomatis*. British Association of Sexual Health & HIV; 2006.
- 18
- 19 18. Ison CA. Antimicrobial resistance in sexually transmitted infections in the developed world: implications
- 20 for rational treatment. *Current Opinion in Infectious Diseases* 2012 Feb;**25**(1):73-8.
- 21
- 22
- 23
- 24
- 25
- 26
- 27
- 28
- 29
- 30
- 31
- 32
- 33
- 34
- 35
- 36
- 37
- 38
- 39
- 40
- 41
- 42
- 43
- 44
- 45
- 46
- 47
- 48
- 49
- 50
- 51
- 52
- 53
- 54
- 55
- 56
- 57
- 58
- 59
- 60

**TITLE**

Research: Patient care pathways using chlamydia and gonorrhoea tests are evolving: point of care nucleic acid amplification tests may reduce genitourinary medicine service delivery costs.

**CORRESPONDING AUTHOR**

Elisabeth Adams, Aquarius Population Health Limited, Engine Shed, Station Approach, Temple Meads, Bristol  
BS1 6QH; tel +44 (0) ~~7976309695207 993 2930~~; [elisabeth.adams@aquariusph.com](mailto:elisabeth.adams@aquariusph.com)

**AUTHORS**

Elisabeth J Adams <sup>1,2</sup>, Alice Ehrlich <sup>1</sup>, Katherine ME Turner <sup>2</sup>, Kunj Shah <sup>1</sup>, John Macleod <sup>2</sup>,

Simon Goldenberg <sup>3</sup>, Robin K Meray <sup>1</sup>, Vikki Pearce <sup>4</sup>, Patrick Horner <sup>2,5</sup>

**AFFILIATIONS**

1 – Aquarius Population Health Limited, Bristol, UK

2 – School of Social and Community Medicine, University of Bristol, Bristol, UK

3 – Centre for Clinical Infection & Diagnostics Research, Guy's & St. Thomas' NHS Foundation Trust and King's College, London, UK

4 – V. Pearce Consulting Ltd, Hove, UK

5 – Department of Genitourinary Medicine, NHS Bristol, Bristol UK

**KEYWORDS**

Point of care technology, diagnostic test, gonorrhoea, chlamydia, costs and cost analysis

**WORD COUNT**

~~2827~~

2914



## ABSTRACT

### Objectives

We aimed to explore patient pathways using a chlamydia/gonorrhoea point of care (POC) nucleic acid amplification test (NAAT), and estimate and compare the costs of the proposed POC pathways with the current pathways using standard laboratory-based NAAT testing.

### Design/Participants

Workshops were conducted with health care professionals at four sexual health clinics representing diverse models of care in the UK. They mapped out current pathways that used chlamydia/gonorrhoea tests, and constructed new pathways using a POC NAAT. Healthcare professionals' time was assessed in each pathway.

### Outcome measure

The proposed POC pathways were then priced using a model built in Microsoft Excel, and compared to previously published costs for pathways using standard NAAT-based testing in an off-site laboratory.

### Results

Pathways using a POC NAAT for asymptomatic and symptomatic patients and chlamydia/gonorrhoea-only tests were shorter and less expensive than most of the current pathways. Notably, we estimate that POC testing as part of a sexual health screen for symptomatic patients, or as stand-alone chlamydia/gonorrhoea testing, could reduce costs per patient by as much as £16 or £6, respectively. In both cases, health care professionals' time would be reduced by approximately 10 minutes per patient.

### Conclusions

POC testing for chlamydia/gonorrhoea in a clinical setting may reduce costs and clinician time, and may lead to more appropriate and quicker care for patients. Further study is warranted on how to best implement POC testing in clinics, and on the broader clinical and cost implications of this technology.

## STRENGTHS AND LIMITATIONS OF THIS STUDY

- The main strength of this study is that it presents the first estimates of the costs of implementing chlamydia and gonorrhoea point of care testing compared to standard care (off-site laboratory processing of samples) in genitourinary medicine clinics, presenting a consensus from four clinics across England representing a range of service delivery models.
- The main limitation is that this is based on expert clinical opinion, rather than prospectively collected data, as point of care testing for chlamydia and gonorrhoea had not yet been implemented in England when this study was conducted.

## INTRODUCTION

*Chlamydia trachomatis* and *Neisseria gonorrhoea* are common sexually transmitted infections, and if untreated may cause pelvic inflammatory disease, which can result in serious reproductive sequelae such as tubal factor infertility and ectopic pregnancy.[1-3]

Typically, the nucleic acid amplification test result for chlamydia and gonorrhoea is available within a week from an off-site laboratory, but it can sometimes be over two weeks until the patient receives treatment, and some patients may not return for treatment.[4,5] If the results of these tests could be available at a single visit, outcomes could be improved by achieving earlier treatment and partner notification, minimising the risk of onward transmission and developing complications.[6-8] Such a service would also likely be more convenient for patients.[7-9]

This could be achieved with sensitive and specific NAAT point of care tests (POCTs), which have recently become available. One such test, Cepheid Xpert® CT/NG (Cepheid, Sunnyvale, CA, USA), has at least equivalent performance to traditional laboratory based NAATs, providing results within 90 minutes of specimen collection.[10]

We have developed a model that enables us to evaluate the components of care pathways and associated costs. In this report we review current patient pathways in sexual health clinics that include chlamydia and gonorrhoea testing and treatment, explore and map new pathways to incorporate chlamydia and gonorrhoea POC testing

efficiently in GUM (genitourinary medicine) clinics in the UK, estimate the costs of the new pathways, and compare the costs with the current pathways using standard laboratory-based NAATs.

## METHODS

Patient pathways using chlamydia/gonorrhoea POCTs were developed during workshops at four sexual health clinics, attended by three to fifteen staff members across all clinic staff grades. Pathways were based on expert opinion given to us during the workshops, rather than any actual patient flow data. To increase applicability of the pathways across different service types, we chose a range of clinics with diverse services and service delivery. Urban and rural clinics (two in the South West of England and two in London), those providing either GUM or integrated sexual health services, and those serving higher-risk populations were represented. Based on staff input, patient pathways were constructed to model the consecutive clinical steps involved in testing and treatment, both for POC pathways and also current service delivery (standard care).

A model was built in Microsoft Excel to replicate pathway steps and estimate costs. We assumed the perspective of the National Health Service (NHS), and only clinical costs were included (£UK2012); patient time and associated costs were excluded. The staff cost per minute included indirect and overhead costs. Standard off-site laboratory-based chlamydia/gonorrhoea testing costs and all other cost inputs were taken from previously published sources using an identical modelling approach,[11] to allow for direct comparison between current standard pathways and proposed POC pathways (Table A in the Supplementary material online: [File 1](#)). POCT costs were based on use of the only currently commercially available chlamydia/gonorrhoea POCT, the Cepheid Xpert® CT/NG system, with a baseline assumed cost of £18, which includes the cartridge, machine rental, service, and maintenance, assuming 15,000 tests are done annually (i.e., 60 tests/day, Monday-Friday, an estimated number of tests for an average genitourinary medicine clinic in England), plus an additional £1.71 for the Cepheid sample collection materials (data from Cepheid). We varied the POCT cost from £13/test (assuming 20,000 tests or more annually, i.e. large clinic) to £25 (assuming one test/day, very small clinic). These costs exclude staff training (likely to be 30 minutes per person). This compares to an assumed baseline cost of £12 for the standard test plus £1.35 for the sample collection materials. We assumed that the standard test cost included all aspects of test processing including any transportation costs.

The outputs of the model were the costs of each testing pathway as a primary pathway (delivered on its own) and as an additional pathway (delivered in conjunction with other clinical services). To estimate the cost of

1  
2  
3 additional pathways, staff time was weighted by the proportion of additional time, but all non-staff inputs are  
4  
5 included at full value.

6  
7 The total pathway cost = (Cost Step 1) + (Cost Step 2) + ... + (Cost Step N).

8  
9 Detailed descriptions of patient pathway development and cost modelling are available as Supplementary  
10  
11 [methods materials](#) online: [File 1](#).

## 12 13 14 **RESULTS**

15  
16 Patient testing pathways consist of a set of standard steps: patient registration, consultation, clinical  
17  
18 examination, sample collection (blood, urine, and/or vaginal swab), health promotion counselling, off-site  
19  
20 laboratory-based sample processing, on-site POC testing, microscopic analysis of specimens in the clinic, results  
21  
22 counselling, results management (data entry and notifying patients of results), and contacting patients who test  
23  
24 positive to ensure follow-up treatment. Detailed descriptions of each step are available in Table B in the  
25  
26 Supplementary material online. The standard and POC pathways differ in which steps are used, time for each,  
27  
28 and order of steps. Chlamydia and gonorrhoea testing may be carried out as either stand-alone testing or as part  
29  
30 of a full sexual health screen including additional testing for syphilis and HIV. The sexual health screen for  
31  
32 asymptomatic versus symptomatic patients differs in that the latter includes a clinical examination, culture for  
33  
34 gonorrhoea, and microscopy. The steps of these pathways are shown, along with costs and clinician time, in  
35  
36 [Figure Table 1A](#). There are two proposed sexual health screen pathways using POC testing, given as POC1 and  
37  
38 POC2. [Details of all resources used are given in the online Supplementary materials online: File 2](#).

39  
40 [\[Insert Figure 1\]](#)  
41  
42  
43  
44  
45  
46  
47  
48  
49  
50  
51  
52  
53  
54  
55  
56  
57  
58  
59  
60

**Table 1: Comparison of current and proposed POC clinical pathways for chlamydia and gonorrhoea testing and treatment**

| Pathway                                               | Clinical Steps                                                                                                                                                                                                                           | As Primary Pathway |            | As Additional Pathway |            |
|-------------------------------------------------------|------------------------------------------------------------------------------------------------------------------------------------------------------------------------------------------------------------------------------------------|--------------------|------------|-----------------------|------------|
|                                                       |                                                                                                                                                                                                                                          | Cost per patient   | Time (min) | Cost per patient      | Time (min) |
| <b>A) Testing Pathways</b>                            |                                                                                                                                                                                                                                          |                    |            |                       |            |
| <b>Chlamydia and gonorrhoea only</b>                  |                                                                                                                                                                                                                                          |                    |            |                       |            |
| Current                                               | Consultation → Sample collection* → Health promotion → Off-site sample processing (1-2 weeks) → Results management → Contact positives                                                                                                   | £45.34             | 32.8       | £28.65                | 15.7       |
| POC                                                   | Consultation → Sample collection* → POCT (90 minutes) → Results management → Contact positives                                                                                                                                           | £38.76             | 21.8       | £32.59                | 13.4       |
| <b>Sexual health screen for asymptomatic patients</b> |                                                                                                                                                                                                                                          |                    |            |                       |            |
| Current                                               | Consultation → Sample collection* <sup>†</sup> → Health promotion → Off-site sample processing (1-2 weeks) → Results management → Contact positives                                                                                      | £79.77             | 37.2       | £54.86                | 12.3       |
| POC1                                                  | Consultation → Sample collection* <sup>†</sup> → POCT (90 minutes) → Results management (POCT) → Off-site sample processing (1-2 weeks) → Results management (HIV, syphilis) → Contact positives                                         | £77.42             | 31.2       | £69.43                | 21.1       |
| POC2                                                  | Sample collection* <sup>†</sup> → POCT (90 minutes) → Consultation/Results (POCT) → Sample collection <sup>†</sup> → Off-site sample processing (1-2 weeks) → Results management (HIV, syphilis) → Contact positives                     | £73.57             | 26.2       | £65.57                | 16.1       |
| <b>Sexual health screen for symptomatic patients</b>  |                                                                                                                                                                                                                                          |                    |            |                       |            |
| Current                                               | Consultation → Exam/Sample collection* <sup>†</sup> → Microscopy → Health promotion → Off-site sample processing (1-2 weeks) → Results management → Contact positives                                                                    | £99.38             | 47.2       | £73.82                | 22.3       |
| POC1                                                  | Consultation → Exam/Sample collection* <sup>†</sup> → POCT (90 minutes) → Microscopy → Health promotion → Results management (POCT) → Off-site sample processing (1-2 weeks) → Results management (HIV, syphilis) → Contact positives    | £100.39            | 52.2       | £74.98                | 27.3       |
| POC2                                                  | Sample collection* <sup>†</sup> → POCT (90 minutes) → Consultation/Results (POCT) → Exam / Sample collection <sup>†</sup> → Microscopy → Off-site sample processing (1-2 weeks) → Results management (HIV, syphilis) → Contact positives | £84.46             | 36.2       | £70.72                | 21.1       |
| <b>B) Treatment Pathways</b>                          |                                                                                                                                                                                                                                          |                    |            |                       |            |
| Chlamydia                                             | Results → Treatment → Partner notification → Supported partner notification                                                                                                                                                              | £34.89             | 23.5       | £24.99                | 13.5       |
| Gonorrhoea 1 <sup>st</sup> visit                      | Exam / Sample collection* (for NG culture) → Treatment → Health promotion / Partner notification → Off-site sample processing → Supported partner notification                                                                           | £72.07             | 51.0       | £61.88                | 38.0       |
| Gonorrhoea 2 <sup>nd</sup> visit TOC Current          | Sample collection* (for NG culture and NAAT) → Off-site sample processing (1-2 weeks) → Results management                                                                                                                               | £39.98             | 20         | £32.89                | 10         |
| Gonorrhoea 2 <sup>nd</sup> visit TOC POC              | Sample collection* (for NG culture and POCT) → POCT (90 min) → Off-site sample processing (for NG culture, 2-4 days) → Results management                                                                                                | £45.87             | 20         | £38.77                | 10         |

**Table 1. Comparison of current and proposed POC clinical pathways for chlamydia and gonorrhoea testing and treatment.** The clinical pathway steps for chlamydia and gonorrhoea (A) testing and (B) treatment are shown along with cost per patient and minutes of health care professionals' time for each pathway when delivered as either a primary or an additional pathway. The first step, patient registration, is common to all pathways and is not shown. Alternative POC pathways proposed by different clinics are reported as POC1 and POC2. The cost of POC pathways may vary by -£5/+£7 based on volume of tests performed. NG, *Neisseria gonorrhoea*. TOC, test of cure performed four weeks after initial treatment for gonorrhoea. \*Urine/vulvo-vaginal swab collected for chlamydia and gonorrhoea testing. <sup>†</sup>Blood sample collected for HIV and syphilis testing. <sup>‡</sup>Patients would drop off sample and book an appointment later in the day for their consultation and results.

1  
2  
3  
4  
5  
6 The lengthiest and most costly pathway for chlamydia/gonorrhoea testing is the sexual health screen for  
7 symptomatic patients. A proposed POC pathway could reduce this cost from £99 to £92 per patient (averaging  
8 POC1 and POC2), and reduce health care professional time from 47 to 44 minutes per patient as a primary  
9 pathway. There was a difference in the two proposed POC pathways for symptomatic patients; namely, POC1  
10 includes a slightly longer consultation for patients (15 minutes versus 10 minutes) and an additional step for  
11 health promotion with a Health Adviser for 6 minutes. A portion of the cost savings arises from eliminating the  
12 need for gonorrhoea culture in symptomatic patients, except for those testing positive by POCT. Reductions in  
13 cost and time with POC testing are also expected for stand-alone chlamydia/gonorrhoea testing and for  
14 asymptomatic sexual health screen pathways, when delivered as primary pathways.  
15  
16  
17  
18  
19  
20  
21  
22

23 In some clinics, asymptomatic patients may be offered a rapid sexual health screen, which utilises laboratory-  
24 based chlamydia/gonorrhoea testing but reduces costs and clinician time by combining certain steps. The rapid  
25 sexual health screen is the most cost- and time-efficient sexual health screen pathway (Table C in the  
26 Supplementary material online: [File 1](#)) but may not be appropriate for all patients. In addition, stand-alone  
27 chlamydia/gonorrhoea self-service testing is offered in some clinics, but only to asymptomatic patients;  
28 however, incorporating a POCT into this pathway would increase costs compared to standard care (Table C in  
29 the Supplementary material online: [File 1](#)).  
30  
31  
32  
33  
34  
35  
36

37 ~~Figure Table~~ 1B outlines the clinical steps and costs of treating patients for chlamydia or gonorrhoea. Pathway  
38 steps specific to treatment include: gonorrhoea culture for confirmation and antimicrobial sensitivity testing,  
39 treatment with antibiotics, counselling and, if requested, support/assistance with partner notification. A benefit  
40 of POC testing is that patients can initiate treatment during the same visit at which they receive positive  
41 diagnosis, eliminating the need for a follow-up treatment visit, resulting in lower overall cost. For example,  
42 under current practice, it would cost £114.66 to screen and treat a chlamydia positive patient having an  
43 asymptomatic screen (primary screen, £79.77; primary treatment at second attendance, £34.89). This could be  
44 reduced to £100.49 with a POCT, as the patient would be treated as part of the same attendance (primary screen,  
45 £75.50 [average of POC1 and POC2]; additional treatment, £24.99).  
46  
47  
48  
49  
50  
51  
52

53 Furthermore, under current practice, some symptomatic patients and partners of positive patients are treated  
54 empirically at their testing visit before laboratory-confirmed results are available. Symptomatic patients treated  
55 presumptively for chlamydia or gonorrhoea infection incur costs of £124.37 and £201.24 per patient,  
56  
57  
58  
59  
60

1  
2  
3 respectively (primary symptomatic sexual health screen, £99.38; plus additional chlamydia treatment, £24.99; or  
4 gonorrhoea treatment including a four-week follow up test of cure, £101.86). If a POCT were used on these  
5 symptomatic patients, the cost of the testing and treatment pathways (averaging POC1 and POC2) would be less  
6 than standard care (chlamydia, £117.42; gonorrhoea, £200.18), and the number of patients treated  
7 inappropriately would be reduced. This could enable more appropriate treatment if a non-specific genital tract  
8 infection is suspected, or potentially no treatment at all which would reduce costs by £24.99 for chlamydia and  
9 £101.86 for gonorrhoea.

## 16 DISCUSSION

19 Our results indicate that the total cost of most chlamydia/gonorrhoea testing pathways in GUM clinics would be  
20 similar or reduced by using POC testing in place of off-site laboratory-based testing, and staff time would be  
21 reduced. In addition to these benefits, POC technologies have the potential to significantly improve sexual  
22 health care, enabling for the first time, accurate chlamydia and gonorrhoea specific diagnoses to be made and  
23 appropriately treated in a single visit. This may reduce the number of onward transmissions, inappropriate  
24 treatments in patients who are chlamydia or gonorrhoea negative but treated presumptively, and prevent pelvic  
25 inflammatory disease in women.[6] Interestingly, many of the proposed POC pathways could inform redesign of  
26 standard pathways without swapping to a POCT. This highlighted that many clinics could improve efficiency in  
27 service delivery even before implementing a POCT.

28 By reducing loss to follow-up, chlamydia/gonorrhoea POC testing could be particularly useful with groups who  
29 are less likely to return for treatment,[2,5,7] including high-risk groups, such as men who have sex with men,  
30 and commercial sex workers. Patients who do not return, or are lost to follow-up, may comprise up to 10% of  
31 all chlamydia diagnoses,[5] although this may be less in GUM clinics. Chlamydia/gonorrhoea POC pathways  
32 could also be implemented in non-GUM settings, such as termination of pregnancy or contraception clinics.  
33 Women infected with chlamydia or gonorrhoea are at increased risk of developing pelvic inflammatory disease  
34 following insertion of an intra-uterine device or termination of pregnancy,[12,13] and would benefit from a  
35 rapid diagnosis.[6] With POCTs, novel ways of testing are imaginable, e.g. POCTs could be used in outreach,  
36 with the platform situated in a mobile sexual health testing unit that travels to particular groups such as  
37 commercial sex workers.

38 However, as with any new technology, potential benefits must be weighed with concerns, such as how to best  
39 manage the 90 minute delay before results are available, although this may be more of an issue for clinicians  
40  
41  
42  
43  
44  
45  
46  
47  
48  
49  
50  
51  
52  
53  
54  
55  
56  
57  
58  
59  
60

1  
2  
3 than patients.[8,9] Due to variation in the way that GUM services are configured and delivered across England,  
4 the best way to implement a POC pathway may depend on the specific clinic, based on factors including size of  
5 the clinic, location (e.g. rural vs. urban), patient mix, staff mix, etc. For example, ~~in urban clinics~~, patients could  
6 attend in the morning to register, provide a self-collected sample, and book a slot for later in the day to see a  
7 clinician for a consultation, blood tests, results and treatment if needed. This system of having patients drop off  
8 a sample at the beginning of the day and book in to be seen later may be attractive to patients in an urban  
9 setting, where they could either go back to work/school before their appointment, or spend time in the city  
10 centre. Clinics that currently offer a slot system such as this would easily transition to this type of system using  
11 a point of care test, and patients' treatment could be started on the same day of testing. This system may not  
12 work in practice, however, as patients might give a sample but would not return later.

13  
14 In many rural areas it is not feasible to make two visits on the same day to the clinic since patients may have a  
15 long journey to the GUM clinic. As many clinics experience long waits to be examined and tested, it is possible  
16 that patients would be willing to wait in clinic until the results are back, so as to be treated at the same visit.  
17 Alternatively, patients could register, have a brief consultation with a clinician, have blood samples taken, and  
18 lastly provide a self-collected urine or vaginal swab sample before leaving the clinic. The clinic would later  
19 notify patients of their results with positive patients returning later in the day or the next day. While it would not  
20 offer an instantaneous result, there could still be significant benefits to patients if they were treated the next day  
21 rather than waiting 1-2 weeks as under standard care. Additional benefits and concerns of POC pathways are  
22 presented in Table D in the Supplementary material online: [File 1](#).

23  
24 We anticipate that POC testing may also reduce costs associated with testing and treating partners of  
25 chlamydia/gonorrhoea positive patients and improve antimicrobial stewardship, an international priority.[14,15]  
26 Standard practice is to offer chlamydia and gonorrhoea treatment presumptively to partners of positive patients  
27 (epidemiological treatment) when they attend for screening.[16,17] As the routine NAAT result is not available  
28 at the time of testing it cannot be used to inform the decision of whether treatment is actually indicated and  
29 contacts will be treated unnecessarily. Currently the results of testing, at the time of epidemiological treatment  
30 of partners, are used for surveillance purposes and if positive, additional partner notification when indicated. If  
31 87.9% and 85.7% of partners of chlamydia and gonorrhoea-positive patients are tested for chlamydia/  
32 gonorrhoea at the same time they receive treatment [1] and 36.8% and 33.2% of the partners are positive,  
33 respectively, we estimate that using a POC NAAT on partners before treatment would save £19 and £62 for  
34  
35  
36  
37  
38  
39  
40  
41  
42  
43  
44  
45  
46  
47  
48  
49  
50  
51  
52  
53  
54  
55  
56  
57  
58  
59  
60



1  
2  
3 partners of chlamydia and gonorrhoea-positive individuals, compared to standard care. For gonorrhoea, we  
4 estimate there would be a cost savings if the positivity is less than 93% in partners and 50% undergo  
5 chlamydia/gonorrhoea testing, as the gonorrhoea management pathway is expensive compared to testing. Hence,  
6 efficiency savings may be gained if the prevalence in partners is low, but it would be more costly to use a POC  
7 NAAT on partners first before treatment if a high proportion of partners are positive. However, both scenarios  
8 would reduce overtreatment and therefore improve antimicrobial stewardship in genitourinary  
9

10  
11  
12  
13  
14 medicine.[14,15,18] Caution may be warranted however, to ensure that potential positive partners are not  
15  
16 missed if they fall outside of the window period for detecting infection.

17  
18 The main limitation of the study, is that pathways are based on expert clinical opinion, rather than prospectively  
19 collected data. This is because at the time the workshops were conducted, point of care testing for chlamydia  
20 and gonorrhoea had not yet been implemented in England. Therefore, it was not possible to validate if the  
21 pathways generated in the workshops were indicative of what happens in actual practice. Our study proposes  
22 several novel chlamydia/gonorrhoea testing pathways using POC technologies which may reduce costs and  
23 health care professionals' time in GUM clinics. Although our study is based on use of the only currently  
24 commercially available chlamydia/gonorrhoea POCT, the Cepheid Xpert CT/NG system, we anticipate that  
25 results would be applicable to other tests with similar performance characteristics. If other tests become  
26 available, their pathway costs could be estimated and compared using the same model. However, these  
27 pathways may not be relevant for POCTs that have lower performance such as some of the previous generation  
28 tests. This is a modelling study based on theoretical pathways and we did not aim to test that the pathways  
29 would work in practice or validate the steps. Once these tests are in clinics, rigorous evaluation is required in  
30 order to ensure that they are delivering the promised benefits at no additional overall cost.  
31  
32  
33  
34  
35  
36  
37  
38  
39  
40  
41  
42  
43  
44  
45  
46  
47  
48

49 **FIGURE 1 TITLE**

50  
51 **Comparison of current and proposed POC clinical pathways for chlamydia and gonorrhoea testing and**  
52 **treatment.**  
53

54  
55  
56 **FIGURE 1 LEGEND**  
57  
58  
59  
60

~~The clinical pathway steps for chlamydia and gonorrhoea (A) testing and (B) treatment are shown along with cost per patient and minutes of health care professionals' time for each pathway when delivered as either a primary or an additional pathway. The first step, patient registration, is common to all pathways and is not shown. Alternative POC pathways proposed by different clinics are reported as POC1 and POC2. The cost of POC pathways may vary by £5/£7 based on volume of tests performed. NG, *Neisseria gonorrhoea*; TOC, test of cure performed four weeks after initial treatment for gonorrhoea. \*Urine/vulvo-vaginal swab collected for chlamydia and gonorrhoea testing. †Blood sample collected for HIV and syphilis testing. ‡Patients would drop off sample and book an appointment later in the day for their consultation and results.~~

#### ACKNOWLEDGEMENTS

Thank you to the clinic leads for organising workshops and all of the staff for their participation: Bristol Sexual Health Clinic, Andrew de Burgh-Thomas and Indrajith Karunaratne – Hope House (Gloucester GUM clinic), Simon Barton and Nneka Nwokolo – 56 Dean Street (Chelsea & Westminster NHS Trust, London), Michael Brady – Camberwell Sexual Health Clinic (Kings College Hospital). Thanks to Pathway Analytics for providing the input data from their model, and finally thanks to Alisha Davies, Jeff Round and Arminder Deol for useful comments on the study and the manuscript.

#### CONTRIBUTOR STATEMENT

PH and EA conceived the study idea, EA conducted the workshops, supervised the project, planned the pathway model, analysed and interpreted the model results and drafted the manuscript. PH provided clinical input on the pathways, interpreted model results, and helped draft the manuscript. KS built the pathway model in Excel. AE helped draft the manuscript and provided study support. PH and JM provided expert opinion on the parameter choices and guidance on the structure of the model. SG provided expert knowledge regarding the use of point of care tests from a microbiological context. RM helped draft the manuscript. VP provided expert advice about the sexual health pathways and commissioning/funding. EA, PH, JM and SG contributed to the study design. All authors critically reviewed the paper for content and approved the final submitted version.

**COMPETING INTERESTS**

EA has received funding from Atlas Genetics, Astra Zeneca, Bristol University, Cepheid, Gilead, Hologic the Office for Sexual Health, Pathway Analytics and St Georges University and for sexual health consultancy and lectures; PH has received funding from HEFC, BASHH, the Bristol University, Imperial College London, the CPS and Hologic for consultancy, lectures, patents, and providing evidence; KT has received funding from for NIHR for a personal fellowship, and from NHS Bristol Hospitals Health Trust, the Office for Sexual Health and NICE for consultancy. SG has received funding from Cepheid for travel and accommodation for work not related to this submission. EA, SG, RM, VP, Bristol University (PH & JM), AE and KS received funding from Aquarius Population Health for this work. No other conflicts of interest.

Authors are independent for the purposes of publication and Cepheid did not have any role in the writing of this paper or veto over any results published. Cepheid provided funding to Aquarius Population Health to conduct the study and estimates of the cost of their proprietary Point of Care Test. Other similar tests are, or are soon to be commercially available. The results presented could be applicable to any other point of care test with similar performance, cost and usability. We do not make any recommendation as to which test, if any, a clinic should use.

**FUNDING**

Cepheid funded Aquarius Population Health to conduct the study.

## REFERENCES

1. Public Health England. STI Data Tables. 2012.  
[http://www.hpa.org.uk/webc/HPAwebFile/HPAweb\\_C/1247816547927](http://www.hpa.org.uk/webc/HPAwebFile/HPAweb_C/1247816547927).
2. Jain A, Ison CA. Chlamydia point-of-care testing: where are we now? *Sex Transm Infect* 2013 Mar;**89**(2):88-9.
3. CDC. Sexually transmitted diseases treatment guidelines 2010. 17/12/2010. Report No.: 59  
<http://www.cdc.gov/std/treatment/2010/STD-Treatment-2010-RR5912.pdf>.
4. Medical Foundation for AIDS & Sexual Health & British Association for Sexual Health and HIV. Standards for the Management of Sexually Transmitted Infections (STI) 2010. 1/1/2010.  
<http://www.bashh.org/documents/MF%20BASSH%20standards%2018Jan%20for%20the%20website.pdf>.
5. National Chlamydia Screening Programme. National Chlamydia Screening Programme Scorecard - NCSP data based on data as of 25.05.12 for the period 1st April 2011 - 31st March 2012. GUM data are for the period of Jan - December 2011. 2012. [http://www.chlamydia-screening.nhs.uk/ps/resources/data-tables/NCSP\\_Scorecard\\_Q1-4\\_2011\\_12.pdf](http://www.chlamydia-screening.nhs.uk/ps/resources/data-tables/NCSP_Scorecard_Q1-4_2011_12.pdf).
6. Turner KM, Round J, Horner P, et al. An early evaluation of clinical and economic costs and benefits of implementing point of care NAAT tests for Chlamydia trachomatis and Neisseria gonorrhoea in genitourinary medicine clinics in England. *Sex Transm Infect* 2013 Nov 22.
7. Watchirs Smith LA, Hillman R, Ward J, et al. Point-of-care tests for the diagnosis of *Neisseria gonorrhoeae* infection: a systematic review of operational and performance characteristics. *Sex Transm Infect* 2012 Oct 23;**89**(4):320-6.
8. Hsieh YH, Hogan MT, Barnes M, et al. Perceptions of an ideal point-of-care test for sexually transmitted infections--a qualitative study of focus group discussions with medical providers. *PLoS One* 2010;**5**(11):e14144.
9. Mahilum-Tapay L, Laitila V, Wawrzyniak JJ, et al. New point of care Chlamydia Rapid Test--bridging the gap between diagnosis and treatment: performance evaluation study. *BMJ* 2007 Dec 8;**335**(7631):1190-4.
10. Gaydos CA, van der Pol B, Jett-Goheen M, et al. Performance of the Cepheid CT/NG Xpert Rapid PCR Test for the Detection of *Chlamydia trachomatis* and *Neisseria gonorrhoeae*. *J Clin Microbiol* 2013 Mar 6.
11. Pathway Analytics. Sexual Health Tariff. <http://www.pathwayanalytics.com/cms/sh-tariff> Last accessed: 21/1/2013  
<http://www.pathwayanalytics.com/sexual-health/about-the-tariff> Last accessed: 26/06/2014
12. Blackwell A, Thomas P, Wareham K, et al. Health gains from screening for infection of the lower genital tract in women attending for termination of pregnancy. *Lancet* 1993;**342**:206-10.

13. Grimes DA. Intrauterine device and upper-genital-tract infection. *Lancet* 2000 Sep 16;**356**(9234):1013-9.
14. Centers for Disease Control and Prevention (CDC). Antibiotic stewardship — the ultimate return on investment. 5/11/2013. <http://www.cdc.gov/getsmart/healthcare/learn-from-others/factsheets/antibiotic-use.html>.
15. Department of Health. Antimicrobial stewardship: "Smart Smart - then focus". 18/11/2011. [https://www.gov.uk/government/uploads/system/uploads/attachment\\_data/file/215308/dh\\_131181.pdf](https://www.gov.uk/government/uploads/system/uploads/attachment_data/file/215308/dh_131181.pdf).
16. Bignell CJ, FitzGerald M. UK national guideline for the management of gonorrhoea in adults, 2011. *Int J STI AIDS* 2011;**22**:551-47.
17. Horner PJ, Boag FC. 2006 UK National Guideline for the Management of Genital Tract Infection with *Chlamydia trachomatis*. British Association of Sexual Health & HIV; 2006.
18. Ison CA. Antimicrobial resistance in sexually transmitted infections in the developed world: implications for rational treatment. *Current Opinion in Infectious Diseases* 2012 Feb;**25**(1):73-8.

1  
2 **ONLINE SUPPLEMENTARY MATERIALS: FILE 1**  
3

4 **Clinical care pathways using chlamydia and gonorrhoea tests are evolving: point of care nucleic acid**  
5 **amplification tests may reduce genitourinary medicine service delivery costs**  
6  
7  
8  
9

10  
11 **I. Supplementary Methods**

12 A. Clinical pathways and steps

13 B. Building chlamydia and gonorrhoea clinical pathways

14 C. Cost model  
15  
16  
17  
18

19 **II. Table A: Cost inputs used in the model**

20  
21 **III. Table B: Pathway step descriptions**

22  
23 **IV. Table C: Additional chlamydia and gonorrhoea testing and treatment pathways**

24  
25 **V. Table D: Potential benefits/concerns of POCT**

26  
27 **VI. References**  
28  
29  
30  
31  
32  
33  
34  
35  
36  
37  
38  
39  
40  
41  
42  
43  
44  
45  
46  
47  
48  
49  
50  
51  
52  
53  
54  
55  
56  
57  
58  
59  
60

## Supplementary Methods

### A) Clinical pathways and steps

Each of the pathways comprises a number of steps; each step has a number of elements which have costs associated with them or are used to scale the costs (e.g. the proportion of patients who go through that step).

These elements are:

Step components:

- Proportion of patients who go through the step (activity)
- Length of time (minutes) to complete the step
- Grade of staff/staff blend
- Non-staff resources required: consumables, drugs and pathology
- Proportion of the time, if the step is delivered in conjunction with another pathway

For most steps in the pathway a blend of staff is likely to be involved, for example, any grade of nurse. These were explicitly modelled and such combinations were taken from the Integrated London Sexual Health Tariff [1,2].

If two pathways are delivered at the same time, one would be considered as the primary pathway and the other as an additional pathway, in terms of costing. Efficiencies with staff time are generated when more than one pathway is delivered during a consultation, but the full amount of non-staff inputs are still needed as these are specific to the pathway being delivered. For example, the initial registration or health promotion steps would not occur twice, but any non-staff consumables would be required at 100%.

### B) GUM Clinic Workshops

We chose a variety of clinics for the workshops to obtain as wide a range of opinions as possible given a small sample size. These included a traditional GUM clinic, a fully integrated sexual health clinic with STI and contraception offered, and one with a large proportion of individuals from high-risk groups. A lead clinician at each clinic was asked to invite his or her coworkers, and to encourage a wide range of participation. These workshops were organized during allocated staff training sessions so as not to interfere with normal working hours. Staff were all made aware of the purpose of the workshop, that detailed notes would be taken on what was said during the workshops, and that the information would be used to build consensus pathways and cost them out. All staff were made aware that the goal was to present our findings as a peer reviewed publication; consent

was implicitly given by attendance. Workshops were attended by a range of clinical and administrative staff including, at a minimum, one consultant, one nurse (Band 7/8), one health advisor, and one administrator. Each workshop lasted between 60-90 minutes.

### C) Building chlamydia and gonorrhoea clinical pathways

The pathways were created using an iterative methodology. First, the research team reviewed the current pathways from the published Integrated London Sexual Health Tariff [1] and proposed new patient pathways using a chlamydia/gonorrhoea POCT to prompt discussions at the first workshop. During each workshop we asked open-ended questions about the clinic's current care pathways and possible modifications if a chlamydia/gonorrhoea POC NAAT were available. Questions considered patient flow, time from test to treatment, and the total number of clinical steps or time which would be reduced by using POC NAAT. We also captured the benefits and limitations of using and implementing a chlamydia/gonorrhoea POC NAAT in clinical practice. Subsequent workshops built on the pathways generated at previous workshops, refining them or creating new ones if their care delivery varied significantly. Costs were not considered during the workshops. We returned all of the pathways to the study team and workshop participants at the end of the study, asking for any final comments and to obtain consensus around the pathway detail.

### C) Cost model

The total pathway cost = (Cost Step 1) + (Cost Step 2) + ... + (Cost Step N).

$$\text{Cost Step } N_{\text{Primary}} = A \times \left( M \times ((C_{s1} \times Q_{s1}) + (C_{s2} \times Q_{s2}) + \dots + (C_{sN} \times Q_{sN})) + \sum C_{\text{Cons}} \times Q + \sum \right)$$

If the proportion additional is 0, then Cost Step  $N_{\text{Additional}} = 0$ , else

$$\text{Cost Step } N_{\text{Additional}} = A \times \left( \text{Add} \times M \times ((C_{s1} \times Q_{s1}) + (C_{s2} \times Q_{s2}) + \dots + (C_{sN} \times Q_{sN})) + \sum C_{\text{Cons}} \times Q \right)$$

Where A is the activity, M is the number of minutes, C is the cost, Q is the quantity/proportion,  $s_1, s_2 \dots s_N$  are the different staff grades/blends, Cons is consumables, Path is pathology and Add is the proportion additional.



1  
2 We made some general assumptions about the pathways when information was not available from the focus  
3 groups. This was done to ensure some consistency in the pathways. There were:  
4

- 5 • Patient registration step – 5 minutes, 100% admin clerical, 0% as an additional pathway. The cost of  
6 patient registration is included in the total pathway cost, but is not shown in Figure 1 for simplicity.
- 7 • Both standard care and POCT testing pathways require sample collection instructions, gloves, urine pot  
8 and vulvo-vaginal swab.
- 9 • For asymptomatic patients, 70% would be a urine sample and 30% would be a vulvo-vaginal swab. This  
10 is based on 100% of men providing urine, and 60% of women providing a urine sample.
- 11 • The health promotion step always includes the consumables: KY lubricant (x2), STI literature (x3), male  
12 condoms (x10). Where no health promotion step is included, we added the same consumables to the  
13 consultation.
- 14 • For standard care pathways, the results management step is done by a 5/6 Nurse (6 minutes), 95% SMS  
15 text message, 2% letter notification, 3% telephone notification.
- 16 • For POCT pathways, the results management step is done by a 5/6 Nurse (6 minutes), with all patients  
17 receiving results by SMS text message, and of those 2% and 3% also receive results by letter or telephone  
18 notification, respectively.
- 19 • For standard care and POCT pathways, the step for contacting those with a positive or equivocal test  
20 results requires 90% SMS text message, 5% letter notification, 5% telephone notification.
- 21 • Microscopy is done for all symptomatic patients and is 10 minutes of a 5/6 Nurse, using blotting paper,  
22 gloves, gram stain, immersion oil, loops and a slide.
- 23 • Blood tests all include bandages/plaster, blood tube, cotton wool, gloves, needle, sterets/antiseptic wipe,  
24 syringe, transport tube and vacutainer.
- 25 • The proportion additional time was taken from pathways in the Integrated London Sexual Health Tariff  
26 [1] as this was not specifically discussed in the focus groups.  
27  
28  
29  
30  
31  
32  
33  
34  
35  
36  
37  
38  
39  
40  
41  
42  
43  
44  
45  
46  
47  
48  
49  
50  
51  
52  
53  
54  
55  
56  
57  
58  
59  
60

**Table A: Cost inputs used in the model; taken from the Integrated Sexual Health Tariff [1,2]**

| Type        | Item                                             | Cost  | Unit        |
|-------------|--------------------------------------------------|-------|-------------|
| Staff       | Blend Doctor - N7/8                              | 1.45  | Minute      |
| Staff       | Blend Nurse 7/8                                  | 1.10  | Minute      |
| Staff       | Blend all com SRH N2 - Dr                        | 1.06  | Minute      |
| Staff       | Blend Health Adviser                             | 1.03  | Minute      |
| Staff       | Blend Nurse 5/6/7/8                              | 0.89  | Minute      |
| Staff       | Blend Nurse 5/6                                  | 0.75  | Minute      |
| Staff       | Admin/clerical                                   | 0.53  | Minute      |
| Pathology   | Cepheid PoC CT/GC Test                           | 18.00 | Sample      |
| Pathology   | Chlamydia & Gonorrhoea NAAT                      | 12.51 | Sample      |
| Pathology   | GC Culture/typing - lab processing               | 7.55  | Sample      |
| Pathology   | GC NAAT                                          | 12.00 | Sample      |
| Pathology   | Gonorrhoea Culture                               | 4.54  | Sample      |
| Pathology   | HIV Serology                                     | 52.80 | Sample      |
| Pathology   | HIV Serum test (4th Generation)                  | 12.78 | Sample      |
| Pathology   | Syphilis Immunoassy - Total antibody (IgG & IgM) | 16.50 | Sample      |
| Consumables | Bandages/ plasters                               | 0.07  | Item        |
| Consumables | Blood tube                                       | 0.12  | Item        |
| Consumables | Blotting paper                                   | 0.05  | Item        |
| Consumables | Chlamydia - Local Leaflet                        | 0.06  | Item        |
| Consumables | Chlamydia - National Leaflet                     | 0.06  | Item        |
| Consumables | Cotton Wool                                      | 0.01  | Item        |
| Consumables | Cover Slip                                       | 0.65  | Item        |
| Consumables | CT/GC Swab (cervical/endocervical)               | 1.56  | Item        |
| Consumables | Culture plate                                    | 1.04  | Item        |
| Consumables | Culture swab- GC                                 | 1.04  | Item        |
| Consumables | Dark ground microscopy kit                       | 0.21  | Use         |
| Consumables | Gloves                                           | 0.05  | Pair        |
| Consumables | Gonorrhoea Leaflet                               | 0.06  | Item        |
| Consumables | Gram Stain                                       | 0.20  | Procedure   |
| Consumables | Immersion oil                                    | 0.02  | Sample      |
| Consumables | Kit assembly costs - Chlamydia                   | 3.22  | Item        |
| Consumables | KY Lubricant                                     | 0.30  | Application |
| Consumables | Lab Request form with bag                        | 0.10  | Item        |
| Consumables | Laboratory/pathology request form                | 0.26  | Item        |
| Consumables | Letter notification                              | 0.58  | Item        |
| Consumables | Literature (STI)                                 | 0.06  | Item        |
| Consumables | Loops                                            | 0.60  | Item        |
| Consumables | Male Condom                                      | 0.06  | Item        |
| Consumables | Microscope slide (qty 1)                         | 0.07  | Item        |
| Consumables | Needle                                           | 0.03  | Item        |

| Type        | Item                                            | Cost | Unit             |
|-------------|-------------------------------------------------|------|------------------|
| Consumables | Paper                                           | 0.02 | Item             |
| Consumables | pH paper                                        | 0.10 | Item             |
| Consumables | Phone call                                      | 0.07 | Minute           |
| Consumables | PN slip                                         | 0.05 | Item             |
| Consumables | Saline                                          | 0.20 | Item             |
| Consumables | Sample Collection Instructions                  | 0.05 | Item             |
| Consumables | Slide                                           | 0.05 | Item             |
| Consumables | SMS Text message                                | 0.10 | Item             |
| Consumables | Speculum                                        | 0.82 | Item             |
| Consumables | Stains for microscopy                           | 0.65 | Item             |
| Consumables | Sterets/antiseptic wipe                         | 0.02 | Item             |
| Consumables | Swab                                            | 0.02 | Item             |
| Consumables | Syringe 10ml Luer Slip Syringe                  | 0.11 | Item             |
| Consumables | Transport tube                                  | 0.26 | Item             |
| Consumables | Urine Pot, sterile collection                   | 0.23 | Item             |
| Consumables | Urine Specimen Container (PCR Tube and Pipette) | 1.04 | Item             |
| Consumables | Vacutainer                                      | 0.02 | Item             |
| Consumables | Vulvo-vaginal swab                              | 0.16 | Sample           |
| Drugs       | Azithromycin (1000 mg)                          | 4.50 | Treatment Course |
| Drugs       | Ceftriaxone (500 mg)                            | 5.09 | Treatment Course |

**Table B: Descriptions of clinical steps involved in chlamydia / gonorrhoea testing and treatment pathways.**

| Step name                      | Activity                                                                                                                                                                                                                                                                                           |
|--------------------------------|----------------------------------------------------------------------------------------------------------------------------------------------------------------------------------------------------------------------------------------------------------------------------------------------------|
| Consultation                   | Meet with clinician, discuss reason for attendance and any other issues, e.g. risk behaviour.                                                                                                                                                                                                      |
| Contact positives              | For patients with a positive or equivocal test result, extra time is allocated to ensure that they receive their result and attend for treatment, e.g. extra phone calls and follow-up.                                                                                                            |
| Exam                           | Clinical examination including physical genital exam, with swabs or samples taken as appropriate.                                                                                                                                                                                                  |
| Health Promotion               | Discussion around safer sex and reducing risk behaviours.                                                                                                                                                                                                                                          |
| Microscopy                     | Samples (genital swabs) prepared and read in the clinic laboratory.                                                                                                                                                                                                                                |
| Off-site sample processing     | External step – sample is sent off-site for laboratory processing.                                                                                                                                                                                                                                 |
| Partner notification           | Discussion around importance of having partners notified and treated, and whether patients need assistance in reaching partners.                                                                                                                                                                   |
| Patient registration           | The patient registers, either face to face with a receptionist/administrator, or using an electronic kiosk or computer, and asked about reason for attendance, symptoms, risk factors, etc. A pro forma is often used. This step includes time to retrieve patient notes.                          |
| POCT                           | Chlamydia/gonorrhoea point of care test: staff process urine sample or swab, prepare cartridge for POC NAAT machine, and retrieve and review results.                                                                                                                                              |
| Prepare test kits              | Make the test kits for the self-service machines in clinics.                                                                                                                                                                                                                                       |
| Receive samples                | Process and prepare self-collected samples to be sent for off-site sample processing or processed in POC test.                                                                                                                                                                                     |
| Results                        | Consultation with patients about their positive results (negative result generally does not require a consultation).                                                                                                                                                                               |
| Results management             | Managing the results when they come in from the laboratory (e.g. inputting on IT system) or the POCT if patients have already left the clinic, notifying patients of their results by text message (~95%), letter or by telephone call, and requesting that positive patients return for treatment |
| Sample collection              | Urine or vaginal swab samples taken for chlamydia and gonorrhoea NAAT testing, and/or blood samples obtained for HIV and syphilis testing, and/or swabs taken for gonorrhoea culture. Staff process samples and prepare for testing (either sent to an off-site laboratory or POCT in the clinic). |
| Supported partner notification | Clinic staff will notify partners for patients requesting assistance.                                                                                                                                                                                                                              |
| Treatment                      | Drugs given in clinic, along with advice on safer sex.                                                                                                                                                                                                                                             |

**Table C: Additional chlamydia and gonorrhoea testing and treatment pathways.**

| Pathway                                                                                            | Clinical steps                                                                                                                   | As Primary Pathway |            | As Additional Pathway |            |
|----------------------------------------------------------------------------------------------------|----------------------------------------------------------------------------------------------------------------------------------|--------------------|------------|-----------------------|------------|
|                                                                                                    |                                                                                                                                  | Cost per patient   | Time (min) | Cost per patient      | Time (min) |
| <b>A) Rapid sexual health screening for asymptomatic patients.</b>                                 |                                                                                                                                  |                    |            |                       |            |
| Asymptomatic Rapid SHS (current)                                                                   | Consultation / Sample collection* <sup>†</sup> → Off-site sample processing (1-2 weeks) → Results management → Contact positives | £62.16             | 21.2       | £54.17                | 11.1       |
| <b>B) Current and proposed self-service pathways for asymptomatic patients.</b>                    |                                                                                                                                  |                    |            |                       |            |
| Asymptomatic Self-service (current)                                                                | Prepare kits → Receive sample → Off-site sample processing (1-2 weeks) → Results management → Contact positives                  | £24.37             | 14.9       | £23.70                | 14.2       |
| Asymptomatic Self-service POC (proposed)                                                           | Prepare kits → Receive sample → POCT (90 min) → Results management → Contact positives                                           | £32.60             | 14.9       | £31.94                | 14.2       |
| <b>C) Gonorrhoea follow up visit for second line treatment after failure of initial treatment.</b> |                                                                                                                                  |                    |            |                       |            |
| 2 <sup>nd</sup> Gonorrhoea treatment (current)                                                     | Exam → Treatment → Health promotion / Partner notification                                                                       | £41.07             | 35.0       | £33.97                | 25.0       |

**Table C: Additional chlamydia and gonorrhoea testing and treatment pathways.** Pathway steps, cost per patient, and health care professionals' time is shown. The first step, patient registration, is common to all pathways and is not shown. Detailed descriptions of all clinical steps are provided in Table B. **(A) Rapid sexual health screening for asymptomatic patients.** After registration, patients have a combined short consultation and blood test for syphilis and HIV, provide a self-collected sample for chlamydia and gonorrhoea (urine for men and self-taken vaginal swab for women), and then leave the clinic. In some cases, a rapid HIV test would be given instead of the standard HIV laboratory test if deemed appropriate and available, such as in high-risk groups like men who have sex with men or those with multiple partners. \*Urine/vulvo-vaginal swab collected for chlamydia and gonorrhoea testing. <sup>†</sup>Blood sample collected for HIV and syphilis testing. **(B) Current and proposed self-service pathways for asymptomatic patients.** In self-service testing, patients register at a machine, and if no symptoms are reported, they are offered a chlamydia/gonorrhoea test and/or pregnancy test. Patients then drop off a self-provided sample in the clinic and leave, with no direct clinical contact. Results management follows, in which most patients would receive a text message (SMS) of their results, with extra time allowed to ensure positives are contacted and attend for treatment. **(C) Gonorrhoea follow up visit for second line treatment after failure of initial treatment.** In the case of primary treatment failure, a follow-up visit is necessary for second-line gonorrhoea treatment with cefixime and azithromycin.

**Table D: Potential benefits and limitations of a POC NAAT for chlamydia and gonorrhoea in a GUM clinic.**

| <b>Benefits</b>                                                                                                                                          | <b>Concerns/considerations</b>                                                                                                                                                     |
|----------------------------------------------------------------------------------------------------------------------------------------------------------|------------------------------------------------------------------------------------------------------------------------------------------------------------------------------------|
| Same day diagnosis and treatment for positive patients, improving treatment rates and preventing onward transmission, reducing the risk of complications | Staff time would be diverted from patient contact to running the test                                                                                                              |
| Quicker results for patients, alleviating anxiety                                                                                                        | Staff would need to be trained in running the test and reporting results                                                                                                           |
| One clinic visit for positive patients rather than two visits (one for the test and one for treatment)                                                   | Changes in how services are managed and workflow                                                                                                                                   |
| Reducing overtreatment from presumptive treatment, to minimise development of antimicrobial resistance                                                   | Some patients may get results in two hours, others may have to wait longer if capacity has not been planned properly, although capacity is very flexible and can be changed easily |
| Potential to reduce the number of clinic visits, which means more time available to other patients                                                       | Implications of reducing the number of samples sent to laboratories, e.g. clinics may have contracts in place, and loss of business to central laboratories                        |
| Greater confidence for clinicians in providing quick and appropriate treatment                                                                           | Clinics may need to assume responsibility for quality assurance of testing and reporting                                                                                           |
| Attracting new clients who would not normally come in for a test                                                                                         | Other tests may become available in the near future, yet clinics would be tied into a contract if they are early adopters                                                          |
| Reduces the number of people lost to follow up i.e. test positive but do not return for treatment                                                        | Could result in loss of income to clinic in standard first / follow up tariff payment system                                                                                       |
| Fast track testing service for partners reducing the need for presumptive treatment                                                                      | Patients may need to wait in the clinic for their results for 2 hours                                                                                                              |
| Efficiencies realised in clinic enable capacity to be released and utilised elsewhere                                                                    |                                                                                                                                                                                    |

## References

1. Pathway Analytics. Sexual Health Tariff. <http://www.pathwayanalytics.com/sexual-health/about-the-tariff> Last accessed: 25/06/2014
2. London Sexual Health Programme. The Sexual Health Tariff. <http://www.londonsexualhealth.org/projects/tariffs.html> Last accessed: 18/1/2013

1  
2  
3  
4  
5  
6  
7  
8  
9  
10  
11  
12  
13  
14  
15  
16  
17  
18  
19  
20  
21  
22  
23  
24  
25  
26  
27  
28  
29  
30  
31  
32  
33  
34  
35  
36  
37  
38  
39  
40  
41  
42  
43  
44  
45  
46  
47

**PATHWAY**

Pathway Name: **Current chlamydia and gonorrhoea only testing**

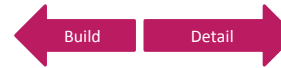

| Step Number           | Step Name | Activity               | Primary Pathway Minutes | Additional Pathway Proportional |
|-----------------------|-----------|------------------------|-------------------------|---------------------------------|
| <b>Time (minutes)</b> |           |                        |                         |                                 |
| <b>Total</b>          |           | <i>Primary Pathway</i> | <b>32.8</b>             | <b>15.7</b>                     |

|                           |      |     |
|---------------------------|------|-----|
| Doctor/7/8                |      |     |
| Blend Nurse 7/8           |      |     |
| Blend all com SRH N2 - Dr | 21.0 | 9.0 |
| Blend HA                  |      |     |
| Blend Nurse 5/6/7/8       | 0.8  | 0.8 |
| Blend Nurse 5/6           | 6.0  | 6.0 |
| Admin/clerical            | 5.0  |     |

| 1                     | 2            | 3                        | 4                | 5         | 6                  | 7                     |
|-----------------------|--------------|--------------------------|------------------|-----------|--------------------|-----------------------|
| Register Meet + Greet | Consultation | Tests + Supporting Admin | Health Promotion | Pathology | Results Management | Contact Pos. + Equiv. |
| 100%<br>5             | 100%<br>9    | 100%<br>6                | 100%<br>6        | 100%<br>0 | 100%<br>6          | 5%<br>15              |
| 0%                    | 33%          | 100%                     | 0%               | 100%      | 100%               | 100%                  |

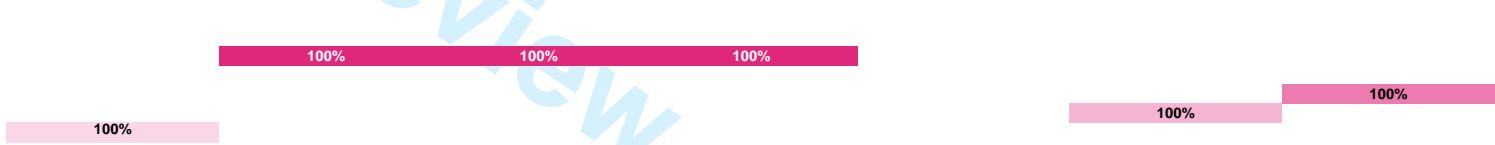

**Non-Staff Inputs Key code:**

- Consumables
- Drugs
- Equipment
- Other
- Pathology
- Custom

|                                                       |                      |                             |                          |                          |
|-------------------------------------------------------|----------------------|-----------------------------|--------------------------|--------------------------|
| Gloves                                                | KY Lubricant (2)     | Chlamydia & Gonorrhoea NAAT | Letter notification (2%) | Letter notification (5%) |
| Lab Request form with bag - Chlamydia                 | Literature (STI) (3) |                             | Phone call (3%)          | Phone call (5%)          |
| Sample Collection Instructions                        | Male Condom (10)     |                             | SMS Text message (95%)   | SMS Text message (90%)   |
| Transport tube                                        |                      |                             |                          |                          |
| Urine Pot, sterile collection (0.7)                   |                      |                             |                          |                          |
| Urine Specimen Container (PCR Tube and Pipette) (0.7) |                      |                             |                          |                          |
| Vulvo-vaginal swab (0.3)                              |                      |                             |                          |                          |

Current chlamydia and gonorrhoea only testing

PDF Options

| Staff                     | Total Primary Cost (£) | Total Additional Cost (£) |
|---------------------------|------------------------|---------------------------|
| Doctor/7/8                |                        |                           |
| Blend Nurse 7/8           |                        |                           |
| Blend all com SRH N2 - Dr | 22.16                  | 9.46                      |
| Blend HA                  |                        |                           |
| Blend Nurse 5/6/7/8       | 0.67                   | 0.67                      |
| Blend Nurse 5/6           | 4.50                   | 4.50                      |
| Admin/clerical            | 2.64                   | 0.00                      |
| <b>Total</b>              | <b>29.96</b>           | <b>14.63</b>              |
| Non-Staff                 | Total Primary Cost (£) | Total Additional Cost (£) |
| Consumables               | 2.87                   | 1.51                      |
| Drugs                     |                        |                           |
| Equipment                 |                        |                           |
| Other                     |                        |                           |
| Pathology                 | 12.51                  | 12.51                     |
| Custom                    |                        |                           |
| <b>Total</b>              | <b>15.38</b>           | <b>14.02</b>              |
| <b>Grand Total</b>        | <b>45.34</b>           | <b>28.65</b>              |

| Step Number | Step Name                | Activity | Time (mins) | Type        | Name                                            | Cost (£) | Unit        | Quantity | Total Primary Cost (£) | Additional | Total Additional Cost (£) |
|-------------|--------------------------|----------|-------------|-------------|-------------------------------------------------|----------|-------------|----------|------------------------|------------|---------------------------|
| 1           | Register Meet + Greet    |          | 100%        | 5 Staff     | Admin/clerical                                  | £0.53    | Minute      | 100%     | £2.64                  | 0%         | £0.00                     |
| 2           | Consultation             |          | 100%        | 9 Staff     | Blend all com SRH N2 - Dr                       | £1.06    | Minute      | 100%     | £9.50                  | 33%        | £3.13                     |
| 3           | Tests + Supporting Admin |          | 100%        | 6 Staff     | Blend all com SRH N2 - Dr                       | £1.06    | Minute      | 100%     | £6.33                  | 100%       | £6.33                     |
| 3           | Tests + Supporting Admin |          | 100%        | Consumables | Gloves                                          | £0.05    | Pair        | 1        | £0.05                  | 100%       | £0.05                     |
| 3           | Tests + Supporting Admin |          | 100%        | Consumables | Lab Request form with bag - Chlamydia           | £0.10    | Item        | 1        | £0.10                  | 100%       | £0.10                     |
| 3           | Tests + Supporting Admin |          | 100%        | Consumables | Sample Collection Instructions                  | £0.05    | Item        | 1        | £0.05                  | 100%       | £0.05                     |
| 3           | Tests + Supporting Admin |          | 100%        | Consumables | Transport tube                                  | £0.26    | Item        | 1        | £0.26                  | 100%       | £0.26                     |
| 3           | Tests + Supporting Admin |          | 100%        | Consumables | Urine Pot, sterile collection                   | £0.23    | Item        | 70%      | £0.16                  | 100%       | £0.16                     |
| 3           | Tests + Supporting Admin |          | 100%        | Consumables | Urine Specimen Container (PCR Tube and Pipette) | £1.04    | Item        | 70%      | £0.73                  | 100%       | £0.73                     |
| 3           | Tests + Supporting Admin |          | 100%        | Consumables | Vulvo-vaginal swab                              | £0.16    | Sample      | 30%      | £0.05                  | 100%       | £0.05                     |
| 4           | Health Promotion         |          | 100%        | 6 Staff     | Blend all com SRH N2 - Dr                       | £1.06    | Minute      | 100%     | £6.33                  | 0%         | £0.00                     |
| 4           | Health Promotion         |          | 100%        | Consumables | KY Lubricant                                    | £0.30    | Application | 2        | £0.60                  | 0%         | £0.00                     |
| 4           | Health Promotion         |          | 100%        | Consumables | Literature (STI)                                | £0.06    | Item        | 3        | £0.18                  | 0%         | £0.00                     |
| 4           | Health Promotion         |          | 100%        | Consumables | Male Condom                                     | £0.06    | Item        | 10       | £0.58                  | 0%         | £0.00                     |
| 5           | Pathology                |          | 100%        | Pathology   | Chlamydia & Gonorrhoea NAAT                     | £12.51   | Sample      | 1        | £12.51                 | 100%       | £12.51                    |
| 6           | Results Management       |          | 100%        | 6 Staff     | Blend Nurse 5/6                                 | £0.75    | Minute      | 100%     | £4.50                  | 100%       | £4.50                     |
| 6           | Results Management       |          | 100%        | Consumables | Letter notification                             | £0.58    | Item        | 2%       | £0.01                  | 100%       | £0.01                     |
| 6           | Results Management       |          | 100%        | Consumables | Phone call                                      | £0.07    | Minute      | 3%       | £0.00                  | 100%       | £0.00                     |
| 6           | Results Management       |          | 100%        | Consumables | SMS Text message                                | £0.10    | Item        | 95%      | £0.10                  | 100%       | £0.10                     |
| 7           | Contact Pos. + Equiv.    |          | 5%          | 15 Staff    | Blend Nurse 5/6/7/8                             | £0.89    | Minute      | 100%     | £0.67                  | 100%       | £0.67                     |
| 7           | Contact Pos. + Equiv.    |          | 5%          | Consumables | Letter notification                             | £0.58    | Item        | 5%       | £0.00                  | 100%       | £0.00                     |
| 7           | Contact Pos. + Equiv.    |          | 5%          | Consumables | Phone call                                      | £0.07    | Minute      | 5%       | £0.00                  | 100%       | £0.00                     |
| 7           | Contact Pos. + Equiv.    |          | 5%          | Consumables | SMS Text message                                | £0.10    | Item        | 90%      | £0.00                  | 100%       | £0.00                     |



1  
2  
3  
4  
5  
6  
7  
8  
9  
10  
11  
12  
13  
14  
15  
16  
17  
18  
19  
20  
21  
22  
23  
24  
25  
26  
27  
28  
29  
30  
31  
32  
33  
34  
35  
36  
37  
38  
39  
40  
41  
42  
43  
44  
45  
46  
47

# PATHWAY

Pathway Name: POC chlamydia and gonorrhoea only testing

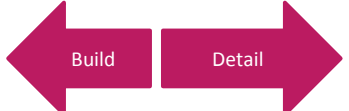

| Step Number               | Step Name | Activity               | Primary Pathway Minutes | Additional Pathway Proportional |
|---------------------------|-----------|------------------------|-------------------------|---------------------------------|
| <b>Time (minutes)</b>     |           |                        |                         |                                 |
|                           |           | <i>Primary Pathway</i> | <i>21.8</i>             | <i>13.4</i>                     |
| <b>Total</b>              |           |                        |                         |                                 |
| Doctor/7/8                |           |                        |                         |                                 |
| Blend Nurse 7/8           |           |                        |                         |                                 |
| Blend all com SRH N2 - Dr | 5.0       |                        |                         | 1.7                             |
| Blend HA                  |           |                        |                         |                                 |
| Blend Nurse 5/6/7/8       | 5.8       |                        |                         | 5.8                             |
| Blend Nurse 5/6           | 6.0       |                        |                         | 6.0                             |
| Admin/clerical            | 5.0       |                        |                         |                                 |

|  | 1                     | 2            | 3        | 4                  | 5                     |
|--|-----------------------|--------------|----------|--------------------|-----------------------|
|  | Register Meet + Greet | Consultation | PoC Test | Results Management | Contact Pos. + Equiv. |
|  | 100%                  | 100%         | 100%     | 100%               | 5%                    |
|  | 5                     | 5            | 5        | 6                  | 15                    |
|  | 0%                    | 33%          | 100%     | 100%               | 100%                  |
|  |                       |              |          |                    |                       |
|  |                       | 100%         |          |                    |                       |
|  |                       |              | 100%     |                    | 100%                  |
|  | 100%                  |              |          | 100%               |                       |

| Non-Staff Inputs Key code: | Consumables          | Drugs | Equipment                           | Other            | Pathology                  |
|----------------------------|----------------------|-------|-------------------------------------|------------------|----------------------------|
|                            | KY Lubricant (2)     |       | Cepheid Sample Collection Kit       | SMS Text message | Letter notification (0.05) |
|                            | Literature (STI) (3) |       | Gloves                              |                  | Phone call (0.05)          |
|                            | Male Condom (10)     |       | Sample Collection Instructions      |                  | SMS Text message (0.9)     |
|                            |                      |       | Urine Pot, sterile collection (0.7) |                  |                            |
|                            |                      |       | Cepheid PoC CT/GC Test              |                  |                            |

POC chlamydia and gonorrhoea only testing

PDF Options

| Staff                     | Total Primary Cost (£) | Total Additional Cost (£) |
|---------------------------|------------------------|---------------------------|
| Doctor/7/8                |                        |                           |
| Blend Nurse 7/8           |                        |                           |
| Blend all com SRH N2 - Dr | 5.28                   | 1.74                      |
| Blend HA                  |                        |                           |
| Blend Nurse 5/6/7/8       | 5.13                   | 5.13                      |
| Blend Nurse 5/6           | 4.50                   | 4.50                      |
| Admin/clerical            | 2.64                   | 0.00                      |
| <b>Total</b>              | <b>17.54</b>           | <b>11.37</b>              |
| Non-Staff                 | Total Primary Cost (£) | Total Additional Cost (£) |
| Consumables               | 3.22                   | 3.22                      |
| Drugs                     |                        |                           |
| Equipment                 |                        |                           |
| Other                     |                        |                           |
| Pathology                 | 18.00                  | 18.00                     |
| Custom                    |                        |                           |
| <b>Total</b>              | <b>21.22</b>           | <b>21.22</b>              |
| <b>Grand Total</b>        | <b>38.76</b>           | <b>32.59</b>              |

| Step Number | Step Name             | Activity | Time (mins) | Type        | Name                           | Cost (£) | Unit        | Quantity | Total Primary Cost (£) | Additional | Total Additional Cost (£) |
|-------------|-----------------------|----------|-------------|-------------|--------------------------------|----------|-------------|----------|------------------------|------------|---------------------------|
| 1           | Register Meet + Greet |          | 100%        | 5 Staff     | Admin/clerical                 | £0.53    | Minute      | 100%     | £2.64                  | 0%         | £0.00                     |
| 2           | Consultation          |          | 100%        | 5 Staff     | Blend all com SRH N2 - Dr      | £1.06    | Minute      | 100%     | £5.28                  | 33%        | £1.74                     |
| 2           | Consultation          |          | 100%        | Consumables | KY Lubricant                   | £0.30    | Application | 2        | £0.60                  | 33%        | £0.60                     |
| 2           | Consultation          |          | 100%        | Consumables | Literature (STI)               | £0.06    | Item        | 3        | £0.18                  | 33%        | £0.18                     |
| 2           | Consultation          |          | 100%        | Consumables | Male Condom                    | £0.06    | Item        | 10       | £0.58                  | 33%        | £0.58                     |
| 3           | PoC Test              |          | 100%        | 5 Staff     | Blend Nurse 5/6/7/8            | £0.89    | Minute      | 100%     | £4.46                  | 100%       | £4.46                     |
| 3           | PoC Test              |          | 100%        | Consumables | Cepheid Sample Collection Kit  | £1.50    | Item        | 1        | £1.50                  | 100%       | £1.50                     |
| 3           | PoC Test              |          | 100%        | Consumables | Gloves                         | £0.05    | Pair        | 1        | £0.05                  | 100%       | £0.05                     |
| 3           | PoC Test              |          | 100%        | Consumables | Sample Collection Instructions | £0.05    | Item        | 1        | £0.05                  | 100%       | £0.05                     |
| 3           | PoC Test              |          | 100%        | Consumables | Urine Pot, sterile collection  | £0.23    | Item        | 0.7      | £0.16                  | 100%       | £0.16                     |
| 3           | PoC Test              |          | 100%        | Pathology   | Cepheid PoC CT/GC Test         | £18.00   | Sample      | 1        | £18.00                 | 100%       | £18.00                    |
| 4           | Results Management    |          | 100%        | 6 Staff     | Blend Nurse 5/6                | £0.75    | Minute      | 100%     | £4.50                  | 100%       | £4.50                     |
| 4           | Results Management    |          | 100%        | Consumables | SMS Text message               | £0.10    | Item        | 100%     | £0.10                  | 100%       | £0.10                     |
| 5           | Contact Pos. + Equiv. |          | 5%          | 15 Staff    | Blend Nurse 5/6/7/8            | £0.89    | Minute      | 100%     | £0.67                  | 100%       | £0.67                     |
| 5           | Contact Pos. + Equiv. |          | 5%          | Consumables | Letter notification            | £0.58    | Item        | 0.05     | £0.00                  | 100%       | £0.00                     |
| 5           | Contact Pos. + Equiv. |          | 5%          | Consumables | Phone call                     | £0.07    | Minute      | 0.05     | £0.00                  | 100%       | £0.00                     |
| 5           | Contact Pos. + Equiv. |          | 5%          | Consumables | SMS Text message               | £0.10    | Item        | 0.9      | £0.00                  | 100%       | £0.00                     |

1  
2  
3  
4  
5  
6  
7  
8  
9  
10  
11  
12  
13  
14  
15  
16  
17  
18  
19  
20  
21  
22  
23  
24  
25  
26  
27  
28  
29  
30  
31  
32  
33  
34  
35  
36  
37  
38  
39  
40  
41  
42  
43  
44  
45  
46  
47

# PATHWAY

Pathway Name: Current sexual health screen for asymptomatic patients

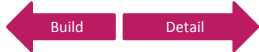

|                           | Step Number            | Step Name                 | Activity                        |
|---------------------------|------------------------|---------------------------|---------------------------------|
|                           |                        |                           | Primary Pathway Minutes         |
|                           |                        |                           | Additional Pathway Proportional |
| <b>Time (minutes)</b>     | <i>Primary Pathway</i> | <i>Additional Pathway</i> |                                 |
| <b>Total</b>              | <b>37.2</b>            | <b>12.3</b>               |                                 |
| <b>Doctor/7/8</b>         |                        |                           |                                 |
| Blend Nurse 7/8           | 0.1                    | 0.0                       |                                 |
| Blend all com SRH N2 - Dr | 26.0                   | 6.3                       |                                 |
| Blend HA                  | 0.1                    | 0.0                       |                                 |
| Blend Nurse 5/6/7/8       |                        |                           |                                 |
| Blend Nurse 5/6           | 6.0                    | 6.0                       |                                 |
| Admin/clerical            | 5.0                    |                           |                                 |

|             | 1                     | 2            | 3          | 4                | 5         | 6                  | 7                     |
|-------------|-----------------------|--------------|------------|------------------|-----------|--------------------|-----------------------|
|             | Register Meet + Greet | Consultation | Blood Work | Health Promotion | Pathology | Results Management | Contact Pos. + Equiv. |
| <b>100%</b> | 100%                  | 100%         | 100%       | 100%             | 100%      | 100%               | 1%                    |
| <b>5</b>    | 5                     | 15           | 5          | 6                |           | 6                  | 15                    |
| <b>0%</b>   | 0%                    | 25%          | 50%        | 0%               | 100%      | 100%               | 50%                   |

|      |  |  |  |  |  |      |     |
|------|--|--|--|--|--|------|-----|
| 100% |  |  |  |  |  |      |     |
|      |  |  |  |  |  |      | 50% |
|      |  |  |  |  |  |      | 50% |
|      |  |  |  |  |  | 100% |     |
| 100% |  |  |  |  |  |      |     |

**Non-Staff Inputs Key code:**

- Consumables
- Drugs
- Equipment
- Other
- Pathology
- Custom

|                                                       |                                |                      |                                                    |                            |                            |
|-------------------------------------------------------|--------------------------------|----------------------|----------------------------------------------------|----------------------------|----------------------------|
| Sample Collection Instructions                        | Bandages/ plasters             | KY Lubricant (2)     | Chlamydia & Gonorrhoea NAAT                        | Letter notification (0.02) | Letter notification (0.05) |
| Urine Pot, sterile collection (0.7)                   | Blood tube                     | Literature (STI) (3) | HIV Serum test (4th Generation)                    | Phone call (0.03)          | Phone call (0.05)          |
| Urine Specimen Container (PCR Tube and Pipette) (0.7) | Cotton Wool                    | Male Condom (10)     | Syphilis Immunossassy - Total antibody (IgG & IgM) | SMS Text message (0.95)    | SMS Text message (0.9)     |
| Vulvo-vaginal swab (0.3)                              | Gloves                         |                      |                                                    |                            |                            |
|                                                       | Lab Request form with bag      |                      |                                                    |                            |                            |
|                                                       | Needle                         |                      |                                                    |                            |                            |
|                                                       | Sterets/antiseptic wipe        |                      |                                                    |                            |                            |
|                                                       | Syringe 10ml Luer Slip Syringe |                      |                                                    |                            |                            |
|                                                       | Transport tube                 |                      |                                                    |                            |                            |
|                                                       | Vacutainer                     |                      |                                                    |                            |                            |

**DETAIL Current sexual health screen for asymptomatic patients**

| Staff                     | Total Primary Cost (£) | Total Additional Cost (£) |
|---------------------------|------------------------|---------------------------|
| Doctor/7/8                |                        |                           |
| Blend Nurse 7/8           | 0.08                   | 0.04                      |
| Blend all com SRH N2 - Dr | 27.43                  | 6.59                      |
| Blend HA                  | 0.08                   | 0.04                      |
| Blend Nurse 5/6/7/8       |                        |                           |
| Blend Nurse 5/6           | 4.50                   | 4.50                      |
| Admin/clerical            | 2.64                   | 0.00                      |
| <b>Total</b>              | <b>34.73</b>           | <b>11.18</b>              |
| Non-Staff                 | Total Primary Cost (£) | Total Additional Cost (£) |
| Consumables               |                        |                           |
| Drugs                     | 3.25                   | 1.89                      |
| Equipment                 |                        |                           |
| Other                     |                        |                           |
| Pathology                 | 41.79                  | 41.79                     |
| Custom                    |                        |                           |
| <b>Total</b>              | <b>45.04</b>           | <b>43.68</b>              |
| <b>Grand Total</b>        | <b>79.77</b>           | <b>54.86</b>              |

PDF Options

| Step Number | Step Name             | Activity | Time (mins) | Type        | Name                                              | Cost (£) | Unit        | Quantity | Total Primary Cost (£) | Additional | Total Additional Cost (£) |
|-------------|-----------------------|----------|-------------|-------------|---------------------------------------------------|----------|-------------|----------|------------------------|------------|---------------------------|
| 1           | Register Meet + Greet |          | 100%        | 5 Staff     | Admin/clerical                                    | £0.53    | Minute      | 100%     | £2.64                  | 0%         | £0.00                     |
| 2           | Consultation          |          | 100%        | 15 Staff    | Blend all com SRH N2 - Dr                         | £1.06    | Minute      | 100%     | £15.83                 | 25%        | £3.96                     |
| 2           | Consultation          |          | 100%        | Consumables | Sample Collection Instructions                    | £0.05    | Item        | 1        | £0.05                  | 25%        | £0.05                     |
| 2           | Consultation          |          | 100%        | Consumables | Urine Pot, sterile collection                     | £0.23    | Item        | 0.7      | £0.16                  | 25%        | £0.16                     |
| 2           | Consultation          |          | 100%        | Consumables | Urine Specimen Container (PCR Tube and Pipette)   | £1.04    | Item        | 0.7      | £0.73                  | 25%        | £0.73                     |
| 2           | Consultation          |          | 100%        | Consumables | Vulvo-vaginal swab                                | £0.16    | Sample      | 0.3      | £0.05                  | 25%        | £0.05                     |
| 3           | Blood Work            |          | 100%        | 5 Staff     | Blend all com SRH N2 - Dr                         | £1.06    | Minute      | 100%     | £5.28                  | 50%        | £2.64                     |
| 3           | Blood Work            |          | 100%        | Consumables | Bandages/ plasters                                | £0.07    | Item        | 1        | £0.07                  | 50%        | £0.07                     |
| 3           | Blood Work            |          | 100%        | Consumables | Blood tube                                        | £0.12    | Item        | 1        | £0.12                  | 50%        | £0.12                     |
| 3           | Blood Work            |          | 100%        | Consumables | Cotton Wool                                       | £0.01    | Item        | 1        | £0.01                  | 50%        | £0.01                     |
| 3           | Blood Work            |          | 100%        | Consumables | Gloves                                            | £0.05    | Pair        | 1        | £0.05                  | 50%        | £0.05                     |
| 3           | Blood Work            |          | 100%        | Consumables | Lab Request form with bag                         | £0.10    | Item        | 1        | £0.10                  | 50%        | £0.10                     |
| 3           | Blood Work            |          | 100%        | Consumables | Needle                                            | £0.03    | Item        | 1        | £0.03                  | 50%        | £0.03                     |
| 3           | Blood Work            |          | 100%        | Consumables | Sterets/antiseptic wipe                           | £0.02    | Item        | 1        | £0.02                  | 50%        | £0.02                     |
| 3           | Blood Work            |          | 100%        | Consumables | Syringe 10ml Luer Slip Syringe                    | £0.11    | Item        | 1        | £0.11                  | 50%        | £0.11                     |
| 3           | Blood Work            |          | 100%        | Consumables | Transport tube                                    | £0.26    | Item        | 1        | £0.26                  | 50%        | £0.26                     |
| 3           | Blood Work            |          | 100%        | Consumables | Vacutainer                                        | £0.02    | Item        | 1        | £0.02                  | 50%        | £0.02                     |
| 4           | Health Promotion      |          | 100%        | 6 Staff     | Blend all com SRH N2 - Dr                         | £1.06    | Minute      | 100%     | £6.33                  | 0%         | £0.00                     |
| 4           | Health Promotion      |          | 100%        | Consumables | KY Lubricant                                      | £0.30    | Application | 2        | £0.60                  | 0%         | £0.00                     |
| 4           | Health Promotion      |          | 100%        | Consumables | Literature (STI)                                  | £0.06    | Item        | 3        | £0.18                  | 0%         | £0.00                     |
| 4           | Health Promotion      |          | 100%        | Consumables | Male Condom                                       | £0.06    | Item        | 10       | £0.58                  | 0%         | £0.00                     |
| 5           | Pathology             |          | 100%        | Pathology   | Chlamydia & Gonorrhoea NAAT                       | £12.51   | Sample      | 1        | £12.51                 | 100%       | £12.51                    |
| 5           | Pathology             |          | 100%        | Pathology   | HIV Serum test (4th Generation)                   | £12.78   | Sample      | 1        | £12.78                 | 100%       | £12.78                    |
| 5           | Pathology             |          | 100%        | Pathology   | Syphilis immunosassy - Total antibody (IgG & IgM) | £16.50   | Sample      | 1        | £16.50                 | 100%       | £16.50                    |
| 6           | Results Management    |          | 100%        | 6 Staff     | Blend Nurse 5/6                                   | £0.75    | Minute      | 100%     | £4.50                  | 100%       | £4.50                     |
| 6           | Results Management    |          | 100%        | Consumables | Letter notification                               | £0.58    | Item        | 0.02     | £0.01                  | 100%       | £0.01                     |
| 6           | Results Management    |          | 100%        | Consumables | Phone call                                        | £0.07    | Minute      | 0.03     | £0.00                  | 100%       | £0.00                     |
| 6           | Results Management    |          | 100%        | Consumables | SMS Text message                                  | £0.10    | Item        | 0.95     | £0.10                  | 100%       | £0.10                     |
| 7           | Contact Pos. + Equiv. |          | 1%          | 15 Staff    | Blend Nurse 7/8                                   | £1.10    | Minute      | 50%      | £0.08                  | 50%        | £0.04                     |
| 7           | Contact Pos. + Equiv. |          | 1%          | 15 Staff    | Blend HA                                          | £1.03    | Minute      | 50%      | £0.08                  | 50%        | £0.04                     |
| 7           | Contact Pos. + Equiv. |          | 1%          | Consumables | Letter notification                               | £0.58    | Item        | 5%       | £0.00                  | 50%        | £0.00                     |
| 7           | Contact Pos. + Equiv. |          | 1%          | Consumables | Phone call                                        | £0.07    | Minute      | 5%       | £0.00                  | 50%        | £0.00                     |
| 7           | Contact Pos. + Equiv. |          | 1%          | Consumables | SMS Text message                                  | £0.10    | Item        | 90%      | £0.00                  | 50%        | £0.00                     |

1  
2  
3  
4  
5  
6  
7  
8  
9  
10  
11  
12  
13  
14  
15  
16  
17  
18  
19  
20  
21  
22  
23  
24  
25  
26  
27  
28  
29  
30  
31  
32  
33  
34  
35  
36  
37  
38  
39  
40  
41  
42  
43  
44  
45  
46  
47

**PATHWAY**

Pathway Name: **POC1 sexual health screen for asymptomatic patients**

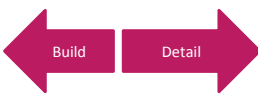

| Step Number               | Step Name | Activity | Time (minutes)  |                    |
|---------------------------|-----------|----------|-----------------|--------------------|
|                           |           |          | Primary Pathway | Additional Pathway |
| <b>Total</b>              |           |          | <b>31.2</b>     | <b>21.1</b>        |
| Doctor/7/8                |           |          |                 |                    |
| Blend Nurse 7/8           |           |          | 0.1             | 0.0                |
| Blend all com SRH N2 - Dr |           |          | 10.0            | 5.0                |
| Blend HA                  |           |          | 0.1             | 0.0                |
| Blend Nurse 5/6/7/8       |           |          | 5.0             | 5.0                |
| Blend Nurse 5/6           |           |          | 11.0            | 11.0               |
| Admin/clerical            |           |          | 5.0             |                    |

| 1                     | 2                         | 3                         | 4                        | 5         | 6                        | 7                     |
|-----------------------|---------------------------|---------------------------|--------------------------|-----------|--------------------------|-----------------------|
| Register Meet + Greet | Blood Test + Consultation | PoC Test + Review Results | Results Management (PoC) | Pathology | Results Management (Lab) | Contact Pos. + Equiv. |
| 100%                  | 100%                      | 100%                      | 100%                     | 100%      | 100%                     | 1%                    |
| 5                     | 10                        | 5                         | 5                        |           | 6                        | 15                    |
| 0%                    | 50%                       | 100%                      | 100%                     | 100%      | 100%                     | 50%                   |

Non-Staff Inputs Key code:

- Consumables
- Drugs
- Equipment
- Other
- Pathology
- Custom

|                                |                                     |                  |                                                   |                            |                            |
|--------------------------------|-------------------------------------|------------------|---------------------------------------------------|----------------------------|----------------------------|
| Bandages/ plasters             | Cepheid Sample Collection Kit       | SMS Text message | HIV Serum test (4th Generation)                   | Letter notification (0.02) | Letter notification (0.05) |
| Blood tube                     | Sample Collection Instructions      |                  | Syphilis Immunosassy - Total antibody (IgG & IgM) | Phone call (0.03)          | Phone call (0.05)          |
| Cotton Wool                    | Urine Pot, sterile collection (0.7) |                  |                                                   | SMS Text message (0.95)    | SMS Text message (0.9)     |
| Gloves                         | Cepheid PoC CT/GC Test              |                  |                                                   |                            |                            |
| KY Lubricant (2)               |                                     |                  |                                                   |                            |                            |
| Lab Request form with bag      |                                     |                  |                                                   |                            |                            |
| Literature (STI) (3)           |                                     |                  |                                                   |                            |                            |
| Male Condom (10)               |                                     |                  |                                                   |                            |                            |
| Needle                         |                                     |                  |                                                   |                            |                            |
| Sterets/antiseptic wipe        |                                     |                  |                                                   |                            |                            |
| Syringe 10ml Luer Slip Syringe |                                     |                  |                                                   |                            |                            |
| Transport tube                 |                                     |                  |                                                   |                            |                            |
| Vacutainer                     |                                     |                  |                                                   |                            |                            |

POC1 sexual health screen for asymptomatic patients

PDF Options

| Staff                     | Total Primary Cost (£) | Total Additional Cost (£) |
|---------------------------|------------------------|---------------------------|
| Doctor/7/8                |                        |                           |
| Blend Nurse 7/8           | 0.08                   | 0.04                      |
| Blend all com SRH N2 - Dr | 10.55                  | 5.28                      |
| Blend HA                  | 0.08                   | 0.04                      |
| Blend Nurse 5/6/7/8       | 4.46                   | 4.46                      |
| Blend Nurse 5/6           | 8.25                   | 8.25                      |
| Admin/clerical            | 2.64                   | 0.00                      |
| <b>Total</b>              | <b>26.06</b>           | <b>18.07</b>              |
| Non-Staff                 | Total Primary Cost (£) | Total Additional Cost (£) |
| Consumables               | 4.08                   | 4.08                      |
| Drugs                     |                        |                           |
| Equipment                 |                        |                           |
| Other                     |                        |                           |
| Pathology                 | 47.28                  | 47.28                     |
| Custom                    |                        |                           |
| <b>Total</b>              | <b>51.36</b>           | <b>51.36</b>              |
| <b>Grand Total</b>        | <b>77.42</b>           | <b>69.43</b>              |

| Step Number | Step Name                 | Activity | Time (mins) | Type        | Name                                              | Cost (£) | Unit        | Quantity | Total Primary Cost (£) | Additional | Total Additional Cost (£) |
|-------------|---------------------------|----------|-------------|-------------|---------------------------------------------------|----------|-------------|----------|------------------------|------------|---------------------------|
| 1           | Register Meet + Greet     |          | 100%        | 5 Staff     | Admin/clerical                                    | £0.53    | Minute      | 100%     | £2.64                  | 0%         | £0.00                     |
| 2           | Blood Test + Consultation |          | 100%        | 10 Staff    | Blend all com SRH N2 - Dr                         | £1.06    | Minute      | 100%     | £10.55                 | 50%        | £5.28                     |
| 2           | Blood Test + Consultation |          | 100%        | Consumables | Bandages/ plasters                                | £0.07    | Item        | 1        | £0.07                  | 50%        | £0.07                     |
| 2           | Blood Test + Consultation |          | 100%        | Consumables | Blood tube                                        | £0.12    | Item        | 1        | £0.12                  | 50%        | £0.12                     |
| 2           | Blood Test + Consultation |          | 100%        | Consumables | Cotton Wool                                       | £0.01    | Item        | 1        | £0.01                  | 50%        | £0.01                     |
| 2           | Blood Test + Consultation |          | 100%        | Consumables | Gloves                                            | £0.05    | Pair        | 1        | £0.05                  | 50%        | £0.05                     |
| 2           | Blood Test + Consultation |          | 100%        | Consumables | KY Lubricant                                      | £0.30    | Application | 2        | £0.60                  | 50%        | £0.60                     |
| 2           | Blood Test + Consultation |          | 100%        | Consumables | Lab Request form with bag                         | £0.10    | Item        | 1        | £0.10                  | 50%        | £0.10                     |
| 2           | Blood Test + Consultation |          | 100%        | Consumables | Literature (STI)                                  | £0.06    | Item        | 3        | £0.18                  | 50%        | £0.18                     |
| 2           | Blood Test + Consultation |          | 100%        | Consumables | Male Condom                                       | £0.06    | Item        | 10       | £0.58                  | 50%        | £0.58                     |
| 2           | Blood Test + Consultation |          | 100%        | Consumables | Needle                                            | £0.03    | Item        | 1        | £0.03                  | 50%        | £0.03                     |
| 2           | Blood Test + Consultation |          | 100%        | Consumables | Sterets/antiseptic wipe                           | £0.02    | Item        | 1        | £0.02                  | 50%        | £0.02                     |
| 2           | Blood Test + Consultation |          | 100%        | Consumables | Syringe 10ml Luer Slip Syringe                    | £0.11    | Item        | 1        | £0.11                  | 50%        | £0.11                     |
| 2           | Blood Test + Consultation |          | 100%        | Consumables | Transport tube                                    | £0.26    | Item        | 1        | £0.26                  | 50%        | £0.26                     |
| 2           | Blood Test + Consultation |          | 100%        | Consumables | Vacutainer                                        | £0.02    | Item        | 1        | £0.02                  | 50%        | £0.02                     |
| 3           | PoC Test + Review Results |          | 100%        | 5 Staff     | Blend Nurse 5/6/7/8                               | £0.89    | Minute      | 100%     | £4.46                  | 100%       | £4.46                     |
| 3           | PoC Test + Review Results |          | 100%        | Consumables | Cepheid Sample Collection Kit                     | £1.50    | Item        | 1        | £1.50                  | 100%       | £1.50                     |
| 3           | PoC Test + Review Results |          | 100%        | Consumables | Sample Collection Instructions                    | £0.05    | Item        | 1        | £0.05                  | 100%       | £0.05                     |
| 3           | PoC Test + Review Results |          | 100%        | Consumables | Urine Pot, sterile collection                     | £0.23    | Item        | 0.7      | £0.16                  | 100%       | £0.16                     |
| 3           | PoC Test + Review Results |          | 100%        | Pathology   | Cepheid PoC CT/GC Test                            | £18.00   | Sample      | 1        | £18.00                 | 100%       | £18.00                    |
| 4           | Results Management (PoC)  |          | 100%        | 5 Staff     | Blend Nurse 5/6                                   | £0.75    | Minute      | 100%     | £3.75                  | 100%       | £3.75                     |
| 4           | Results Management (PoC)  |          | 100%        | Consumables | SMS Text message                                  | £0.10    | Item        | 1        | £0.10                  | 100%       | £0.10                     |
| 5           | Pathology                 |          | 100%        | Pathology   | HIV Serum test (4th Generation)                   | £12.78   | Sample      | 1        | £12.78                 | 100%       | £12.78                    |
| 5           | Pathology                 |          | 100%        | Pathology   | Syphilis Immunosassy - Total antibody (IgG & IgM) | £16.50   | Sample      | 1        | £16.50                 | 100%       | £16.50                    |
| 6           | Results Management (Lab)  |          | 100%        | 6 Staff     | Blend Nurse 5/6                                   | £0.75    | Minute      | 100%     | £4.50                  | 100%       | £4.50                     |
| 6           | Results Management (Lab)  |          | 100%        | Consumables | Letter notification                               | £0.58    | Item        | 0.02     | £0.01                  | 100%       | £0.01                     |
| 6           | Results Management (Lab)  |          | 100%        | Consumables | Phone call                                        | £0.07    | Minute      | 0.03     | £0.00                  | 100%       | £0.00                     |
| 6           | Results Management (Lab)  |          | 100%        | Consumables | SMS Text message                                  | £0.10    | Item        | 0.95     | £0.10                  | 100%       | £0.10                     |
| 7           | Contact Pos. + Equiv.     |          | 1%          | 15 Staff    | Blend Nurse 7/8                                   | £1.10    | Minute      | 50%      | £0.08                  | 50%        | £0.04                     |
| 7           | Contact Pos. + Equiv.     |          | 1%          | 15 Staff    | Blend HA                                          | £1.03    | Minute      | 50%      | £0.08                  | 50%        | £0.04                     |
| 7           | Contact Pos. + Equiv.     |          | 1%          | Consumables | Letter notification                               | £0.58    | Item        | 0.05     | £0.00                  | 50%        | £0.00                     |
| 7           | Contact Pos. + Equiv.     |          | 1%          | Consumables | Phone call                                        | £0.07    | Minute      | 0.05     | £0.00                  | 50%        | £0.00                     |
| 7           | Contact Pos. + Equiv.     |          | 1%          | Consumables | SMS Text message                                  | £0.10    | Item        | 0.9      | £0.00                  | 50%        | £0.00                     |

1  
2  
3  
4  
5  
6  
7  
8  
9  
10  
11  
12  
13  
14  
15  
16  
17  
18  
19  
20  
21  
22  
23  
24  
25  
26  
27  
28  
29  
30  
31  
32  
33  
34  
35  
36  
37  
38  
39  
40  
41  
42  
43  
44  
45  
46  
47

**PATHWAY**

Pathway Name: **POC2 sexual health screen for asymptomatic patients**

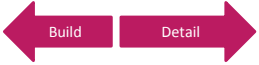

|                           | Step Number | Step Name | Activity | Primary Pathway Minutes | Additional Pathway Proportional |
|---------------------------|-------------|-----------|----------|-------------------------|---------------------------------|
| <b>Time (minutes)</b>     |             |           |          | <i>Primary Pathway</i>  | <i>Additional Pathway</i>       |
| <b>Total</b>              |             |           |          | <b>26.2</b>             | <b>16.1</b>                     |
| Doctor/7/8                |             |           |          |                         |                                 |
| Blend Nurse 7/8           |             |           |          | 0.1                     | 0.0                             |
| Blend all com SRH N2 - Dr |             |           |          | 10.0                    | 5.0                             |
| Blend HA                  |             |           |          | 0.1                     | 0.0                             |
| Blend Nurse 5/6/7/8       |             |           |          | 5.0                     | 5.0                             |
| Blend Nurse 5/6           |             |           |          | 6.0                     | 6.0                             |
| Admin/clerical            |             |           |          | 5.0                     |                                 |

| 1                     | 2                         | 3                      | 4          | 5         | 6                  | 7                     |
|-----------------------|---------------------------|------------------------|------------|-----------|--------------------|-----------------------|
| Register Meet + Greet | PoC Test + Review Results | Consultation + Results | Blood Work | Pathology | Results Management | Contact Pos. + Equiv. |
| 100%                  | 100%                      | 100%                   | 100%       | 100%      | 100%               | 1%                    |
| 5                     | 5                         | 5                      | 5          | 6         | 15                 | 15                    |
| 0%                    | 100%                      | 50%                    | 50%        | 100%      | 100%               | 50%                   |

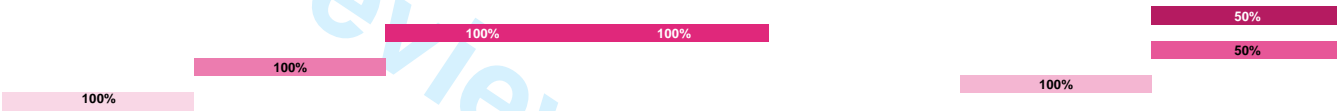

**Non-Staff Inputs Key code:**

- Consumables
- Drugs
- Equipment
- Other
- Pathology
- Custom

|                                     |                      |                                |                                                   |                            |                              |
|-------------------------------------|----------------------|--------------------------------|---------------------------------------------------|----------------------------|------------------------------|
| Cepheid Sample Collection Kit       | KY Lubricant (2)     | Bandages/ plasters             | HIV Serum test (4th Generation)                   | Letter notification (0.02) | Letter notification ( 0.05 ) |
| Sample Collection Instructions      | Literature (STI) (3) | Blood tube                     | Syphilis Immunossasy - Total antibody (IgG & IgM) | Phone call (0.03)          | Phone call ( 0.05 )          |
| Urine Pot, sterile collection (0.7) | Male Condom (10)     | Cotton Wool                    |                                                   | SMS Text message (0.95)    | SMS Text message ( 0.90 )    |
| Cepheid PoC CT/GC Test              |                      | Gloves                         |                                                   |                            |                              |
|                                     |                      | Lab Request form with bag      |                                                   |                            |                              |
|                                     |                      | Needle                         |                                                   |                            |                              |
|                                     |                      | Sterets/antiseptic wipe        |                                                   |                            |                              |
|                                     |                      | Syringe 10ml Luer Slip Syringe |                                                   |                            |                              |
|                                     |                      | Transport tube                 |                                                   |                            |                              |
|                                     |                      | Vacutainer                     |                                                   |                            |                              |

POC2 sexual health screen for asymptomatic patients

| Staff                     | Total Primary Cost (£) | Total Additional Cost (£) |
|---------------------------|------------------------|---------------------------|
| Doctor/7/8                |                        |                           |
| Blend Nurse 7/8           | 0.08                   | 0.04                      |
| Blend all com SRH N2 - Dr | 10.55                  | 5.28                      |
| Blend HA                  | 0.08                   | 0.04                      |
| Blend Nurse 5/6/7/8       | 4.46                   | 4.46                      |
| Blend Nurse 5/6           | 4.50                   | 4.50                      |
| Admin/clerical            | 2.64                   | 0.00                      |
| <b>Total</b>              | <b>22.31</b>           | <b>14.32</b>              |

  

| Non-Staff    | Total Primary Cost (£) | Total Additional Cost (£) |
|--------------|------------------------|---------------------------|
| Consumables  | 3.98                   | 3.98                      |
| Drugs        |                        |                           |
| Equipment    |                        |                           |
| Other        |                        |                           |
| Pathology    | 47.28                  | 47.28                     |
| Custom       |                        |                           |
| <b>Total</b> | <b>51.26</b>           | <b>51.26</b>              |

  

| Grand Total | Total Primary Cost (£) | Total Additional Cost (£) |
|-------------|------------------------|---------------------------|
|             | <b>73.57</b>           | <b>65.57</b>              |

PDF Options

For peer review only

| Step Number | Step Name                 | Activity | Time (mins) | Type        | Name                                              | Cost (£) | Unit        | Quantity | Total Primary Cost (£) | Additional | Total Additional Cost (£) |
|-------------|---------------------------|----------|-------------|-------------|---------------------------------------------------|----------|-------------|----------|------------------------|------------|---------------------------|
| 1           | Register Meet + Greet     |          | 100%        | 5 Staff     | Admin/clerical                                    | £0.53    | Minute      | 100%     | £2.64                  | 0%         | £0.00                     |
| 2           | PoC Test + Review Results |          | 100%        | 5 Staff     | Blend Nurse 5/6/7/8                               | £0.89    | Minute      | 100%     | £4.46                  | 100%       | £4.46                     |
| 2           | PoC Test + Review Results |          | 100%        | Consumables | Cepheid Sample Collection Kit                     | £1.50    | Item        | 1        | £1.50                  | 100%       | £1.50                     |
| 2           | PoC Test + Review Results |          | 100%        | Consumables | Sample Collection Instructions                    | £0.05    | Item        | 1        | £0.05                  | 100%       | £0.05                     |
| 2           | PoC Test + Review Results |          | 100%        | Consumables | Urine Pot, sterile collection                     | £0.23    | Item        | 0.7      | £0.16                  | 100%       | £0.16                     |
| 2           | PoC Test + Review Results |          | 100%        | Pathology   | Cepheid PoC CT/GC Test                            | £18.00   | Sample      | 1        | £18.00                 | 100%       | £18.00                    |
| 3           | Consultation + Results    |          | 100%        | 5 Staff     | Blend all com SRH N2 - Dr                         | £1.06    | Minute      | 100%     | £5.28                  | 50%        | £2.64                     |
| 3           | Consultation + Results    |          | 100%        | Consumables | KY Lubricant                                      | £0.30    | Application | 2        | £0.60                  | 50%        | £0.60                     |
| 3           | Consultation + Results    |          | 100%        | Consumables | Literature (STI)                                  | £0.06    | Item        | 3        | £0.18                  | 50%        | £0.18                     |
| 3           | Consultation + Results    |          | 100%        | Consumables | Male Condom                                       | £0.06    | Item        | 10       | £0.58                  | 50%        | £0.58                     |
| 4           | Blood Work                |          | 100%        | 5 Staff     | Blend all com SRH N2 - Dr                         | £1.06    | Minute      | 100%     | £5.28                  | 50%        | £2.64                     |
| 4           | Blood Work                |          | 100%        | Consumables | Bandages/ plasters                                | £0.07    | Item        | 1        | £0.07                  | 50%        | £0.07                     |
| 4           | Blood Work                |          | 100%        | Consumables | Blood tube                                        | £0.12    | Item        | 1        | £0.12                  | 50%        | £0.12                     |
| 4           | Blood Work                |          | 100%        | Consumables | Cotton Wool                                       | £0.01    | Item        | 1        | £0.01                  | 50%        | £0.01                     |
| 4           | Blood Work                |          | 100%        | Consumables | Gloves                                            | £0.05    | Pair        | 1        | £0.05                  | 50%        | £0.05                     |
| 4           | Blood Work                |          | 100%        | Consumables | Lab Request form with bag                         | £0.10    | Item        | 1        | £0.10                  | 50%        | £0.10                     |
| 4           | Blood Work                |          | 100%        | Consumables | Needle                                            | £0.03    | Item        | 1        | £0.03                  | 50%        | £0.03                     |
| 4           | Blood Work                |          | 100%        | Consumables | Sterets/antiseptic wipe                           | £0.02    | Item        | 1        | £0.02                  | 50%        | £0.02                     |
| 4           | Blood Work                |          | 100%        | Consumables | Syringe 10ml Luer Slip Syringe                    | £0.11    | Item        | 1        | £0.11                  | 50%        | £0.11                     |
| 4           | Blood Work                |          | 100%        | Consumables | Transport tube                                    | £0.26    | Item        | 1        | £0.26                  | 50%        | £0.26                     |
| 4           | Blood Work                |          | 100%        | Consumables | Vacutainer                                        | £0.02    | Item        | 1        | £0.02                  | 50%        | £0.02                     |
| 5           | Pathology                 |          | 100%        | Pathology   | HIV Serum test (4th Generation)                   | £12.78   | Sample      | 1        | £12.78                 | 100%       | £12.78                    |
| 5           | Pathology                 |          | 100%        | Pathology   | Syphilis Immunosassy - Total antibody (IgG & IgM) | £16.50   | Sample      | 1        | £16.50                 | 100%       | £16.50                    |
| 6           | Results Management        |          | 100%        | 6 Staff     | Blend Nurse 5/6                                   | £0.75    | Minute      | 100%     | £4.50                  | 100%       | £4.50                     |
| 6           | Results Management        |          | 100%        | Consumables | Letter notification                               | £0.58    | Item        | 0.02     | £0.01                  | 100%       | £0.01                     |
| 6           | Results Management        |          | 100%        | Consumables | Phone call                                        | £0.07    | Minute      | 0.03     | £0.00                  | 100%       | £0.00                     |
| 6           | Results Management        |          | 100%        | Consumables | SMS Text message                                  | £0.10    | Item        | 0.95     | £0.10                  | 100%       | £0.10                     |
| 7           | Contact Pos. + Equiv.     |          | 1%          | 15 Staff    | Blend Nurse 7/8                                   | £1.10    | Minute      | 50%      | £0.08                  | 50%        | £0.04                     |
| 7           | Contact Pos. + Equiv.     |          | 1%          | 15 Staff    | Blend HA                                          | £1.03    | Minute      | 50%      | £0.08                  | 50%        | £0.04                     |
| 7           | Contact Pos. + Equiv.     |          | 1%          | Consumables | Letter notification                               | £0.58    | Item        | 0.05     | £0.00                  | 50%        | £0.00                     |
| 7           | Contact Pos. + Equiv.     |          | 1%          | Consumables | Phone call                                        | £0.07    | Minute      | 0.05     | £0.00                  | 50%        | £0.00                     |
| 7           | Contact Pos. + Equiv.     |          | 1%          | Consumables | SMS Text message                                  | £0.10    | Item        | 0.9      | £0.00                  | 50%        | £0.00                     |





**DETAIL** Current sexual health screen for symptomatic patients

PDF Options

| Staff                     | Total Primary Cost (£) | Total Additional Cost (£) |
|---------------------------|------------------------|---------------------------|
| Doctor/7/8                | 14.54                  | 4.54                      |
| Blend Nurse 7/8           | 0.08                   | 0.04                      |
| Blend all com SRH N2 - Dr | 6.33                   | 0.00                      |
| Blend HA                  | 0.08                   | 0.04                      |
| Blend Nurse 5/6/7/8       |                        |                           |
| Blend Nurse 5/6           | 19.51                  | 14.35                     |
| Admin/clerical            | 2.64                   | 0.00                      |
| <b>Total</b>              | <b>43.17</b>           | <b>18.97</b>              |

  

| Non-Staff    | Total Primary Cost (£) | Total Additional Cost (£) |
|--------------|------------------------|---------------------------|
| Consumables  | 6.86                   | 5.51                      |
| Drugs        |                        |                           |
| Equipment    |                        |                           |
| Other        |                        |                           |
| Pathology    | 49.34                  | 49.34                     |
| Custom       |                        |                           |
| <b>Total</b> | <b>56.21</b>           | <b>54.85</b>              |

  

| Grand Total | Total Primary Cost (£) | Total Additional Cost (£) |
|-------------|------------------------|---------------------------|
|             | <b>99.38</b>           | <b>73.82</b>              |

For peer review only

| Step Number | Step Name                | Activity | Time (mins) | Type     | Name                      | Cost (£)                                          | Unit   | Quantity    | Total Primary Cost (£) | Additional | Total Additional Cost (£) |        |
|-------------|--------------------------|----------|-------------|----------|---------------------------|---------------------------------------------------|--------|-------------|------------------------|------------|---------------------------|--------|
| 1           | Register Meet + Greet    |          | 100%        | 5 Staff  | Admin/clerical            | £0.53                                             | Minute | 100%        | £2.64                  | 0%         | £0.00                     |        |
| 2           | Consultation             |          | 100%        | 15 Staff | Doctor/7/8                | £1.45                                             | Minute | 50%         | £10.91                 | 25%        | £2.73                     |        |
| 2           | Consultation             |          | 100%        | 15 Staff | Blend Nurse 5/6           | £0.75                                             | Minute | 50%         | £5.63                  | 25%        | £1.41                     |        |
| 3           | Examination & Blood Work |          | 100%        | 5 Staff  | Doctor/7/8                | £1.45                                             | Minute | 50%         | £3.64                  | 50%        | £1.82                     |        |
| 3           | Examination & Blood Work |          | 100%        | 5 Staff  | Blend Nurse 5/6           | £0.75                                             | Minute | 50%         | £1.88                  | 50%        | £0.94                     |        |
| 3           | Examination & Blood Work |          | 100%        |          | Consumables               | Bandages/ plasters                                | £0.07  | Item        | 1                      | £0.07      | 50%                       | £0.07  |
| 3           | Examination & Blood Work |          | 100%        |          | Consumables               | Blood tube                                        | £0.12  | Item        | 1                      | £0.12      | 50%                       | £0.12  |
| 3           | Examination & Blood Work |          | 100%        |          | Consumables               | Cotton Wool                                       | £0.01  | Item        | 1                      | £0.01      | 50%                       | £0.01  |
| 3           | Examination & Blood Work |          | 100%        |          | Consumables               | Culture plate                                     | £1.04  | Item        | 1                      | £1.04      | 50%                       | £1.04  |
| 3           | Examination & Blood Work |          | 100%        |          | Consumables               | Culture swab- GC                                  | £1.04  | Item        | 1                      | £1.04      | 50%                       | £1.04  |
| 3           | Examination & Blood Work |          | 100%        |          | Consumables               | Gloves                                            | £0.05  | Pair        | 2                      | £0.09      | 50%                       | £0.09  |
| 3           | Examination & Blood Work |          | 100%        |          | Consumables               | KY Lubricant                                      | £0.30  | Application | 1                      | £0.30      | 50%                       | £0.30  |
| 3           | Examination & Blood Work |          | 100%        |          | Consumables               | Lab Request form with bag                         | £0.10  | Item        | 1                      | £0.10      | 50%                       | £0.10  |
| 3           | Examination & Blood Work |          | 100%        |          | Consumables               | Needle                                            | £0.03  | Item        | 1                      | £0.03      | 50%                       | £0.03  |
| 3           | Examination & Blood Work |          | 100%        |          | Consumables               | Sample Collection Instructions                    | £0.05  | Item        | 1                      | £0.05      | 50%                       | £0.05  |
| 3           | Examination & Blood Work |          | 100%        |          | Consumables               | Speculum                                          | £0.82  | Item        | 0.5                    | £0.41      | 50%                       | £0.41  |
| 3           | Examination & Blood Work |          | 100%        |          | Consumables               | Sterets/antiseptic wipe                           | £0.02  | Item        | 1                      | £0.02      | 50%                       | £0.02  |
| 3           | Examination & Blood Work |          | 100%        |          | Consumables               | Swab                                              | £0.02  | Item        | 1                      | £0.02      | 50%                       | £0.02  |
| 3           | Examination & Blood Work |          | 100%        |          | Consumables               | Syringe 10ml Luer Slip Syringe                    | £0.11  | Item        | 1                      | £0.11      | 50%                       | £0.11  |
| 3           | Examination & Blood Work |          | 100%        |          | Consumables               | Transport tube                                    | £0.26  | Item        | 1                      | £0.26      | 50%                       | £0.26  |
| 3           | Examination & Blood Work |          | 100%        |          | Consumables               | Urine Pot, sterile collection                     | £0.23  | Item        | 0.5                    | £0.11      | 50%                       | £0.11  |
| 3           | Examination & Blood Work |          | 100%        |          | Consumables               | Urine Specimen Container (PCR Tube and Pipette)   | £1.04  | Item        | 0.5                    | £0.52      | 50%                       | £0.52  |
| 3           | Examination & Blood Work |          | 100%        |          | Consumables               | Vacutainer                                        | £0.02  | Item        | 1                      | £0.02      | 50%                       | £0.02  |
| 3           | Examination & Blood Work |          | 100%        |          | Consumables               | Vulvo-vaginal swab                                | £0.16  | Sample      | 0.5                    | £0.08      | 50%                       | £0.08  |
| 4           | Microscopy               |          | 100%        | 10 Staff | Blend Nurse 5/6           | £0.75                                             | Minute | 100%        | £7.50                  | 100%       | £7.50                     |        |
| 4           | Microscopy               |          | 100%        |          | Consumables               | Blotting paper                                    | £0.05  | Item        | 1                      | £0.05      | 100%                      | £0.05  |
| 4           | Microscopy               |          | 100%        |          | Consumables               | Gloves                                            | £0.05  | Pair        | 1                      | £0.05      | 100%                      | £0.05  |
| 4           | Microscopy               |          | 100%        |          | Consumables               | Gram Stain                                        | £0.20  | Procedure   | 1                      | £0.20      | 100%                      | £0.20  |
| 4           | Microscopy               |          | 100%        |          | Consumables               | Immersion oil                                     | £0.02  | Sample      | 1                      | £0.02      | 100%                      | £0.02  |
| 4           | Microscopy               |          | 100%        |          | Consumables               | Loops                                             | £0.60  | Item        | 1                      | £0.60      | 100%                      | £0.60  |
| 4           | Microscopy               |          | 100%        |          | Consumables               | Microscope slide (qty 1)                          | £0.07  | Item        | 1                      | £0.07      | 100%                      | £0.07  |
| 5           | Health Promotion         |          | 100%        | 6 Staff  | Blend all com SRH N2 - Dr | £1.06                                             | Minute | 100%        | £6.33                  | 0%         | £0.00                     |        |
| 5           | Health Promotion         |          | 100%        |          | Consumables               | KY Lubricant                                      | £0.30  | Application | 2                      | £0.60      | 0%                        | £0.00  |
| 5           | Health Promotion         |          | 100%        |          | Consumables               | Literature (STI)                                  | £0.06  | Item        | 3                      | £0.18      | 0%                        | £0.00  |
| 5           | Health Promotion         |          | 100%        |          | Consumables               | Male Condom                                       | £0.06  | Item        | 10                     | £0.58      | 0%                        | £0.00  |
| 6           | Pathology                |          | 100%        |          | Pathology                 | Chlamydia & Gonorrhoea NAAT                       | £12.51 | Sample      | 1                      | £12.51     | 100%                      | £12.51 |
| 6           | Pathology                |          | 100%        |          | Pathology                 | GC Culture/typing - lab processing                | £7.55  | Sample      | 1                      | £7.55      | 100%                      | £7.55  |
| 6           | Pathology                |          | 100%        |          | Pathology                 | HIV Serum test (4th Generation)                   | £12.78 | Sample      | 1                      | £12.78     | 100%                      | £12.78 |
| 6           | Pathology                |          | 100%        |          | Pathology                 | Syphilis Immunosassy - Total antibody (IgG & IgM) | £16.50 | Sample      | 1                      | £16.50     | 100%                      | £16.50 |
| 7           | Results Management       |          | 100%        | 6 Staff  | Blend Nurse 5/6           | £0.75                                             | Minute | 100%        | £4.50                  | 100%       | £4.50                     |        |
| 7           | Results Management       |          | 100%        |          | Consumables               | Letter notification                               | £0.58  | Item        | 0.02                   | £0.01      | 100%                      | £0.01  |
| 7           | Results Management       |          | 100%        |          | Consumables               | Phone call                                        | £0.07  | Minute      | 0.03                   | £0.00      | 100%                      | £0.00  |
| 7           | Results Management       |          | 100%        |          | Consumables               | SMS Text message                                  | £0.10  | Item        | 0.95                   | £0.10      | 100%                      | £0.10  |
| 8           | Contact Pos. + Equiv.    |          | 1%          | 15 Staff | Blend Nurse 7/8           | £1.10                                             | Minute | 50%         | £0.08                  | 50%        | £0.04                     |        |
| 8           | Contact Pos. + Equiv.    |          | 1%          | 15 Staff | Blend HA                  | £1.03                                             | Minute | 50%         | £0.08                  | 50%        | £0.04                     |        |
| 8           | Contact Pos. + Equiv.    |          | 1%          |          | Consumables               | Letter notification                               | £0.58  | Item        | 5%                     | £0.00      | 50%                       | £0.00  |
| 8           | Contact Pos. + Equiv.    |          | 1%          |          | Consumables               | Phone call                                        | £0.07  | Minute      | 5%                     | £0.00      | 50%                       | £0.00  |
| 8           | Contact Pos. + Equiv.    |          | 1%          |          | Consumables               | SMS Text message                                  | £0.10  | Item        | 90%                    | £0.00      | 50%                       | £0.00  |

1  
2  
3  
4  
5  
6  
7  
8  
9  
10  
11  
12  
13  
14  
15  
16  
17  
18  
19  
20  
21  
22  
23  
24  
25  
26  
27  
28  
29  
30  
31  
32  
33  
34  
35  
36  
37  
38  
39  
40  
41  
42  
43  
44  
45  
46  
47

**PATHWAY**

Pathway Name: POC1 sexual health screen for symptomatic patients

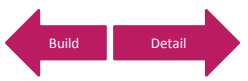

| Step Number              | Step Name | Activity | Primary Pathway Minutes | Additional Pathway Proportional |
|--------------------------|-----------|----------|-------------------------|---------------------------------|
| <b>Time (minutes)</b>    |           |          |                         |                                 |
|                          |           |          | Primary Pathway         | Additional Pathway              |
| <b>Total</b>             |           |          | 52.2                    | 27.3                            |
| Doctor 7/8               |           |          | 10.0                    | 3.1                             |
| Blend Nurse 7/8          |           |          | 0.1                     | 0.0                             |
| Blend all com SRH N2 - D |           |          |                         |                                 |
| Blend HA                 |           |          | 6.1                     | 0.0                             |
| Blend Nurse 5/6/7/8      |           |          | 5.0                     | 5.0                             |
| Blend Nurse 5/6          |           |          | 26.0                    | 19.1                            |
| Admin/clerical           |           |          | 5.0                     |                                 |

| 1                     | 2                 | 3                        | 4                         | 5                  | 6                | 7            | 8                  | 9                     |
|-----------------------|-------------------|--------------------------|---------------------------|--------------------|------------------|--------------|--------------------|-----------------------|
| Register Meet + Greet | Consultation      | Examination + Blood Work | PoC Test + Review Results | Microscopy         | Health Promotion | Pathology    | Results Management | Contact Pos. + Equiv. |
| 100%<br>5<br>0%       | 100%<br>15<br>25% | 100%<br>5<br>50%         | 100%<br>5<br>100%         | 100%<br>10<br>100% | 100%<br>6<br>0%  | 100%<br>100% | 100%<br>6<br>100%  | 1%<br>15<br>50%       |
|                       | 50%               |                          | 50%                       |                    |                  |              |                    | 50%                   |
|                       |                   |                          | 100%                      |                    | 100%             |              | 100%               |                       |
| 100%                  | 50%               | 50%                      |                           | 100%               |                  |              |                    |                       |

Non-Staff Inputs Key code:

- Consumables
- Drugs
- Equipment
- Other
- Pathology
- Custom

|                                |                                     |                          |                      |                                                    |                            |                            |
|--------------------------------|-------------------------------------|--------------------------|----------------------|----------------------------------------------------|----------------------------|----------------------------|
| Bandages/ plasters             | Cepheid Sample Collection Kit       | Blotting paper           | KY Lubricant (2)     | HIV Serum test (4th Generation)                    | Letter notification (0.02) | Letter notification (0.05) |
| Blood tube                     | Sample Collection Instructions      | Gloves                   | Literature (STI) (3) | Syphilis Immunossassy - Total antibody (IgG & IgM) | Phone call (0.03)          | Phone call (0.05)          |
| Cotton Wool                    | Urine Pot, sterile collection (0.5) | Gram Stain               | Male Condom (10)     |                                                    | SMS Text message (0.95)    | SMS Text message (0.9)     |
| Gloves                         | Cepheid PoC CT/GC Test              | Immersion oil            |                      |                                                    |                            |                            |
| KY Lubricant                   |                                     | Loops                    |                      |                                                    |                            |                            |
| Lab Request form with bag      |                                     | Microscope slide (qty 1) |                      |                                                    |                            |                            |
| Needle                         |                                     |                          |                      |                                                    |                            |                            |
| Speculum (0.5)                 |                                     |                          |                      |                                                    |                            |                            |
| Sterets/antiseptic wipe        |                                     |                          |                      |                                                    |                            |                            |
| Syringe 10ml Luer Slip Syringe |                                     |                          |                      |                                                    |                            |                            |
| Transport tube                 |                                     |                          |                      |                                                    |                            |                            |
| Vacutainer                     |                                     |                          |                      |                                                    |                            |                            |

POC1 sexual health screen for symptomatic patients

PDF Options

| Staff                     | Total Primary Cost (£) | Total Additional Cost (£) |
|---------------------------|------------------------|---------------------------|
| Doctor/7/8                | 14.54                  | 4.54                      |
| Blend Nurse 7/8           | 0.08                   | 0.04                      |
| Blend all com SRH N2 - Dr |                        |                           |
| Blend HA                  | 6.26                   | 0.04                      |
| Blend Nurse 5/6/7/8       | 4.46                   | 4.46                      |
| Blend Nurse 5/6           | 19.51                  | 14.35                     |
| Admin/clerical            | 2.64                   | 0.00                      |
| <b>Total</b>              | <b>47.48</b>           | <b>23.43</b>              |

  

| Non-Staff    | Total Primary Cost (£) | Total Additional Cost (£) |
|--------------|------------------------|---------------------------|
| Consumables  | 5.63                   | 4.27                      |
| Drugs        |                        |                           |
| Equipment    |                        |                           |
| Other        |                        |                           |
| Pathology    | 47.28                  | 47.28                     |
| Custom       |                        |                           |
| <b>Total</b> | <b>52.91</b>           | <b>51.55</b>              |

  

| Grand Total | Total Primary Cost (£) | Total Additional Cost (£) |
|-------------|------------------------|---------------------------|
|             | <b>100.39</b>          | <b>74.98</b>              |

| Step Number | Step Name                 | Activity | Time (mins) | Type        | Name                                              | Cost (£) | Unit        | Quantity | Total Primary Cost (£) | Additional | Total Additional Cost (£) |
|-------------|---------------------------|----------|-------------|-------------|---------------------------------------------------|----------|-------------|----------|------------------------|------------|---------------------------|
| 1           | Register Meet + Greet     |          | 100%        | 5 Staff     | Admin/clerical                                    | £0.53    | Minute      | 100%     | £2.64                  | 0%         | £0.00                     |
| 2           | Consultation              |          | 100%        | 15 Staff    | Doctor/7/8                                        | £1.45    | Minute      | 50%      | £10.91                 | 25%        | £2.73                     |
| 2           | Consultation              |          | 100%        | 15 Staff    | Blend Nurse 5/6                                   | £0.75    | Minute      | 50%      | £5.63                  | 25%        | £1.41                     |
| 3           | Examination + Blood Work  |          | 100%        | 5 Staff     | Doctor/7/8                                        | £1.45    | Minute      | 50%      | £3.64                  | 50%        | £1.82                     |
| 3           | Examination + Blood Work  |          | 100%        | 5 Staff     | Blend Nurse 5/6                                   | £0.75    | Minute      | 50%      | £1.88                  | 50%        | £0.94                     |
| 3           | Examination + Blood Work  |          | 100%        | Consumables | Bandages/ plasters                                | £0.07    | Item        | 1        | £0.07                  | 50%        | £0.04                     |
| 3           | Examination + Blood Work  |          | 100%        | Consumables | Blood tube                                        | £0.12    | Item        | 1        | £0.12                  | 50%        | £0.06                     |
| 3           | Examination + Blood Work  |          | 100%        | Consumables | Cotton Wool                                       | £0.01    | Item        | 1        | £0.01                  | 50%        | £0.01                     |
| 3           | Examination + Blood Work  |          | 100%        | Consumables | Gloves                                            | £0.05    | Pair        | 1        | £0.05                  | 50%        | £0.03                     |
| 3           | Examination + Blood Work  |          | 100%        | Consumables | KY Lubricant                                      | £0.30    | Application | 1        | £0.30                  | 50%        | £0.15                     |
| 3           | Examination + Blood Work  |          | 100%        | Consumables | Lab Request form with bag                         | £0.10    | Item        | 1        | £0.10                  | 50%        | £0.05                     |
| 3           | Examination + Blood Work  |          | 100%        | Consumables | Needle                                            | £0.03    | Item        | 1        | £0.03                  | 50%        | £0.02                     |
| 3           | Examination + Blood Work  |          | 100%        | Consumables | Speculum                                          | £0.82    | Item        | 0.5      | £0.41                  | 50%        | £0.21                     |
| 3           | Examination + Blood Work  |          | 100%        | Consumables | Sterets/antiseptic wipe                           | £0.02    | Item        | 1        | £0.02                  | 50%        | £0.01                     |
| 3           | Examination + Blood Work  |          | 100%        | Consumables | Syringe 10ml Luer Slip Syringe                    | £0.11    | Item        | 1        | £0.11                  | 50%        | £0.06                     |
| 3           | Examination + Blood Work  |          | 100%        | Consumables | Transport tube                                    | £0.26    | Item        | 1        | £0.26                  | 50%        | £0.13                     |
| 3           | Examination + Blood Work  |          | 100%        | Consumables | Vacutainer                                        | £0.02    | Item        | 1        | £0.02                  | 50%        | £0.01                     |
| 4           | PoC Test + Review Results |          | 100%        | 5 Staff     | Blend Nurse 5/6/7/8                               | £0.89    | Minute      | 100%     | £4.46                  | 100%       | £4.46                     |
| 4           | PoC Test + Review Results |          | 100%        | Consumables | Cepheid Sample Collection Kit                     | £1.50    | Item        | 1        | £1.50                  | 100%       | £1.50                     |
| 4           | PoC Test + Review Results |          | 100%        | Consumables | Sample Collection Instructions                    | £0.05    | Item        | 1        | £0.05                  | 100%       | £0.05                     |
| 4           | PoC Test + Review Results |          | 100%        | Consumables | Urine Pot, sterile collection                     | £0.23    | Item        | 0.5      | £0.11                  | 100%       | £0.11                     |
| 4           | PoC Test + Review Results |          | 100%        | Pathology   | Cepheid PoC CT/GC Test                            | £18.00   | Sample      | 1        | £18.00                 | 100%       | £18.00                    |
| 5           | Microscopy                |          | 100%        | 10 Staff    | Blend Nurse 5/6                                   | £0.75    | Minute      | 100%     | £7.50                  | 100%       | £7.50                     |
| 5           | Microscopy                |          | 100%        | Consumables | Blotting paper                                    | £0.05    | Item        | 1        | £0.05                  | 100%       | £0.05                     |
| 5           | Microscopy                |          | 100%        | Consumables | Gloves                                            | £0.05    | Pair        | 1        | £0.05                  | 100%       | £0.05                     |
| 5           | Microscopy                |          | 100%        | Consumables | Gram Stain                                        | £0.20    | Procedure   | 1        | £0.20                  | 100%       | £0.20                     |
| 5           | Microscopy                |          | 100%        | Consumables | Immersion oil                                     | £0.02    | Sample      | 1        | £0.02                  | 100%       | £0.02                     |
| 5           | Microscopy                |          | 100%        | Consumables | Loops                                             | £0.60    | Item        | 1        | £0.60                  | 100%       | £0.60                     |
| 5           | Microscopy                |          | 100%        | Consumables | Microscope slide (qty 1)                          | £0.07    | Item        | 1        | £0.07                  | 100%       | £0.07                     |
| 6           | Health Promotion          |          | 100%        | 6 Staff     | Blend HA                                          | £1.03    | Minute      | 100%     | £6.18                  | 0%         | £0.00                     |
| 6           | Health Promotion          |          | 100%        | Consumables | KY Lubricant                                      | £0.30    | Application | 2        | £0.60                  | 0%         | £0.00                     |
| 6           | Health Promotion          |          | 100%        | Consumables | Literature (STI)                                  | £0.06    | Item        | 3        | £0.18                  | 0%         | £0.00                     |
| 6           | Health Promotion          |          | 100%        | Consumables | Male Condom                                       | £0.06    | Item        | 10       | £0.58                  | 0%         | £0.00                     |
| 7           | Pathology                 |          | 100%        | Pathology   | HIV Serum test (4th Generation)                   | £12.78   | Sample      | 1        | £12.78                 | 100%       | £12.78                    |
| 7           | Pathology                 |          | 100%        | Pathology   | Syphilis Immunosassy - Total antibody (IgG & IgM) | £16.50   | Sample      | 1        | £16.50                 | 100%       | £16.50                    |
| 8           | Results Management        |          | 100%        | 6 Staff     | Blend Nurse 5/6                                   | £0.75    | Minute      | 100%     | £4.50                  | 100%       | £4.50                     |
| 8           | Results Management        |          | 100%        | Consumables | Letter notification                               | £0.58    | Item        | 0.02     | £0.01                  | 100%       | £0.01                     |
| 8           | Results Management        |          | 100%        | Consumables | Phone call                                        | £0.07    | Minute      | 0.03     | £0.00                  | 100%       | £0.00                     |
| 8           | Results Management        |          | 100%        | Consumables | SMS Text message                                  | £0.10    | Item        | 0.95     | £0.10                  | 100%       | £0.10                     |
| 9           | Contact Pos. + Equiv.     |          | 1%          | 15 Staff    | Blend Nurse 7/8                                   | £1.10    | Minute      | 50%      | £0.08                  | 50%        | £0.04                     |
| 9           | Contact Pos. + Equiv.     |          | 1%          | 15 Staff    | Blend HA                                          | £1.03    | Minute      | 50%      | £0.08                  | 50%        | £0.04                     |
| 9           | Contact Pos. + Equiv.     |          | 1%          | Consumables | Letter notification                               | £0.58    | Item        | 5%       | £0.00                  | 50%        | £0.00                     |
| 9           | Contact Pos. + Equiv.     |          | 1%          | Consumables | Phone call                                        | £0.07    | Minute      | 5%       | £0.00                  | 50%        | £0.00                     |
| 9           | Contact Pos. + Equiv.     |          | 1%          | Consumables | SMS Text message                                  | £0.10    | Item        | 90%      | £0.00                  | 50%        | £0.00                     |

1  
2  
3  
4  
5  
6  
7  
8  
9  
10  
11  
12  
13  
14  
15  
16  
17  
18  
19  
20  
21  
22  
23  
24  
25  
26  
27  
28  
29  
30  
31  
32  
33  
34  
35  
36  
37  
38  
39  
40  
41  
42  
43  
44  
45  
46  
47

**PATHWAY**

Pathway Name: POC2 sexual health screen for symptomatic patients

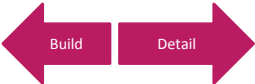

| Step Number                     | Step Name                 | Activity | Primary Pathway Minutes | Additional Pathway Proportional |
|---------------------------------|---------------------------|----------|-------------------------|---------------------------------|
| <b>Total</b>                    |                           |          |                         |                                 |
| Primary Pathway                 |                           |          | 36.2                    |                                 |
| Additional Pathway Proportional |                           |          |                         | 21.1                            |
| 1                               | Register Meet + Greet     |          | 5                       | 0%                              |
| 2                               | PoC Test + Review Results |          | 5                       | 100%                            |
| 3                               | Consultation              |          | 10                      | 25%                             |
| 4                               | Examination + Blood tests |          | 5                       | 50%                             |
| 5                               | Microscopy                |          | 10                      | 100%                            |
| 6                               | Pathology                 |          |                         |                                 |
| 7                               | Results Management        |          | 6                       | 100%                            |
| 8                               | Contact Pos. + Equiv.     |          | 15                      | 50%                             |

| Step Number | Step Name                 | 100% | 50%  | 100% | 100% | 100% | 100% | 1%  |
|-------------|---------------------------|------|------|------|------|------|------|-----|
| 1           | Register Meet + Greet     | 100% |      |      |      |      |      |     |
| 2           | PoC Test + Review Results |      | 100% |      |      |      |      |     |
| 3           | Consultation              |      |      | 50%  |      |      |      |     |
| 4           | Examination + Blood tests |      |      | 50%  |      |      |      |     |
| 5           | Microscopy                |      |      |      | 100% |      |      |     |
| 6           | Pathology                 |      |      |      |      | 100% |      |     |
| 7           | Results Management        |      |      |      |      |      | 100% |     |
| 8           | Contact Pos. + Equiv.     |      |      |      |      |      |      | 50% |

Non-Staff Inputs Key code:

- Consumables
- Drugs
- Equipment
- Other
- Pathology
- Custom

| Step | Step Name                 | Consumables                         | Drugs                | Equipment                 | Other                    | Pathology                                          | Custom                     |
|------|---------------------------|-------------------------------------|----------------------|---------------------------|--------------------------|----------------------------------------------------|----------------------------|
| 3    | Consultation              | Cepheid Sample Collection Kit       | KY Lubricant (2)     | Bandages/ plasters        | Blotting paper           | HIV Serum test (4th Generation)                    | Letter notification (0.02) |
| 4    | Examination + Blood tests | Sample Collection Instructions      | Literature (STI) (3) | Blood tube                | Gloves                   | Syphilis Immunossassy - Total antibody (IgG & IgM) | Letter notification (0.05) |
| 5    | Microscopy                | Urine Pot, sterile collection (0.5) | Male Condom (10)     | Cotton Wool               | Gram Stain               |                                                    | Phone call (0.03)          |
| 6    | Pathology                 | Cepheid PoC CT/GC Test              |                      | Gloves                    | Immersion oil            |                                                    | Phone call (0.05)          |
| 7    | Results Management        |                                     |                      | KY Lubricant              | Loops                    |                                                    | SMS Text message (0.95)    |
| 8    | Contact Pos. + Equiv.     |                                     |                      | Lab Request form with bag | Microscope slide (qty 1) |                                                    | SMS Text message (0.9)     |

POC2 sexual health screen for symptomatic patients

| Staff                     | Total Primary Cost (£) | Total Additional Cost (£) |
|---------------------------|------------------------|---------------------------|
| Doctor/7/8                | 10.91                  | 3.64                      |
| Blend Nurse 7/8           | 0.08                   | 0.04                      |
| Blend all com SRH N2 - Dr |                        |                           |
| Blend HA                  | 0.08                   | 0.04                      |
| Blend Nurse 5/6/7/8       | 4.46                   | 4.46                      |
| Blend Nurse 5/6           | 13.88                  | 10.13                     |
| Admin/clerical            | 2.64                   | 0.00                      |
| <b>Total</b>              | <b>32.04</b>           | <b>18.30</b>              |
| Non-Staff                 | Total Primary Cost (£) | Total Additional Cost (£) |
| Consumables               | 5.14                   | 5.14                      |
| Drugs                     |                        |                           |
| Equipment                 |                        |                           |
| Other                     |                        |                           |
| Pathology                 | 47.28                  | 47.28                     |
| Custom                    |                        |                           |
| <b>Total</b>              | <b>52.42</b>           | <b>52.42</b>              |
| <b>Grand Total</b>        | <b>84.46</b>           | <b>70.72</b>              |

PDF Options

For peer review only

| Step Number | Step Name                 | Activity | Time (mins) | Type        | Name                                              | Cost (£) | Unit        | Quantity | Total Primary Cost (£) | Additional | Total Additional Cost (£) |
|-------------|---------------------------|----------|-------------|-------------|---------------------------------------------------|----------|-------------|----------|------------------------|------------|---------------------------|
| 1           | Register Meet + Greet     |          | 100%        | 5 Staff     | Admin/clerical                                    | £0.53    | Minute      | 100%     | £2.64                  | 0%         | £0.00                     |
| 2           | PoC Test + Review Results |          | 100%        | 5 Staff     | Blend Nurse 5/6/7/8                               | £0.89    | Minute      | 100%     | £4.46                  | 100%       | £4.46                     |
| 2           | PoC Test + Review Results |          | 100%        | Consumables | Cepheid Sample Collection Kit                     | £1.50    | Item        | 1        | £1.50                  | 100%       | £1.50                     |
| 2           | PoC Test + Review Results |          | 100%        | Consumables | Sample Collection Instructions                    | £0.05    | Item        | 1        | £0.05                  | 100%       | £0.05                     |
| 2           | PoC Test + Review Results |          | 100%        | Consumables | Urine Pot, sterile collection                     | £0.23    | Item        | 0.5      | £0.11                  | 100%       | £0.11                     |
| 2           | PoC Test + Review Results |          | 100%        | Pathology   | Cepheid PoC CT/GC Test                            | £18.00   | Sample      | 1        | £18.00                 | 100%       | £18.00                    |
| 3           | Consultation              |          | 100%        | 10 Staff    | Doctor/7/8                                        | £1.45    | Minute      | 50%      | £7.27                  | 25%        | £1.82                     |
| 3           | Consultation              |          | 100%        | 10 Staff    | Blend Nurse 5/6                                   | £0.75    | Minute      | 50%      | £3.75                  | 25%        | £0.94                     |
| 3           | Consultation              |          | 100%        | Consumables | KY Lubricant                                      | £0.30    | Application | 2        | £0.60                  | 25%        | £0.60                     |
| 3           | Consultation              |          | 100%        | Consumables | Literature (STI)                                  | £0.06    | Item        | 3        | £0.18                  | 25%        | £0.18                     |
| 3           | Consultation              |          | 100%        | Consumables | Male Condom                                       | £0.06    | Item        | 10       | £0.58                  | 25%        | £0.58                     |
| 4           | Examination + Blood tests |          | 100%        | 5 Staff     | Doctor/7/8                                        | £1.45    | Minute      | 50%      | £3.64                  | 50%        | £1.82                     |
| 4           | Examination + Blood tests |          | 100%        | 5 Staff     | Blend Nurse 5/6                                   | £0.75    | Minute      | 50%      | £1.88                  | 50%        | £0.94                     |
| 4           | Examination + Blood tests |          | 100%        | Consumables | Bandages/ plasters                                | £0.07    | Item        | 1        | £0.07                  | 50%        | £0.07                     |
| 4           | Examination + Blood tests |          | 100%        | Consumables | Blood tube                                        | £0.12    | Item        | 1        | £0.12                  | 50%        | £0.12                     |
| 4           | Examination + Blood tests |          | 100%        | Consumables | Cotton Wool                                       | £0.01    | Item        | 1        | £0.01                  | 50%        | £0.01                     |
| 4           | Examination + Blood tests |          | 100%        | Consumables | Gloves                                            | £0.05    | Pair        | 1        | £0.05                  | 50%        | £0.05                     |
| 4           | Examination + Blood tests |          | 100%        | Consumables | KY Lubricant                                      | £0.30    | Application | 1        | £0.30                  | 50%        | £0.30                     |
| 4           | Examination + Blood tests |          | 100%        | Consumables | Lab Request form with bag                         | £0.10    | Item        | 1        | £0.10                  | 50%        | £0.10                     |
| 4           | Examination + Blood tests |          | 100%        | Consumables | Needle                                            | £0.03    | Item        | 1        | £0.03                  | 50%        | £0.03                     |
| 4           | Examination + Blood tests |          | 100%        | Consumables | Speculum                                          | £0.82    | Item        | 0.5      | £0.41                  | 50%        | £0.41                     |
| 4           | Examination + Blood tests |          | 100%        | Consumables | Sterets/antiseptic wipe                           | £0.02    | Item        | 1        | £0.02                  | 50%        | £0.02                     |
| 4           | Examination + Blood tests |          | 100%        | Consumables | Syringe 10ml Luer Slip Syringe                    | £0.11    | Item        | 1        | £0.11                  | 50%        | £0.11                     |
| 4           | Examination + Blood tests |          | 100%        | Consumables | Transport tube                                    | £0.26    | Item        | 1        | £0.26                  | 50%        | £0.26                     |
| 4           | Examination + Blood tests |          | 100%        | Consumables | Vacutainer                                        | £0.02    | Item        | 1        | £0.02                  | 50%        | £0.02                     |
| 5           | Microscopy                |          | 50%         | 10 Staff    | Blend Nurse 5/6                                   | £0.75    | Minute      | 100%     | £3.75                  | 100%       | £3.75                     |
| 5           | Microscopy                |          | 50%         | Consumables | Blotting paper                                    | £0.05    | Item        | 1        | £0.03                  | 100%       | £0.03                     |
| 5           | Microscopy                |          | 50%         | Consumables | Gloves                                            | £0.05    | Pair        | 1        | £0.02                  | 100%       | £0.02                     |
| 5           | Microscopy                |          | 50%         | Consumables | Gram Stain                                        | £0.20    | Procedure   | 1        | £0.10                  | 100%       | £0.10                     |
| 5           | Microscopy                |          | 50%         | Consumables | Immersion oil                                     | £0.02    | Sample      | 1        | £0.01                  | 100%       | £0.01                     |
| 5           | Microscopy                |          | 50%         | Consumables | Loops                                             | £0.60    | Item        | 1        | £0.30                  | 100%       | £0.30                     |
| 5           | Microscopy                |          | 50%         | Consumables | Microscope slide (qty 1)                          | £0.07    | Item        | 1        | £0.04                  | 100%       | £0.04                     |
| 6           | Pathology                 |          | 100%        | Pathology   | HIV Serum test (4th Generation)                   | 12.78    | Sample      | 1        | £12.78                 | 100%       | £12.78                    |
| 6           | Pathology                 |          | 100%        | Pathology   | Syphilis Immunosassy - Total antibody (IgG & IgM) | £16.50   | Sample      | 1        | £16.50                 | 100%       | £16.50                    |
| 7           | Results Management        |          | 100%        | 6 Staff     | Blend Nurse 5/6                                   | £0.75    | Minute      | 100%     | £4.50                  | 100%       | £4.50                     |
| 7           | Results Management        |          | 100%        | Consumables | Letter notification                               | £0.58    | Item        | 0.02     | £0.01                  | 100%       | £0.01                     |
| 7           | Results Management        |          | 100%        | Consumables | Phone call                                        | £0.07    | Minute      | 0.03     | £0.00                  | 100%       | £0.00                     |
| 7           | Results Management        |          | 100%        | Consumables | SMS Text message                                  | £0.10    | Item        | 0.95     | £0.10                  | 100%       | £0.10                     |
| 8           | Contact Pos. + Equiv.     |          | 1%          | 15 Staff    | Blend Nurse 7/8                                   | £1.10    | Minute      | 50%      | £0.08                  | 50%        | £0.04                     |
| 8           | Contact Pos. + Equiv.     |          | 1%          | 15 Staff    | Blend HA                                          | £1.03    | Minute      | 50%      | £0.08                  | 50%        | £0.04                     |
| 8           | Contact Pos. + Equiv.     |          | 1%          | Consumables | Letter notification                               | £0.58    | Item        | 0.05     | £0.00                  | 50%        | £0.00                     |
| 8           | Contact Pos. + Equiv.     |          | 1%          | Consumables | Phone call                                        | £0.07    | Minute      | 0.05     | £0.00                  | 50%        | £0.00                     |
| 8           | Contact Pos. + Equiv.     |          | 1%          | Consumables | SMS Text message                                  | £0.10    | Item        | 0.9      | £0.00                  | 50%        | £0.00                     |

**PATHWAY**

Pathway Name: **Rapid sexual health screening for asymptomatic patients**

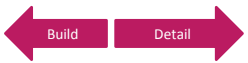

|                          | Step Number | Step Name | Activity | Primary Pathway Minutes | Additional Pathway Proportional |
|--------------------------|-------------|-----------|----------|-------------------------|---------------------------------|
| <b>Time (minutes)</b>    |             |           |          | <i>Primary Pathway</i>  | <i>Additional Pathway</i>       |
| <b>Total</b>             |             |           |          | <b>21.2</b>             | <b>11.1</b>                     |
| Doctor/7/8               |             |           |          |                         |                                 |
| Blend Nurse 7/8          |             |           |          | 0.1                     | 0.0                             |
| Blend all com SRH N2 - D |             |           |          | 10.0                    | 5.0                             |
| Blend HA                 |             |           |          | 0.1                     | 0.0                             |
| Blend Nurse 5/6/7/8      |             |           |          |                         |                                 |
| Blend Nurse 5/6          |             |           |          | 6.0                     | 6.0                             |
| Admin/clerical           |             |           |          | 5.0                     |                                 |

|  | 1                     | 2                         | 3         | 4                  | 5                     |
|--|-----------------------|---------------------------|-----------|--------------------|-----------------------|
|  | Register Meet + Greet | Blood Test + Consultation | Pathology | Results Management | Contact Pos. + Equiv. |
|  | 100%                  | 100%                      | 100%      | 100%               | 1%                    |
|  | 5                     | 10                        |           | 6                  | 15                    |
|  | 0%                    | 50%                       | 100%      | 100%               | 50%                   |

Non-Staff Inputs Key code:

|             |
|-------------|
| Consumables |
| Drugs       |
| Equipment   |
| Other       |
| Pathology   |
| Custom      |

|                                     |                                                   |                            |                            |
|-------------------------------------|---------------------------------------------------|----------------------------|----------------------------|
| Bandages/ plasters                  | Chlamydia & Gonorrhoea NAAT                       | Letter notification (0.02) | Letter notification (0.05) |
| Blood tube                          | HIV Serum test (4th Generation)                   | Phone call (0.03)          | Phone Call (0.05)          |
| Cotton Wool                         | Syphilis Immunosassy - Total antibody (IgG & IgM) | SMS Text message (0.95)    | SMS Text message (0.9)     |
| Gloves                              |                                                   |                            |                            |
| KY Lubricant (2)                    |                                                   |                            |                            |
| Lab Request form with bag           |                                                   |                            |                            |
| Literature (STI) (3)                |                                                   |                            |                            |
| Male Condom (10)                    |                                                   |                            |                            |
| Needle                              |                                                   |                            |                            |
| Sample Collection Instructions      |                                                   |                            |                            |
| Sterets/antiseptic wipe             |                                                   |                            |                            |
| Syringe 10ml Luer Slip Syringe      |                                                   |                            |                            |
| Transport tube                      |                                                   |                            |                            |
| Urine Pot, sterile collection (0.7) |                                                   |                            |                            |
| Vacutainer                          |                                                   |                            |                            |
| Vulvo-vaginal swab (0.3)            |                                                   |                            |                            |

1  
2  
3  
4  
5  
6  
7  
8  
9  
10  
11  
12  
13  
14  
15  
16  
17  
18  
19  
20  
21  
22  
23  
24  
25  
26  
27  
28  
29  
30  
31  
32  
33  
34  
35  
36  
37  
38  
39  
40  
41  
42  
43  
44  
45  
46  
47

Rapid sexual health screening for asymptomatic patients

PDF Options

| Staff                     | Total Primary Cost (£) | Total Additional Cost (£) |
|---------------------------|------------------------|---------------------------|
| Doctor/7/8                |                        | 0.04                      |
| Blend Nurse 7/8           | 10.55                  | 5.28                      |
| Blend all com SRH N2 - Dr | 0.08                   | 0.04                      |
| Blend HA                  |                        | 0.04                      |
| Blend Nurse 5/6/7/8       | 4.50                   | 4.50                      |
| Blend Nurse 5/6           | 2.64                   | 0.00                      |
| Admin/clerical            |                        |                           |
| <b>Total</b>              | <b>17.85</b>           | <b>9.86</b>               |
| Non-Staff                 | Total Primary Cost (£) | Total Additional Cost (£) |
| Consumables               | 2.53                   | 2.53                      |
| Drugs                     |                        |                           |
| Equipment                 |                        |                           |
| Other                     |                        |                           |
| Pathology                 | 41.79                  | 41.79                     |
| Custom                    |                        |                           |
| <b>Total</b>              | <b>44.32</b>           | <b>44.32</b>              |
| <b>Grand Total</b>        | <b>62.16</b>           | <b>54.17</b>              |

| Step Number | Step Name                 | Activity | Time (mins) | Type        | Name                                               | Cost (£) | Unit        | Quantity | Total Primary Cost (£) | Additional | Total Additional Cost (£) |
|-------------|---------------------------|----------|-------------|-------------|----------------------------------------------------|----------|-------------|----------|------------------------|------------|---------------------------|
| 1           | Register Meet + Greet     |          | 100%        | 5 Staff     | Admin/clerical                                     | £0.53    | Minute      | 100%     | £2.64                  | 0%         | £0.00                     |
| 2           | Blood Test + Consultation |          | 100%        | 10 Staff    | Blend all com SRH N2 - Dr                          | £1.06    | Minute      | 100%     | £10.55                 | 50%        | £5.28                     |
| 2           | Blood Test + Consultation |          | 100%        | Consumables | Bandages/ plasters                                 | £0.07    | Item        | 1        | £0.07                  | 50%        | £0.07                     |
| 2           | Blood Test + Consultation |          | 100%        | Consumables | Blood tube                                         | £0.12    | Item        | 1        | £0.12                  | 50%        | £0.12                     |
| 2           | Blood Test + Consultation |          | 100%        | Consumables | Cotton Wool                                        | £0.01    | Item        | 1        | £0.01                  | 50%        | £0.01                     |
| 2           | Blood Test + Consultation |          | 100%        | Consumables | Gloves                                             | £0.05    | Pair        | 1        | £0.05                  | 50%        | £0.05                     |
| 2           | Blood Test + Consultation |          | 100%        | Consumables | KY Lubricant                                       | £0.30    | Application | 2        | £0.60                  | 50%        | £0.60                     |
| 2           | Blood Test + Consultation |          | 100%        | Consumables | Lab Request form with bag                          | £0.10    | Item        | 1        | £0.10                  | 50%        | £0.10                     |
| 2           | Blood Test + Consultation |          | 100%        | Consumables | Literature (STI)                                   | £0.06    | Item        | 3        | £0.18                  | 50%        | £0.18                     |
| 2           | Blood Test + Consultation |          | 100%        | Consumables | Male Condom                                        | £0.06    | Item        | 10       | £0.58                  | 50%        | £0.58                     |
| 2           | Blood Test + Consultation |          | 100%        | Consumables | Needle                                             | £0.03    | Item        | 1        | £0.03                  | 50%        | £0.03                     |
| 2           | Blood Test + Consultation |          | 100%        | Consumables | Sample Collection Instructions                     | £0.05    | Item        | 1        | £0.05                  | 50%        | £0.05                     |
| 2           | Blood Test + Consultation |          | 100%        | Consumables | Sterets/antiseptic wipe                            | £0.02    | Item        | 1        | £0.02                  | 50%        | £0.02                     |
| 2           | Blood Test + Consultation |          | 100%        | Consumables | Syringe 10ml Luer Slip Syringe                     | £0.11    | Item        | 1        | £0.11                  | 50%        | £0.11                     |
| 2           | Blood Test + Consultation |          | 100%        | Consumables | Transport tube                                     | £0.26    | Item        | 1        | £0.26                  | 50%        | £0.26                     |
| 2           | Blood Test + Consultation |          | 100%        | Consumables | Urine Pot, sterile collection                      | £0.23    | Item        | 0.7      | £0.16                  | 50%        | £0.16                     |
| 2           | Blood Test + Consultation |          | 100%        | Consumables | Vacutainer                                         | £0.02    | Item        | 1        | £0.02                  | 50%        | £0.02                     |
| 2           | Blood Test + Consultation |          | 100%        | Consumables | Vulvo-vaginal swab                                 | £0.16    | Sample      | 0.3      | £0.05                  | 50%        | £0.05                     |
| 3           | Pathology                 |          | 100%        | Pathology   | Chlamydia & Gonorrhoea NAAT                        | £12.51   | Sample      | 1        | £12.51                 | 100%       | £12.51                    |
| 3           | Pathology                 |          | 100%        | Pathology   | HIV Serum test (4th Generation)                    | £12.78   | Sample      | 1        | £12.78                 | 100%       | £12.78                    |
| 3           | Pathology                 |          | 100%        | Pathology   | Syphilis Immunossassy - Total antibody (IgG & IgM) | £16.50   | Sample      | 1        | £16.50                 | 100%       | £16.50                    |
| 4           | Results Management        |          | 100%        | 6 Staff     | Blend Nurse 5/6                                    | £0.75    | Minute      | 100%     | £4.50                  | 100%       | £4.50                     |
| 4           | Results Management        |          | 100%        | Consumables | Letter notification                                | £0.58    | Item        | 0.02     | £0.01                  | 100%       | £0.01                     |
| 4           | Results Management        |          | 100%        | Consumables | Phone call                                         | £0.07    | Minute      | 0.03     | £0.00                  | 100%       | £0.00                     |
| 4           | Results Management        |          | 100%        | Consumables | SMS Text message                                   | £0.10    | Item        | 0.95     | £0.10                  | 100%       | £0.10                     |
| 5           | Contact Pos. + Equiv.     |          | 1%          | 15 Staff    | Blend Nurse 7/8                                    | £1.10    | Minute      | 50%      | £0.08                  | 50%        | £0.04                     |
| 5           | Contact Pos. + Equiv.     |          | 1%          | 15 Staff    | Blend HA                                           | £1.03    | Minute      | 50%      | £0.08                  | 50%        | £0.04                     |
| 5           | Contact Pos. + Equiv.     |          | 1%          | Consumables | Letter notification                                | £0.58    | Item        | 0.05     | £0.00                  | 50%        | £0.00                     |
| 5           | Contact Pos. + Equiv.     |          | 1%          | Consumables | Phone Call                                         | £0.07    | Minute      | 0.05     | £0.00                  | 50%        | £0.00                     |
| 5           | Contact Pos. + Equiv.     |          | 1%          | Consumables | SMS Text message                                   | £0.10    | Item        | 0.90     | £0.00                  | 50%        | £0.00                     |



**PATHWAY**

Pathway Name: **Current self-service pathways for asymptomatic patients**

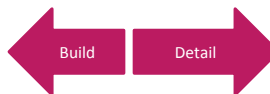

| Time (minutes)            | Activity                |                                 |
|---------------------------|-------------------------|---------------------------------|
|                           | Primary Pathway Minutes | Additional Pathway Proportional |
| <b>Total</b>              | <b>14.9</b>             | <b>14.2</b>                     |
| Doctor/7/8                |                         |                                 |
| Blend Nurse 7/8           |                         |                                 |
| Blend all com SRH N2 - Dr |                         |                                 |
| Blend HA                  |                         |                                 |
| Blend Nurse 5/6/7/8       | 1.5                     | 0.8                             |
| Blend Nurse 5/6           | 5.4                     | 5.4                             |
| Admin/clerical            | 8.0                     | 8.0                             |

| Step Number  | 1                     | 2              | 3         | 4                  | 5                     |
|--------------|-----------------------|----------------|-----------|--------------------|-----------------------|
| Step Name    | Prep kits for machine | Process Sample | Pathology | Results Management | Contact Pos. + Equiv. |
| Activity     | 100%<br>3             | 100%<br>5      | 100%<br>0 | 90%<br>6           | 10%<br>15             |
| Proportional | 100%                  | 100%           | 100%      | 100%               | 50%                   |

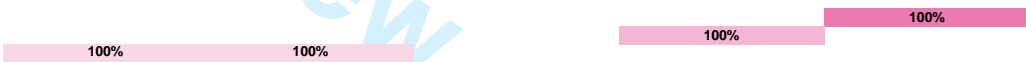

**Non-Staff Inputs Key code:**

| Key code                                              | Consumables | Drugs | Equipment | Other | Pathology | Custom |
|-------------------------------------------------------|-------------|-------|-----------|-------|-----------|--------|
| KY Lubricant (2)                                      |             |       |           |       |           |        |
| Literature (STI) (3)                                  |             |       |           |       |           |        |
| Male Condom (10)                                      |             |       |           |       |           |        |
| Sample Collection Instructions                        |             |       |           |       |           |        |
| Urine Pot, sterile collection (0.5)                   |             |       |           |       |           |        |
| Urine Specimen Container (PCR Tube and Pipette) (0.5) |             |       |           |       |           |        |
| Vulvo-vaginal swab (0.5)                              |             |       |           |       |           |        |

| Key code                    | Consumables | Drugs | Equipment | Other | Pathology | Custom |
|-----------------------------|-------------|-------|-----------|-------|-----------|--------|
| Chlamydia & Gonorrhoea NAAT |             |       |           |       |           |        |
| Letter notification (0.05)  |             |       |           |       |           |        |
| Phone call (0.03)           |             |       |           |       |           |        |
| SMS Text message (0.95)     |             |       |           |       |           |        |

Current self-service pathways for asymptomatic patients

PDF Options

| Staff                     | Total Primary Cost (£) | Total Additional Cost (£) |
|---------------------------|------------------------|---------------------------|
| Doctor/7/8                |                        |                           |
| Blend Nurse 7/8           |                        |                           |
| Blend all com SRH N2 - Dr |                        |                           |
| Blend HA                  |                        |                           |
| Blend Nurse 5/6/7/8       | 1.34                   | 0.67                      |
| Blend Nurse 5/6           | 4.05                   | 4.05                      |
| Admin/clerical            | 4.22                   | 4.22                      |
| <b>Total</b>              | <b>9.61</b>            | <b>8.94</b>               |
| Non-Staff                 | Total Primary Cost (£) | Total Additional Cost (£) |
| Consumables               | 2.25                   | 2.25                      |
| Drugs                     |                        |                           |
| Equipment                 |                        |                           |
| Other                     |                        |                           |
| Pathology                 | 12.51                  | 12.51                     |
| Custom                    |                        |                           |
| <b>Total</b>              | <b>14.76</b>           | <b>14.76</b>              |
| <b>Grand Total</b>        | <b>24.37</b>           | <b>23.70</b>              |

| Step Number | Step Name             | Activity | Time (mins) | Type        | Name                                            | Cost (£) | Unit        | Quantity | Total Primary Cost (£) | Additional | Total Additional Cost (£) |
|-------------|-----------------------|----------|-------------|-------------|-------------------------------------------------|----------|-------------|----------|------------------------|------------|---------------------------|
| 1           | Prep kits for machine |          | 100%        | 3 Staff     | Admin/clerical                                  | £0.53    | Minute      | 100%     | £1.58                  | 100%       | £1.58                     |
| 1           | Prep kits for machine |          | 100%        | Consumables | KY Lubricant                                    | £0.30    | Application | 2        | £0.60                  | 100%       | £0.60                     |
| 1           | Prep kits for machine |          | 100%        | Consumables | Literature (STI)                                | £0.06    | Item        | 3        | £0.18                  | 100%       | £0.18                     |
| 1           | Prep kits for machine |          | 100%        | Consumables | Male Condom                                     | £0.06    | Item        | 10       | £0.58                  | 100%       | £0.58                     |
| 1           | Prep kits for machine |          | 100%        | Consumables | Sample Collection Instructions                  | £0.05    | Item        | 1        | £0.05                  | 100%       | £0.05                     |
| 1           | Prep kits for machine |          | 100%        | Consumables | Urine Pot, sterile collection                   | £0.23    | Item        | 0.5      | £0.11                  | 100%       | £0.11                     |
| 1           | Prep kits for machine |          | 100%        | Consumables | Urine Specimen Container (PCR Tube and Pipette) | £1.04    | Item        | 0.5      | £0.52                  | 100%       | £0.52                     |
| 1           | Prep kits for machine |          | 100%        | Consumables | Vulvo-vaginal swab                              | £0.16    | Sample      | 0.5      | £0.08                  | 100%       | £0.08                     |
| 2           | Process Sample        |          | 100%        | 5 Staff     | Admin/clerical                                  | £0.53    | Minute      | 100%     | £2.64                  | 100%       | £2.64                     |
| 3           | Pathology             |          | 100%        | Pathology   | Chlamydia & Gonorrhoea NAAT                     | £12.51   | Sample      | 1        | £12.51                 | 100%       | £12.51                    |
| 4           | Results Management    |          | 90%         | 6 Staff     | Blend Nurse 5/6                                 | £0.75    | Minute      | 100%     | £4.05                  | 100%       | £4.05                     |
| 4           | Results Management    |          | 90%         | Consumables | Letter notification                             | £0.58    | Item        | 0.05     | £0.03                  | 100%       | £0.03                     |
| 4           | Results Management    |          | 90%         | Consumables | Phone call                                      | £0.07    | Minute      | 0.03     | £0.00                  | 100%       | £0.00                     |
| 4           | Results Management    |          | 90%         | Consumables | SMS Text message                                | £0.10    | Item        | 0.95     | £0.09                  | 100%       | £0.09                     |
| 5           | Contact Pos. + Equiv. |          | 10%         | 15 Staff    | Blend Nurse 5/6/7/8                             | £0.89    | Minute      | 100%     | £1.34                  | 50%        | £0.67                     |
| 5           | Contact Pos. + Equiv. |          | 10%         | Consumables | Letter notification                             | £0.58    | Item        | 0.05     | £0.00                  | 50%        | £0.00                     |
| 5           | Contact Pos. + Equiv. |          | 10%         | Consumables | Phone call                                      | £0.07    | Minute      | 0.05     | £0.00                  | 50%        | £0.00                     |
| 5           | Contact Pos. + Equiv. |          | 10%         | Consumables | SMS Text message                                | £0.10    | Item        | 0.9      | £0.01                  | 50%        | £0.01                     |

**PATHWAY**

Pathway Name: **POC self-service pathways for asymptomatic patients**

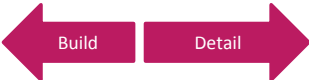

|                           | Step Number     | Step Name          | Activity                                                   |
|---------------------------|-----------------|--------------------|------------------------------------------------------------|
| Time (minutes)            | Primary Pathway | Additional Pathway | Primary Pathway Minutes<br>Additional Pathway Proportional |
| <b>Total</b>              | <b>14.9</b>     | <b>14.2</b>        |                                                            |
| Doctor/7/8                |                 |                    |                                                            |
| Blend Nurse 7/8           |                 |                    |                                                            |
| Blend all com SRH N2 - Dr |                 |                    |                                                            |
| Blend HA                  |                 |                    |                                                            |
| Blend Nurse 5/6/7/8       | 6.5             | 5.8                |                                                            |
| Blend Nurse 5/6           | 5.4             | 5.4                |                                                            |
| Admin/clerical            | 3.0             | 3.0                |                                                            |

|      | 1                     | 2                         | 3                  | 4                     |
|------|-----------------------|---------------------------|--------------------|-----------------------|
|      | Prep kits for machine | PoC Test + Review Results | Results Management | Contact Pos. + Equiv. |
| 100% | 100%                  | 90%                       | 10%                |                       |
| 3    | 5                     | 6                         | 15                 |                       |
| 100% | 100%                  | 100%                      | 50%                |                       |

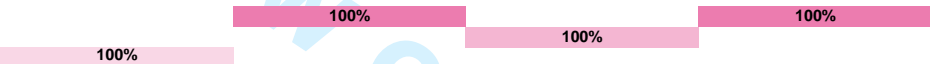

**Non-Staff Inputs Key code:**

- Consumables
- Drugs
- Equipment
- Other
- Pathology
- Custom

|                                     |                        |                  |                            |
|-------------------------------------|------------------------|------------------|----------------------------|
| Cepheid Sample Collection Kit       | Cepheid PoC CT/GC Test | SMS Text message | Letter notification (0.05) |
| KY Lubricant (2)                    |                        |                  | Phone call (0.05)          |
| Literature (STI) (3)                |                        |                  | SMS Text message (0.9)     |
| Male Condom (10)                    |                        |                  |                            |
| Sample Collection Instructions      |                        |                  |                            |
| Urine Pot, sterile collection (0.7) |                        |                  |                            |

POC self-service pathways for asymptomatic patients

PDF Options

| Staff                     | Total Primary Cost (£) | Total Additional Cost (£) |
|---------------------------|------------------------|---------------------------|
| Doctor/7/8                |                        |                           |
| Blend Nurse 7/8           |                        |                           |
| Blend all com SRH N2 - Dr |                        |                           |
| Blend HA                  |                        |                           |
| Blend Nurse 5/6/7/8       | 5.80                   | 5.13                      |
| Blend Nurse 5/6           | 4.05                   | 4.05                      |
| Admin/clerical            | 1.58                   | 1.58                      |
| <b>Total</b>              | <b>11.43</b>           | <b>10.76</b>              |
| Non-Staff                 | Total Primary Cost (£) | Total Additional Cost (£) |
| Consumables               | 3.17                   | 3.17                      |
| Drugs                     |                        |                           |
| Equipment                 |                        |                           |
| Other                     |                        |                           |
| Pathology                 | 18.00                  | 18.00                     |
| Custom                    |                        |                           |
| <b>Total</b>              | <b>21.17</b>           | <b>21.17</b>              |
| <b>Grand Total</b>        | <b>32.60</b>           | <b>31.94</b>              |

| Step Number | Step Name                 | Activity | Time (mins) | Type | Name        | Cost (£)                       | Unit   | Quantity    | Total Primary Cost (£) | Additional | Total Additional Cost (£) |
|-------------|---------------------------|----------|-------------|------|-------------|--------------------------------|--------|-------------|------------------------|------------|---------------------------|
| 1           | Prep kits for machine     |          | 100%        | 3    | Staff       | Admin/clerical                 | £0.53  | Minute      | 100%                   | 100%       | £1.58                     |
| 1           | Prep kits for machine     |          | 100%        |      | Consumables | Cepheid Sample Collection Kit  | £1.50  | Item        | 1                      | 100%       | £1.50                     |
| 1           | Prep kits for machine     |          | 100%        |      | Consumables | KY Lubricant                   | £0.30  | Application | 2                      | 100%       | £0.60                     |
| 1           | Prep kits for machine     |          | 100%        |      | Consumables | Literature (STI)               | £0.06  | Item        | 3                      | 100%       | £0.18                     |
| 1           | Prep kits for machine     |          | 100%        |      | Consumables | Male Condom                    | £0.06  | Item        | 10                     | 100%       | £0.58                     |
| 1           | Prep kits for machine     |          | 100%        |      | Consumables | Sample Collection Instructions | £0.05  | Item        | 1                      | 100%       | £0.05                     |
| 1           | Prep kits for machine     |          | 100%        |      | Consumables | Urine Pot, sterile collection  | £0.23  | Item        | 0.7                    | 100%       | £0.16                     |
| 2           | PoC Test + Review Results |          | 100%        | 5    | Staff       | Blend Nurse 5/6/7/8            | £0.89  | Minute      | 100%                   | 100%       | £4.46                     |
| 2           | PoC Test + Review Results |          | 100%        |      | Pathology   | Cepheid PoC CT/GC Test         | £18.00 | Sample      | 1                      | 100%       | £18.00                    |
| 3           | Results Management        |          | 90%         | 6    | Staff       | Blend Nurse 5/6                | £0.75  | Minute      | 100%                   | 100%       | £4.05                     |
| 3           | Results Management        |          | 90%         |      | Consumables | SMS Text message               | £0.10  | Item        | 1                      | 100%       | £0.09                     |
| 4           | Contact Pos. + Equiv.     |          | 10%         | 15   | Staff       | Blend Nurse 5/6/7/8            | £0.89  | Minute      | 100%                   | 50%        | £0.67                     |
| 4           | Contact Pos. + Equiv.     |          | 10%         |      | Consumables | Letter notification            | £0.58  | Item        | 0.05                   | 50%        | £0.00                     |
| 4           | Contact Pos. + Equiv.     |          | 10%         |      | Consumables | Phone call                     | £0.07  | Minute      | 0.05                   | 50%        | £0.00                     |
| 4           | Contact Pos. + Equiv.     |          | 10%         |      | Consumables | SMS Text message               | £0.10  | Item        | 0.9                    | 50%        | £0.01                     |

1  
2  
3  
4  
5  
6  
7  
8  
9  
10  
11  
12  
13  
14  
15  
16  
17  
18  
19  
20  
21  
22  
23  
24  
25  
26  
27  
28  
29  
30  
31  
32  
33  
34  
35  
36  
37  
38  
39  
40  
41  
42  
43  
44  
45  
46  
47

**PATHWAY**

Pathway Name: **Chlamydia treatment**

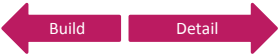

|                           | Step Number | Step Name | Activity | Primary Pathway Minutes | Additional Pathway Proportional |
|---------------------------|-------------|-----------|----------|-------------------------|---------------------------------|
| <b>Time (minutes)</b>     |             |           |          | <i>Primary Pathway</i>  | <i>Additional Pathway</i>       |
| <b>Total</b>              |             |           |          | <b>23.5</b>             | <b>13.5</b>                     |
| Doctor/7/8                |             |           |          | 17.0                    | 12.0                            |
| Blend Nurse 7/8           |             |           |          |                         |                                 |
| Blend all com SRH N2 - Dr |             |           |          |                         |                                 |
| Blend HA                  |             |           |          | 1.5                     | 1.5                             |
| Blend Nurse 5/6/7/8       |             |           |          |                         |                                 |
| Blend Nurse 5/6           |             |           |          |                         |                                 |
| Admin/clerical            |             |           |          | 5.0                     |                                 |

|      | 1                     | 2       | 3         | 4                    | 5                              |
|------|-----------------------|---------|-----------|----------------------|--------------------------------|
|      | Register Meet + Greet | Results | Treatment | Partner Notification | Supported Partner Notification |
| 100% | 100%                  | 100%    | 100%      | 100%                 | 10%                            |
| 5    | 5                     | 6       | 6         | 15                   |                                |
| 0%   | 0%                    | 100%    | 100%      | 100%                 | 100%                           |
|      |                       | 100%    | 100%      | 100%                 |                                |
|      |                       |         |           |                      | 100%                           |
| 100% |                       |         |           |                      |                                |

**Non-Staff Inputs Key code:**

|             |
|-------------|
| Consumables |
| Drugs       |
| Equipment   |
| Other       |
| Pathology   |

|                                        |             |                 |
|----------------------------------------|-------------|-----------------|
| KY Lubricant (2)                       | PN slip (3) | Phone call (15) |
| Literature (STI) (3)                   |             |                 |
| Male Condom (10)                       |             |                 |
| Azithromycin (1000 mg) (95%)           |             |                 |
| Doxycycline (100mg capsules * 14) (5%) |             |                 |

Chlamydia treatment

PDF Options

| Staff                     | Total Primary Cost (£) | Total Additional Cost (£) |
|---------------------------|------------------------|---------------------------|
| Doctor/7/8                | 24.72                  | 17.45                     |
| Blend Nurse 7/8           |                        |                           |
| Blend all com SRH N2 - Dr |                        |                           |
| Blend HA                  | 1.55                   | 1.55                      |
| Blend Nurse 5/6/7/8       |                        |                           |
| Blend Nurse 5/6           |                        |                           |
| Admin/clerical            | 2.64                   | 0.00                      |
| <b>Total</b>              | <b>28.90</b>           | <b>18.99</b>              |

  

| Non-Staff    | Total Primary Cost (£) | Total Additional Cost (£) |
|--------------|------------------------|---------------------------|
| Consumables  | 1.62                   | 1.62                      |
| Drugs        | 4.38                   | 4.38                      |
| Equipment    |                        |                           |
| Other        |                        |                           |
| Pathology    |                        |                           |
| Custom       |                        |                           |
| <b>Total</b> | <b>6.00</b>            | <b>6.00</b>               |

  

| Grand Total | Total Primary Cost (£) | Total Additional Cost (£) |
|-------------|------------------------|---------------------------|
|             | <b>34.89</b>           | <b>24.99</b>              |

| Step Number | Step Name                      | Activity | Time (mins) | Type        | Name                              | Cost (£) | Unit             | Quantity | Total Primary Cost (£) | Additional | Total Additional Cost (£) |
|-------------|--------------------------------|----------|-------------|-------------|-----------------------------------|----------|------------------|----------|------------------------|------------|---------------------------|
| 1           | Register Meet + Greet          |          | 100%        | 5 Staff     | Admin/clerical                    | £0.53    | Minute           | 100%     | £2.64                  | 0%         | £0.00                     |
| 2           | Results                        |          | 100%        | 5 Staff     | Doctor/7/8                        | £1.45    | Minute           | 100%     | £7.27                  | 0%         | £0.00                     |
| 3           | Treatment                      |          | 100%        | 6 Staff     | Doctor/7/8                        | £1.45    | Minute           | 100%     | £8.72                  | 100%       | £8.72                     |
| 3           | Treatment                      |          | 100%        | Consumables | KY Lubricant                      | £0.30    | Application      | 2        | £0.60                  | 100%       | £0.60                     |
| 3           | Treatment                      |          | 100%        | Consumables | Literature (STI)                  | £0.06    | Item             | 3        | £0.18                  | 100%       | £0.18                     |
| 3           | Treatment                      |          | 100%        | Consumables | Male Condom                       | £0.06    | Item             | 10       | £0.58                  | 100%       | £0.58                     |
| 3           | Treatment                      |          | 100%        | Drugs       | Azithromycin (1000 mg)            | £4.50    | Treatment Course | 95%      | £4.28                  | 100%       | £4.28                     |
| 3           | Treatment                      |          | 100%        | Drugs       | Doxycycline (100mg capsules * 14) | £2.03    | Treatment Course | 5%       | £0.10                  | 100%       | £0.10                     |
| 4           | Partner Notification           |          | 100%        | 6 Staff     | Doctor/7/8                        | £1.45    | Minute           | 100%     | £8.72                  | 100%       | £8.72                     |
| 4           | Partner Notification           |          | 100%        | Consumables | PN slip                           | £0.05    | Item             | 3        | £0.16                  | 100%       | £0.16                     |
| 5           | Supported Partner Notification |          | 10%         | 15 Staff    | Blend HA                          | £1.03    | Minute           | 100%     | £1.55                  | 100%       | £1.55                     |
| 5           | Supported Partner Notification |          | 10%         | Consumables | Phone call                        | £0.07    | Minute           | 15       | £0.11                  | 100%       | £0.11                     |

1  
2  
3  
4  
5  
6  
7  
8  
9  
10  
11  
12  
13  
14  
15  
16  
17  
18  
19  
20  
21  
22  
23  
24  
25  
26  
27  
28  
29  
30  
31  
32  
33  
34  
35  
36  
37  
38  
39  
40  
41  
42  
43  
44  
45  
46  
47

**PATHWAY**

Pathway Name: **Gonorrhoea treatment 1st visit**

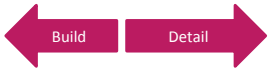

|                           | Step Number | Step Name | Activity | Primary Pathway Minutes | Additional Pathway Proportional |
|---------------------------|-------------|-----------|----------|-------------------------|---------------------------------|
| <b>Time (minutes)</b>     |             |           |          | <i>Primary Pathway</i>  | <i>Additional Pathway</i>       |
| <b>Total</b>              |             |           |          | 51.0                    | 38.0                            |
| Doctor/7/8                |             |           |          | 10.0                    | 10.0                            |
| Blend Nurse 7/8           |             |           |          |                         |                                 |
| Blend all com SRH N2 - Dr |             |           |          |                         |                                 |
| Blend HA                  |             |           |          | 6.0                     | 3.0                             |
| Blend Nurse 5/6/7/8       |             |           |          | 30.0                    | 25.0                            |
| Blend Nurse 5/6           |             |           |          |                         |                                 |
| Admin/clerical            |             |           |          | 5.0                     |                                 |

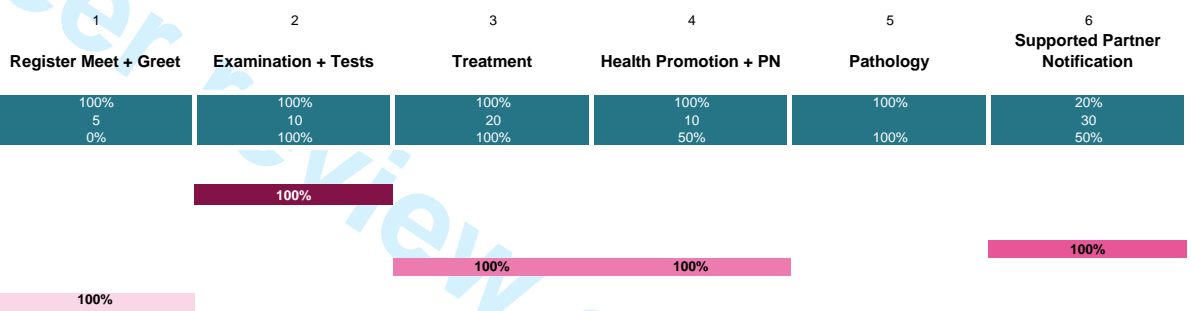

**Non-Staff Inputs Key code:**

- Consumables
- Drugs
- Equipment
- Other
- Pathology
- Custom

|                  |                        |                      |                                    |                 |
|------------------|------------------------|----------------------|------------------------------------|-----------------|
| Culture plate    | Needle                 | KY Lubricant (2)     | GC Culture/typing - lab processing | Phone call (30) |
| Culture swab- GC | Azithromycin (1000 mg) | Literature (STI) (3) |                                    |                 |
| Gloves           | Ceftriaxone (500 mg)   | Male Condom (10)     |                                    |                 |
| KY Lubricant     |                        | PN slip (3)          |                                    |                 |
| Speculum (0.5)   |                        |                      |                                    |                 |
| Swab             |                        |                      |                                    |                 |

Gonorrhoea treatment 1st visit

PDF Options

| Staff                     | Total Primary Cost (£) | Total Additional Cost (£) |
|---------------------------|------------------------|---------------------------|
| Doctor/7/8                | 14.54                  | 14.54                     |
| Blend Nurse 7/8           |                        |                           |
| Blend all com SRH N2 - Dr |                        |                           |
| Blend HA                  | 6.18                   | 3.09                      |
| Blend Nurse 5/6/7/8       | 26.76                  | 22.30                     |
| Blend Nurse 5/6           |                        |                           |
| Admin/clerical            | 2.64                   | 0.00                      |
| <b>Total</b>              | <b>50.12</b>           | <b>39.93</b>              |
| Non-Staff                 | Total Primary Cost (£) | Total Additional Cost (£) |
| Consumables               | 4.81                   | 4.81                      |
| Drugs                     | 9.59                   | 9.59                      |
| Equipment                 |                        |                           |
| Other                     |                        |                           |
| Pathology                 | 7.55                   | 7.55                      |
| Custom                    |                        |                           |
| <b>Total</b>              | <b>21.95</b>           | <b>21.95</b>              |
| <b>Grand Total</b>        | <b>72.07</b>           | <b>61.88</b>              |

| Step Number | Step Name                      | Activity | Time (mins) | Type        | Name                               | Cost (£) | Unit             | Quantity | Total Primary Cost (£) | Additional | Total Additional Cost (£) |
|-------------|--------------------------------|----------|-------------|-------------|------------------------------------|----------|------------------|----------|------------------------|------------|---------------------------|
| 1           | Register Meet + Greet          |          | 100%        | 5 Staff     | Admin/clerical                     | £0.53    | Minute           | 100%     | £2.64                  | 0%         | £0.00                     |
| 2           | Examination + Tests            |          | 100%        | 10 Staff    | Doctor/7/8                         | £1.45    | Minute           | 100%     | £14.54                 | 100%       | £14.54                    |
| 2           | Examination + Tests            |          | 100%        | Consumables | Culture plate                      | £1.04    | Item             | 1        | £1.04                  | 100%       | £1.04                     |
| 2           | Examination + Tests            |          | 100%        | Consumables | Culture swab- GC                   | £1.04    | Item             | 1        | £1.04                  | 100%       | £1.04                     |
| 2           | Examination + Tests            |          | 100%        | Consumables | Gloves                             | £0.05    | Pair             | 1        | £0.05                  | 100%       | £0.05                     |
| 2           | Examination + Tests            |          | 100%        | Consumables | KY Lubricant                       | £0.30    | Application      | 1        | £0.30                  | 100%       | £0.30                     |
| 2           | Examination + Tests            |          | 100%        | Consumables | Speculum                           | £0.82    | Item             | 0.5      | £0.41                  | 100%       | £0.41                     |
| 2           | Examination + Tests            |          | 100%        | Consumables | Swab                               | £0.02    | Item             | 1        | £0.02                  | 100%       | £0.02                     |
| 3           | Treatment                      |          | 100%        | 20 Staff    | Blend Nurse 5/6/7/8                | £0.89    | Minute           | 100%     | £17.84                 | 100%       | £17.84                    |
| 3           | Treatment                      |          | 100%        | Consumables | Needle                             | £0.03    | Item             | 1        | £0.03                  | 100%       | £0.03                     |
| 3           | Treatment                      |          | 100%        | Drugs       | Azithromycin (1000 mg)             | £4.50    | Treatment Course | 1        | £4.50                  | 100%       | £4.50                     |
| 3           | Treatment                      |          | 100%        | Drugs       | Ceftriaxone (500 mg)               | £5.09    | Treatment Course | 1        | £5.09                  | 100%       | £5.09                     |
| 4           | Health Promotion + PN          |          | 100%        | 10 Staff    | Blend Nurse 5/6/7/8                | £0.89    | Minute           | 100%     | £8.92                  | 50%        | £4.46                     |
| 4           | Health Promotion + PN          |          | 100%        | Consumables | KY Lubricant                       | £0.30    | Application      | 2        | £0.60                  | 50%        | £0.60                     |
| 4           | Health Promotion + PN          |          | 100%        | Consumables | Literature (STI)                   | £0.06    | Item             | 3        | £0.18                  | 50%        | £0.18                     |
| 4           | Health Promotion + PN          |          | 100%        | Consumables | Male Condom                        | £0.06    | Item             | 10       | £0.58                  | 50%        | £0.58                     |
| 4           | Health Promotion + PN          |          | 100%        | Consumables | PN slip                            | £0.05    | Item             | 3        | £0.16                  | 50%        | £0.16                     |
| 5           | Pathology                      |          | 100%        | Pathology   | GC Culture/typing - lab processing | £7.55    | Sample           | 1        | £7.55                  | 100%       | £7.55                     |
| 6           | Supported Partner Notification |          | 20%         | 30 Staff    | Blend HA                           | £1.03    | Minute           | 100%     | £6.18                  | 50%        | £3.09                     |
| 6           | Supported Partner Notification |          | 20%         | Consumables | Phone call                         | £0.07    | Minute           | 30       | £0.42                  | 50%        | £0.42                     |



1  
2  
3  
4  
5  
6  
7  
8  
9  
10  
11  
12  
13  
14  
15  
16  
17  
18  
19  
20  
21  
22  
23  
24  
25  
26  
27  
28  
29  
30  
31  
32  
33  
34  
35  
36  
37  
38  
39  
40  
41  
42  
43  
44  
45  
46  
47

**PATHWAY**

Pathway Name: **Current gonorrhoea treatment  
2nd visit TOC**

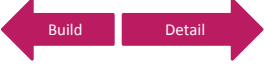

| Time (minutes)            | Step Number             |                                 |
|---------------------------|-------------------------|---------------------------------|
|                           | Step Name               |                                 |
|                           | Activity                | Activity                        |
|                           | Primary Pathway Minutes | Additional Pathway Proportional |
| Total                     | 20.0                    | 10.0                            |
| Doctor/7/8                |                         |                                 |
| Blend Nurse 7/8           |                         |                                 |
| Blend all com SRH N2 - Dr |                         |                                 |
| Blend HA                  | 5.0                     | 5.0                             |
| Blend Nurse 5/6/7/8       | 10.0                    | 5.0                             |
| Blend Nurse 5/6           |                         |                                 |
| Admin/clerical            | 5.0                     |                                 |

|      | 1                     | 2            | 3           | 4                  |
|------|-----------------------|--------------|-------------|--------------------|
|      | Register Meet + Greet | Exam & Tests | Pathology 2 | Results Management |
| 100% | 100%                  | 100%         | 100%        | 100%               |
| 5    | 5                     | 10           |             | 5                  |
| 0%   | 0%                    | 50%          | 100%        | 100%               |

Non-Staff Inputs Key code:

|             |
|-------------|
| Consumables |
| Drugs       |
| Equipment   |
| Other       |
| Pathology   |
| Custom      |

|                                                       |                                    |                            |
|-------------------------------------------------------|------------------------------------|----------------------------|
| Culture plate                                         | GC Culture/typing - lab processing | Letter notification (0.02) |
| Culture swab- GC                                      | GC NAAT                            | Phone call (0.03)          |
| Gloves                                                |                                    | SMS Text message (0.95)    |
| KY Lubricant                                          |                                    |                            |
| Sample Collection Instructions                        |                                    |                            |
| Speculum (0.5)                                        |                                    |                            |
| Swab                                                  |                                    |                            |
| Urine Pot, sterile collection (0.5)                   |                                    |                            |
| Urine Specimen Container (PCR Tube and Pipette) (0.5) |                                    |                            |
| Vulvo-vaginal swab (0.5)                              |                                    |                            |

Current gonorrhoea treatment 2nd visit TOC

| Staff                     | Total Primary Cost (£) | Total Additional Cost (£) |
|---------------------------|------------------------|---------------------------|
| Doctor/7/8                |                        |                           |
| Blend Nurse 7/8           |                        |                           |
| Blend all com SRH N2 - Dr |                        |                           |
| Blend HA                  | 5.15                   | 5.15                      |
| Blend Nurse 5/6/7/8       | 8.92                   | 4.46                      |
| Blend Nurse 5/6           |                        |                           |
| Admin/clerical            | 2.64                   | 0.00                      |
| <b>Total</b>              | <b>16.71</b>           | <b>9.61</b>               |
| Non-Staff                 | Total Primary Cost (£) | Total Additional Cost (£) |
| Consumables               | 3.72                   | 3.72                      |
| Drugs                     |                        |                           |
| Equipment                 |                        |                           |
| Other                     |                        |                           |
| Pathology                 | 19.55                  | 19.55                     |
| Custom                    |                        |                           |
| <b>Total</b>              | <b>23.27</b>           | <b>23.27</b>              |
| <b>Grand Total</b>        | <b>39.98</b>           | <b>32.89</b>              |

PDF Options

| Step Number | Step Name             | Activity | Time (mins) | Type        | Name                                            | Cost (£) | Unit        | Quantity | Total Primary Cost (£) | Additional | Total Additional Cost (£) |
|-------------|-----------------------|----------|-------------|-------------|-------------------------------------------------|----------|-------------|----------|------------------------|------------|---------------------------|
| 1           | Register Meet + Greet |          | 100%        | 5 Staff     | Admin/clerical                                  | £0.53    | Minute      | 100%     | £2.64                  | 0%         | £0.00                     |
| 2           | Exam & Tests          |          | 100%        | 10 Staff    | Blend Nurse 5/6/7/8                             | £0.89    | Minute      | 100%     | £8.92                  | 50%        | £4.46                     |
| 2           | Exam & Tests          |          | 100%        | Consumables | Culture plate                                   | £1.04    | Item        | 1        | £1.04                  | 50%        | £1.04                     |
| 2           | Exam & Tests          |          | 100%        | Consumables | Culture swab- GC                                | £1.04    | Item        | 1        | £1.04                  | 50%        | £1.04                     |
| 2           | Exam & Tests          |          | 100%        | Consumables | Gloves                                          | £0.05    | Pair        | 1        | £0.05                  | 50%        | £0.05                     |
| 2           | Exam & Tests          |          | 100%        | Consumables | KY Lubricant                                    | £0.30    | Application | 1        | £0.30                  | 50%        | £0.30                     |
| 2           | Exam & Tests          |          | 100%        | Consumables | Sample Collection Instructions                  | £0.05    | Item        | 1        | £0.05                  | 50%        | £0.05                     |
| 2           | Exam & Tests          |          | 100%        | Consumables | Speculum                                        | £0.82    | Item        | 0.5      | £0.41                  | 50%        | £0.41                     |
| 2           | Exam & Tests          |          | 100%        | Consumables | Swab                                            | £0.02    | Item        | 1        | £0.02                  | 50%        | £0.02                     |
| 2           | Exam & Tests          |          | 100%        | Consumables | Urine Pot, sterile collection                   | £0.23    | Item        | 0.5      | £0.11                  | 50%        | £0.11                     |
| 2           | Exam & Tests          |          | 100%        | Consumables | Urine Specimen Container (PCR Tube and Pipette) | £1.04    | Item        | 0.5      | £0.52                  | 50%        | £0.52                     |
| 2           | Exam & Tests          |          | 100%        | Consumables | Vulvo-vaginal swab                              | £0.16    | Sample      | 0.5      | £0.08                  | 50%        | £0.08                     |
| 3           | Pathology 2           |          | 100%        | Pathology   | GC Culture/typing - lab processing              | £7.55    | Sample      | 1        | £7.55                  | 100%       | £7.55                     |
| 3           | Pathology 2           |          | 100%        | Pathology   | GC NAAT                                         | £12.00   | Sample      | 1        | £12.00                 | 100%       | £12.00                    |
| 4           | Results Management    |          | 100%        | 5 Staff     | Blend HA                                        | £1.03    | Minute      | 100%     | £5.15                  | 100%       | £5.15                     |
| 4           | Results Management    |          | 100%        | Consumables | Letter notification                             | £0.58    | Item        | 0.02     | £0.01                  | 100%       | £0.01                     |
| 4           | Results Management    |          | 100%        | Consumables | Phone call                                      | £0.07    | Minute      | 0.03     | £0.00                  | 100%       | £0.00                     |
| 4           | Results Management    |          | 100%        | Consumables | SMS Text message                                | £0.10    | Item        | 0.95     | £0.10                  | 100%       | £0.10                     |



POC gonorrhoea treatment 2nd visit TOC

| Staff                     | Total Primary Cost (£) | Total Additional Cost (£) |
|---------------------------|------------------------|---------------------------|
| Doctor/7/8                |                        |                           |
| Blend Nurse 7/8           |                        |                           |
| Blend all com SRH N2 - Dr |                        |                           |
| Blend HA                  | 5.15                   | 5.15                      |
| Blend Nurse 5/6/7/8       | 8.92                   | 4.46                      |
| Blend Nurse 5/6           |                        |                           |
| Admin/clerical            | 2.64                   | 0.00                      |
| <b>Total</b>              | <b>16.71</b>           | <b>9.61</b>               |
| Non-Staff                 | Total Primary Cost (£) | Total Additional Cost (£) |
| Consumables               | 3.61                   | 3.61                      |
| Drugs                     |                        |                           |
| Equipment                 |                        |                           |
| Other                     |                        |                           |
| Pathology                 | 25.55                  | 25.55                     |
| Custom                    |                        |                           |
| <b>Total</b>              | <b>29.16</b>           | <b>29.16</b>              |
| <b>Grand Total</b>        | <b>45.87</b>           | <b>38.77</b>              |

PDF Options

| Step Number | Step Name             | Activity | Time (mins) | Type     | Name                | Cost (£) | Unit        | Quantity | Total Primary Cost (£) | Additional | Total Additional Cost (£) |
|-------------|-----------------------|----------|-------------|----------|---------------------|----------|-------------|----------|------------------------|------------|---------------------------|
| 1           | Register Meet + Greet |          | 100%        | 5 Staff  | Admin/clerical      | £0.53    | Minute      | 100%     | £2.64                  | 0%         | £0.00                     |
| 2           | Exam & Tests          |          | 100%        | 10 Staff | Blend Nurse 5/6/7/8 | £0.89    | Minute      | 100%     | £8.92                  | 50%        | £4.46                     |
| 2           | Exam & Tests          |          | 100%        |          | Consumables         | £1.04    | Item        | 1        | £1.04                  | 50%        | £1.04                     |
| 2           | Exam & Tests          |          | 100%        |          | Consumables         | £1.04    | Item        | 1        | £1.04                  | 50%        | £1.04                     |
| 2           | Exam & Tests          |          | 100%        |          | Consumables         | £0.05    | Pair        | 1        | £0.05                  | 50%        | £0.05                     |
| 2           | Exam & Tests          |          | 100%        |          | Consumables         | £0.30    | Application | 1        | £0.30                  | 50%        | £0.30                     |
| 2           | Exam & Tests          |          | 100%        |          | Consumables         | £0.05    | Item        | 1        | £0.05                  | 50%        | £0.05                     |
| 2           | Exam & Tests          |          | 100%        |          | Consumables         | £0.82    | Item        | 0.5      | £0.41                  | 50%        | £0.41                     |
| 2           | Exam & Tests          |          | 100%        |          | Consumables         | £0.02    | Item        | 1        | £0.02                  | 50%        | £0.02                     |
| 2           | Exam & Tests          |          | 100%        |          | Consumables         | £0.23    | Item        | 0.5      | £0.11                  | 50%        | £0.11                     |
| 2           | Exam & Tests          |          | 100%        |          | Consumables         | £1.04    | Item        | 0.5      | £0.52                  | 50%        | £0.52                     |
| 2           | Exam & Tests          |          | 100%        |          | Consumables         | £0.16    | Sample      | 0.5      | £0.08                  | 50%        | £0.08                     |
| 3           | Pathology 2           |          | 100%        |          | Pathology           | £18.00   | Sample      | 1        | £18.00                 | 100%       | £18.00                    |
| 3           | Pathology 2           |          | 100%        |          | Pathology           | £7.55    | Sample      | 1        | £7.55                  | 100%       | £7.55                     |
| 4           | Results Management    |          | 100%        | 5 Staff  | Blend HA            | £1.03    | Minute      | 100%     | £5.15                  | 100%       | £5.15                     |

**PATHWAY**

Pathway Name: **Gonorrhoea follow up visit for second line treatment after failure of initial treatment**

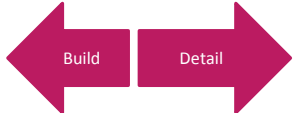

| Step Number               | Step Name | Activity                        | Time (minutes)  |                    |
|---------------------------|-----------|---------------------------------|-----------------|--------------------|
|                           |           |                                 | Primary Pathway | Additional Pathway |
|                           |           | Primary Pathway Minutes         |                 |                    |
|                           |           | Additional Pathway Proportional |                 |                    |
| <b>Total</b>              |           |                                 | <b>35.0</b>     | <b>25.0</b>        |
| Doctor/7/8                |           |                                 | 10.0            | 10.0               |
| Blend Nurse 7/8           |           |                                 |                 |                    |
| Blend all com SRH N2 - Dr |           |                                 |                 |                    |
| Blend HA                  |           |                                 |                 |                    |
| Blend Nurse 5/6/7/8       |           |                                 | 20.0            | 15.0               |
| Blend Nurse 5/6           |           |                                 |                 |                    |
| Admin/clerical            |           |                                 | 5.0             |                    |

|  | 1                     | 2           | 3         | 4                     |
|--|-----------------------|-------------|-----------|-----------------------|
|  | Register Meet + Greet | Examination | Treatment | Health Promotion + PN |
|  | 100%                  | 100%        | 100%      | 100%                  |
|  | 5                     | 10          | 10        | 10                    |
|  | 0%                    | 100%        | 100%      | 50%                   |

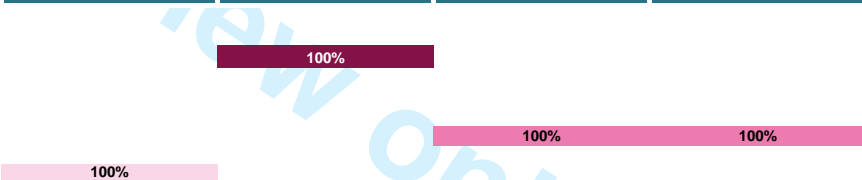

Non-Staff Inputs Key code:

|             |
|-------------|
| Consumables |
| Drugs       |
| Equipment   |
| Other       |

|                |                        |                      |
|----------------|------------------------|----------------------|
| Gloves         | Azithromycin (1000 mg) | KY Lubricant (2)     |
| KY Lubricant   | Cefixime               | Literature (STI) (3) |
| Speculum (0.5) |                        | Male Condom (10)     |
|                |                        | PN slip (3)          |

**Gonorrhoea follow up visit for second line treatment after failure of initial treatment**

PDF Options

| Staff                     | Total Primary Cost (£) | Total Additional Cost (£) |
|---------------------------|------------------------|---------------------------|
| Doctor/7/8                | 14.54                  | 14.54                     |
| Blend Nurse 7/8           |                        |                           |
| Blend all com SRH N2 - Dr |                        |                           |
| Blend HA                  |                        |                           |
| Blend Nurse 5/6/7/8       | 17.84                  | 13.38                     |
| Blend Nurse 5/6           |                        |                           |
| Admin/clerical            | 2.64                   | 0.00                      |
| <b>Total</b>              | <b>35.02</b>           | <b>27.92</b>              |
| Non-Staff                 | Total Primary Cost (£) | Total Additional Cost (£) |
| Consumables               | 2.27                   | 2.27                      |
| Drugs                     | 3.78                   | 3.78                      |
| Equipment                 |                        |                           |
| Other                     |                        |                           |
| Pathology                 |                        |                           |
| Custom                    |                        |                           |
| <b>Total</b>              | <b>6.05</b>            | <b>6.05</b>               |
| <b>Grand Total</b>        | <b>41.07</b>           | <b>33.97</b>              |

| Step Number | Step Name             | Activity | Time (mins) | Type        | Name                   | Cost (£) | Unit             | Quantity | Total Primary Cost (£) | Additional | Total Additional Cost (£) |
|-------------|-----------------------|----------|-------------|-------------|------------------------|----------|------------------|----------|------------------------|------------|---------------------------|
| 1           | Register Meet + Greet |          | 100%        | 5 Staff     | Admin/clerical         | £0.53    | Minute           | 100%     | £2.64                  | 0%         | £0.00                     |
| 2           | Examination           |          | 100%        | 10 Staff    | Doctor/7/8             | £1.45    | Minute           | 100%     | £14.54                 | 100%       | £14.54                    |
| 2           | Examination           |          | 100%        | Consumables | Gloves                 | £0.05    | Pair             | 1        | £0.05                  | 100%       | £0.05                     |
| 2           | Examination           |          | 100%        | Consumables | KY Lubricant           | £0.30    | Application      | 1        | £0.30                  | 100%       | £0.30                     |
| 2           | Examination           |          | 100%        | Consumables | Speculum               | £0.82    | Item             | 0.5      | £0.41                  | 100%       | £0.41                     |
| 3           | Treatment             |          | 100%        | 10 Staff    | Blend Nurse 5/6/7/8    | £0.89    | Minute           | 100%     | £8.92                  | 100%       | £8.92                     |
| 3           | Treatment             |          | 100%        | Drugs       | Azithromycin (1000 mg) |          | Treatment Course | 1        | £0.00                  | 100%       | £0.00                     |
| 3           | Treatment             |          | 100%        | Drugs       | Cefixime               | £3.78    | Treatment Course | 1        | £3.78                  | 100%       | £3.78                     |
| 4           | Health Promotion + PN |          | 100%        | 10 Staff    | Blend Nurse 5/6/7/8    | £0.89    | Minute           | 100%     | £8.92                  | 50%        | £4.46                     |
| 4           | Health Promotion + PN |          | 100%        | Consumables | KY Lubricant           | £0.30    | Application      | 2        | £0.60                  | 50%        | £0.60                     |
| 4           | Health Promotion + PN |          | 100%        | Consumables | Literature (STI)       | £0.06    | Item             | 3        | £0.18                  | 50%        | £0.18                     |
| 4           | Health Promotion + PN |          | 100%        | Consumables | Male Condom            | £0.06    | Item             | 10       | £0.58                  | 50%        | £0.58                     |
| 4           | Health Promotion + PN |          | 100%        | Consumables | PN slip                | £0.05    | Item             | 3        | £0.16                  | 50%        | £0.16                     |
